# Supplementary material for: Rhodium/bisphosphine-thiourea-catalyzed enantioselective hydrogenation of α,β-unsaturated N-acylpyrazoles
Source: Royal Society of Chemistry journal article supplement (doi:10.1039/c6cc04987g), 2016-01-01
Supplement: c6cc04987g1.pdf [file c6cc04987g1.pdf]

*Supporting information*

**Rhodium/Bisphosphine-Thiourea-Catalyzed Highly Enantioselective  
Hydrogenation of  $\alpha,\beta$ -Unsaturated *N*-Acylpyrazoles**

Pan Li,<sup>a,b</sup> Xinquan Hu,<sup>\*b</sup> Xiu-Qin Dong,<sup>\*a</sup> Xumu Zhang<sup>\*a,c</sup>

<sup>a</sup> College of Chemistry and Molecular Sciences, Wuhan University, Wuhan, Hubei 430072, P. R. China.

<sup>b</sup> College of Chemical Engineering, Zhejiang University of Technology, Hangzhou, Zhejiang, 310014, P.R. China.

<sup>c</sup> Department of Chemistry, South University of Science and Technology of China, Shenzhen, 518000, P.R. China.

Content

|                                                                                                 |    |
|-------------------------------------------------------------------------------------------------|----|
| I. General remarks.....                                                                         | 2  |
| II. General procedure for the synthesis of compounds <b>1</b> and <b>3</b> .....                | 2  |
| III. General procedure for asymmetric hydrogenation of compounds <b>1</b> and<br><b>3</b> ..... | 9  |
| IV. Procedure for the transformation of hydrogenation product <b>2b</b> .....                   | 18 |
| V. NMR spectra.....                                                                             | 19 |
| VI. HPLC and GC spectra.....                                                                    | 57 |
| VII. Reference.....                                                                             | 98 |

## I. General Remarks

All the reactions dealing with air- or moisture-sensitive compounds were carried out in a dry reaction vessel under a positive pressure of nitrogen or in the nitrogen-filled glovebox. Unless otherwise noted, all reagents and solvents were purchased from commercial suppliers without further purification. Anhydrous solvents were purchased from Sigma-Aldrich and transferred by syringe.  $^1\text{H}$  NMR,  $^{13}\text{C}$  NMR and  $^{31}\text{P}$  NMR spectra were recorded on a Bruker ADVANCE III (400 MHz) spectrometer with  $\text{CDCl}_3$  as the solvent and tetramethylsilane (TMS) as the internal standard. Chemical shifts are reported in parts per million (ppm,  $\delta$  scale) downfield from TMS at 0.00 ppm and referenced to the  $\text{CDCl}_3$  at 7.26 ppm (for  $^1\text{H}$  NMR) or 77.0 ppm (for euteriochloroform). Data are reported as: multiplicity (s = singlet, d = doublet, t = triplet, q = quartet, m = multiplet), coupling constant in hertz (Hz) and signal area integration in natural numbers.  $^{13}\text{C}$  NMR and  $^{31}\text{P}$  NMR analyses were run with decoupling. Enantiomeric excess values were determined by Daicel chiral column on an Agilent 1260 Series HPLC instrument. Optical rotations  $[\alpha]_D$  were measured on a PERKIN ELMER polarimeter 343 instrument.

## II. General procedure for the synthesis of compounds 1 and 3

### General Procedure for (*E*)-3,5-dimethyl-1-(3-butanonyl)pyrazoles:

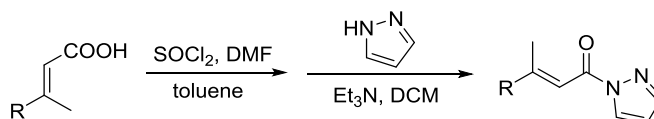

To a solution of the carboxylic acid <sup>[1]</sup> in toluene at room temperature under  $\text{N}_2$  was added dropwise of  $\text{SOCl}_2$  (200 mmol) followed by a catalytic amount of dry DMF. The reaction was allowed to stir at 80 °C for 2h. Toluene and excess sulfoxide chloride was removed by distillation and the result acid chloride was used immediately without further purification. To a solution of acid chloride in DCM, pyrazole (22 mmol) and  $\text{Et}_3\text{N}$  (40 mmol) were added to the solution at 0 °C. After stirring at room temperature for 1 h, the reaction mixture was poured into water and extracted with dichloromethane. The combined extracts were washed with brine, dried with magnesium sulfate, and evaporated in vacuo. The residue was purified by FC (silica gel, petroleum ether/ethyl acetate = 20:1) to provide pure (*E*)- $\beta$ -arylbut-2-enoic pyrazolamide.

### General Procedure for (*E*)- $\beta$ -substituted methacrylic pyrazolamide:

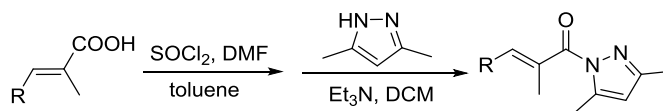

To a solution of the carboxylic acid <sup>[2]</sup> in toluene at rt under an atmosphere of N<sub>2</sub> was added dropwise of SOCl<sub>2</sub> (200 mmol) followed by a catalytic amount of dry DMF. The reaction was allowed to stir at 80 °C for 2h. Toluene and excess sulfoxide chloride was removed by distillation and the result acid chloride was used immediately without further purification. To a solution of acid chloride in DCM, pryzole (22 mmol) and Et<sub>3</sub>N (40 mmol) were added to the solution at 0°C. After stirring at room temperature for 1 h, the reaction mixture was poured into water and extracted with dichloromethane. The combined extracts were washed with brine, dried with magnesium sulfate, and evaporated in vacuo. The residue was purified by FC(silicagel, petroleum ether/ethyl acetate = 20:1) to provide analytically (*E*)- $\beta$ -substituted methacrylic pyrazolamide.

#### (*E*)-3-phenyl-1-(1H-pyrazol-1-yl)but-2-en-1-one **1a**

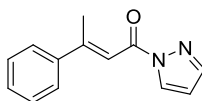

Light yellow solid; yield: 80%; <sup>1</sup>H NMR (400 MHz, CDCl<sub>3</sub>)  $\delta$  = 8.38 (s, 1H), 7.73 (s, 1H), 7.62-7.60 (m, 3H), 7.42-7.41 (m, 3H), 6.47-6.46 (m, 1H), 2.74 (s, 3H); <sup>13</sup>C NMR (101 MHz, CDCl<sub>3</sub>)  $\delta$  = 163.3, 160.5, 143.4, 142.2, 129.7, 128.6, 128.5, 126.7, 114.8, 109.4, 19.0; ESI-HRMS Calculated for C<sub>13</sub>H<sub>13</sub>N<sub>2</sub>O<sup>+</sup>([M+H]<sup>+</sup>): 213.1022, found 213.1018.

#### (*Z*)-3-phenyl-1-(1H-pyrazol-1-yl)but-2-en-1-one **1a-1**

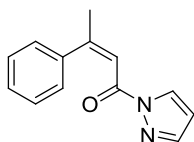

Yellow oil; yield: 10%; <sup>1</sup>H NMR (400 MHz, CDCl<sub>3</sub>)  $\delta$  = 8.13 (s, 1H), 7.66 (s, 1H), 7.33-7.27 (m, 3H), 7.21-7.18 (m, 3H), 6.33 (s, 1H), 2.27(s, 3H).

#### 1-(3,5-dimethyl-1H-pyrazol-1-yl)-3-phenylbut-3-en-1-one **1a-2**

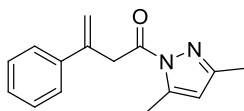

Yellow oil; yield: 10%;  $^1\text{H}$  NMR (400 MHz,  $\text{CDCl}_3$ )  $\delta$  = 7.50-7.48 (m, 2H), 7.35-7.29 (m, 3H), 5.97 (s, 1H), 5.63 (s, 1H), 5.26 (s, 1H), 4.37 (s, 2H), 2.49 (s, 3H), 2.27 (s, 3H).

**(E)-1-(1H-pyrazol-1-yl)-3-p-tolylbut-2-en-1-one 1b**

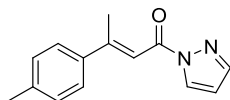

White solid; yield: 70%;  $^1\text{H}$  NMR (400 MHz,  $\text{CDCl}_3$ )  $\delta$  = 8.38 (d,  $J$  = 4.0 Hz, 1H), 7.73 (s, 1H), 7.61 (s, 1H), 7.54 (d,  $J$  = 8.0 Hz, 2H), 7.22 (d,  $J$  = 8.0 Hz, 2H), 6.46-6.45 (m, 1H), 2.72 (s, 3H), 2.39 (s, 3H);  $^{13}\text{C}$  NMR (101 MHz,  $\text{CDCl}_3$ )  $\delta$  = 163.3, 160.5, 143.3, 140.1, 139.2, 129.3, 128.5, 126.6, 113.8, 109.3, 21.3, 18.8; ESI-HRMS Calculated for  $\text{C}_{14}\text{H}_{15}\text{N}_2\text{O}^+([\text{M}+\text{H}]^+)$ : 227.1179, found 227.1175.

**(E)-1-(1H-pyrazol-1-yl)-3-m-tolylbut-2-en-1-one 1c**

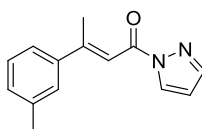

Colorless oil; yield: 80%;  $^1\text{H}$  NMR (400 MHz,  $\text{CDCl}_3$ )  $\delta$  = 8.38 (s, 1H), 7.73 (s, 1H), 7.59 (s, 1H), 7.42 (m, 2H), 7.30-7.23 (m, 2H), 6.46-6.45 (m, 1H), 2.72 (s, 3H), 2.41 (s, 3H);  $^{13}\text{C}$  NMR (101 MHz,  $\text{CDCl}_3$ )  $\delta$  = 163.3, 160.9, 143.3, 142.2, 138.3, 130.5, 128.5, 127.3, 123.8, 114.5, 109.4, 21.5, 19.1; ESI-HRMS Calculated for  $\text{C}_{14}\text{H}_{15}\text{N}_2\text{O}^+([\text{M}+\text{H}]^+)$ : 227.1179, found 227.1175.

**(E)-3-(4-methoxyphenyl)-1-(1H-pyrazol-1-yl)but-2-en-1-one 1d**

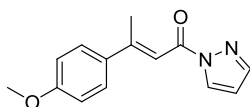

Colorless solid; yield: 80%;  $^1\text{H}$  NMR (400 MHz,  $\text{CDCl}_3$ )  $\delta$  = 8.38 (d,  $J$  = 4.0 Hz, 1H), 7.72 (s, 1H), 7.63-7.59 (m, 3H), 6.93 (d,  $J$  = 8.0 Hz, 2H), 6.46-6.45 (m, 1H), 3.85 (s, 3H), 2.73 (s, 3H);  $^{13}\text{C}$  NMR (101 MHz,  $\text{CDCl}_3$ )  $\delta$  = 163.4, 161.1, 160.0, 143.2, 134.2, 128.5, 128.2, 114.0, 112.7, 109.2, 55.4, 18.6; ESI-HRMS Calculated for  $\text{C}_{14}\text{H}_{15}\text{N}_2\text{O}_2^+([\text{M}+\text{H}]^+)$ : 243.1128, found 243.1125.

(*E*)-3-(3-methoxyphenyl)-1-(1H-pyrazol-1-yl)but-2-en-1-one **1e**

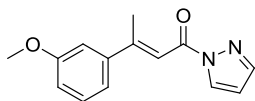

White solid; yield: 72%;  $^1\text{H}$  NMR (400 MHz,  $\text{CDCl}_3$ )  $\delta$  = 8.38 (s, 1H), 7.73 (s, 1H), 7.60 (s, 1H), 7.33 (t,  $J$  = 8.0 Hz, 1H), 7.21 (d,  $J$  = 8.0 Hz, 1H), 7.12 (s, 1H), 6.95 (d,  $J$  = 8.0 Hz, 1H), 6.46 (s, 1H), 3.86 (s, 3H), 2.72 (s, 3H);  $^{13}\text{C}$  NMR (101 MHz,  $\text{CDCl}_3$ )  $\delta$  = 163.2, 160.4, 159.7, 143.7, 143.4, 129.6, 128.5, 119.2, 115.0, 114.9, 112.5, 109.4, 55.4, 19.1; ESI-HRMS Calculated for  $\text{C}_{14}\text{H}_{15}\text{N}_2\text{O}_2^+([\text{M}+\text{H}]^+)$ : 243.1128, found 243.1124.

(*E*)-3-(4-chlorophenyl)-1-(1H-pyrazol-1-yl)but-2-en-1-one **1f**

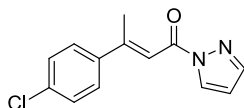

White solid; yield: 72%;  $^1\text{H}$  NMR (400 MHz,  $\text{CDCl}_3$ )  $\delta$  = 8.38 (d,  $J$  = 4.0 Hz, 1H), 7.74 (s, 1H), 7.59-7.55 (m, 3H), 7.39 (d,  $J$  = 8.0 Hz, 2H), 6.48-6.47 (m, 1H), 2.71 (s, 3H);  $^{13}\text{C}$  NMR (101 MHz,  $\text{CDCl}_3$ )  $\delta$  = 163.1, 158.9, 143.5, 140.5, 135.8, 128.8, 128.6, 128.0, 115.1, 109.6, 18.8; ESI-HRMS Calculated for  $\text{C}_{13}\text{H}_{12}\text{N}_2\text{OCl}^+([\text{M}+\text{H}]^+)$ : 247.0633, found 247.0630.

(*E*)-3-(3-chlorophenyl)-1-(1H-pyrazol-1-yl)but-2-en-1-one **1g**

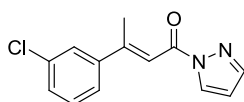

White solid; yield: 51%;  $^1\text{H}$  NMR (400 MHz,  $\text{CDCl}_3$ )  $\delta$  = 8.38 (d,  $J$  = 4.0 Hz, 1H), 7.74 (s, 1H), 7.58-7.57 (m, 2H), 7.50-7.47 (m, 1H), 7.39-7.33 (m, 2H), 6.48-6.47 (m, 1H), 2.70 (s, 3H);  $^{13}\text{C}$  NMR (101 MHz,  $\text{CDCl}_3$ )  $\delta$  = 163.0, 158.6, 144.0, 143.5, 129.9, 129.6, 128.6, 126.8, 124.8, 115.8, 109.6, 18.9; ESI-HRMS Calculated for  $\text{C}_{13}\text{H}_{12}\text{N}_2\text{OCl}^+([\text{M}+\text{H}]^+)$ : 247.0633, found 247.0630.

(*E*)-3-(4-fluorophenyl)-1-(1H-pyrazol-1-yl)but-2-en-1-one **1h**

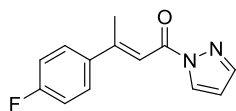

White solid; yield: 47%;  $^1\text{H}$  NMR (400 MHz,  $\text{CDCl}_3$ )  $\delta$  = 8.38 (d,  $J$  = 4.0 Hz, 1H), 7.74 (s, 1H), 7.62-7.57 (m, 3H), 7.13-7.09 (m, 2H), 6.47 (s, 1H), 2.72 (s, 3H);  $^{13}\text{C}$  NMR (101 MHz,  $\text{CDCl}_3$ )  $\delta$  = 163.7 (d,  $J$  = 249.0 Hz), 163.1, 159.1, 143.4, 138.1 (d,  $J$  = 3.0 Hz), 128.7, 128.6 (d,  $J$  = 4.0 Hz), 115.6 (d,  $J$  = 22.0 Hz), 114.6, 109.5, 18.9; ESI-HRMS Calculated for  $\text{C}_{13}\text{H}_{12}\text{N}_2\text{O}^+([\text{M}+\text{H}]^+)$ : 213.0928, found 213.0925.

**(E)-3-(4-isobutylphenyl)-1-(1H-pyrazol-1-yl)but-2-en-1-one 1i**

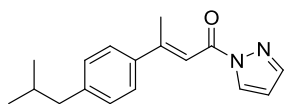

Dark yellow oil; yield: 47%;  $^1\text{H}$  NMR (400 MHz,  $\text{CDCl}_3$ )  $\delta$  = 8.39-8.38 (m, 1H), 7.73 (s, 1H), 7.62 (s, 1H), 7.56 (d,  $J$  = 4.0 Hz, 2H), 7.19 (d,  $J$  = 8.0 Hz, 2H), 6.46 (s, 1H), 2.74 (s, 3H), 2.51 (d,  $J$  = 8.0 Hz, 2H), 1.94-1.84 (m, 1H), 0.92 (d,  $J$  = 8.0 Hz, 6H);  $^{13}\text{C}$  NMR (101 MHz,  $\text{CDCl}_3$ )  $\delta$  = 163.3, 160.7, 143.9, 143.3, 139.4, 129.4, 128.5, 126.5, 113.8, 109.3, 45.2, 30.2, 22.4, 18.8; ESI-HRMS Calculated for  $\text{C}_{17}\text{H}_{21}\text{N}_2\text{O}^+([\text{M}+\text{H}]^+)$ : 269.1548, found 269.1641.

**(E)-1-(3,5-dimethyl-1H-pyrazol-1-yl)-2-methyl-3-phenylprop-2-en-1-one 3a**

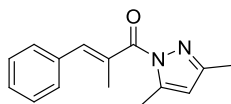

Colorless solid; yield: 75%;  $^1\text{H}$  NMR (400 MHz,  $\text{CDCl}_3$ )  $\delta$  = 7.48-7.46 (m, 2H), 7.40 (t,  $J$  = 8.0 Hz, 2H), 7.34-7.31 (m, 2H), 6.02 (s, 1H), 2.57 (s, 3H), 2.30 (s, 3H), 2.25 (s, 3H);  $^{13}\text{C}$  NMR (101 MHz,  $\text{CDCl}_3$ )  $\delta$  = 171.2, 151.7, 144.6, 139.9, 135.8, 131.8, 129.8, 128.3, 110.7, 16.4, 14.1, 13.9; ESI-HRMS Calculated for  $\text{C}_{15}\text{H}_{17}\text{N}_2\text{O}^+([\text{M}+\text{H}]^+)$ : 241.1335, found 241.1328.

**(E)-1-(3,5-dimethyl-1H-pyrazol-1-yl)-2-methyl-3-m-tolylprop-2-en-1-one 3e**

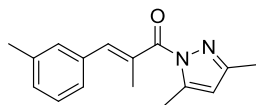

Colorless oil; yield: 70%;  $^1\text{H}$  NMR (400 MHz,  $\text{CDCl}_3$ )  $\delta$  = 7.30-7.27 (m, 4H), 7.14 (d,  $J$  = 8.0 Hz), 6.02 (s, 1H), 2.56 (s, 3H), 2.38 (s, 3H), 2.29 (s, 3H), 2.25 (s, 3H);  $^{13}\text{C}$  NMR (101 MHz,

CDCl<sub>3</sub>)  $\delta$  = 171.2, 151.7, 144.6, 140.3, 137.9, 135.7, 131.6, 130.6, 129.1, 128.2, 126.9, 110.7, 31.0, 21.5, 16.4, 14.1, 13.9; ESI-HRMS Calculated for C<sub>16</sub>H<sub>19</sub>N<sub>2</sub>O<sup>+</sup>([M+H]<sup>+</sup>): 255.1492, found 255.1486.

(*E*)-1-(3,5-dimethyl-1H-pyrazol-1-yl)-2-methyl-3-p-tolylprop-2-en-1-one **3f**

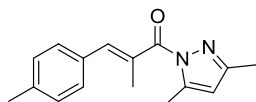

Colorless solid; yield: 75%; <sup>1</sup>H NMR (400 MHz, CDCl<sub>3</sub>)  $\delta$  = 7.37 (d, *J* = 8.0 Hz, 2H), 7.21 (d, *J* = 8.0 Hz, 2H), 6.01 (s, 1H), 2.56 (s, 3H), 2.37 (s, 3H), 2.29 (s, 3H), 2.25 (s, 3H); <sup>13</sup>C NMR (101 MHz, CDCl<sub>3</sub>)  $\delta$  = 171.3, 151.6, 144.6, 140.4, 138.5, 132.9, 130.8, 129.9, 129.1, 110.6, 21.4, 16.4, 14.1, 13.9; ESI-HRMS Calculated for C<sub>16</sub>H<sub>19</sub>N<sub>2</sub>O<sup>+</sup>([M+H]<sup>+</sup>): 255.1492, found 255.1484.

(*E*)-1-(3,5-dimethyl-1H-pyrazol-1-yl)-3-(3-methoxyphenyl)-2-methylprop-2-en-1-one **3g**

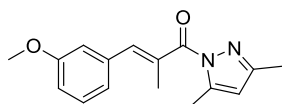

Colorless oil, yield: 66%; <sup>1</sup>H NMR (400 MHz, CDCl<sub>3</sub>)  $\delta$  = 7.34-7.27 (m, 2H), 7.06 (d, *J* = 8.0 Hz, 1H), 7.00 (s, 1H), 6.88 (d, *J* = 8.0 Hz, 1H), 6.02 (s, 1H), 3.83 (s, 3H), 2.57 (s, 3H), 2.29 (s, 3H), 2.25 (s, 3H); <sup>13</sup>C NMR (101 MHz, CDCl<sub>3</sub>)  $\delta$  = 171.1, 159.4, 151.8, 144.6, 139.7, 137.1, 132.2, 129.3, 122.3, 115.1, 114.0, 110.8, 55.3, 16.4, 14.1, 13.9; ESI-HRMS Calculated for C<sub>16</sub>H<sub>19</sub>N<sub>2</sub>O<sub>2</sub><sup>+</sup>([M+H]<sup>+</sup>): 271.1441, found 271.1434.

(*E*)-1-(3,5-dimethyl-1H-pyrazol-1-yl)-3-(4-methoxyphenyl)-2-methylprop-2-en-1-one **3h**

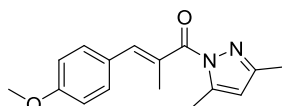

Colorless solid; yield: 70%; <sup>1</sup>H NMR (400 MHz, CDCl<sub>3</sub>)  $\delta$  = 7.45 (d, *J* = 8.0 Hz, 2H), 7.31 (s, 1H), 6.93 (d, *J* = 8.0 Hz, 2H), 6.01 (s, 1H), 3.84 (s, 3H), 2.55 (s, 3H), 2.30 (s, 3H), 2.25 (s, 3H); <sup>13</sup>C NMR (101 MHz, CDCl<sub>3</sub>)  $\delta$  = 171.3, 159.7, 151.5, 144.5, 140.5, 131.7, 129.4, 128.4, 113.8, 110.5, 55.3, 16.4, 14.0, 13.9; ESI-HRMS Calculated for C<sub>16</sub>H<sub>19</sub>N<sub>2</sub>O<sub>2</sub><sup>+</sup>([M+H]<sup>+</sup>): 271.1441, found 271.1434.

(*E*)-1-(3,5-dimethyl-1H-pyrazol-1-yl)-3-(4-fluorophenyl)-2-methylprop-2-en-1-one **3i**

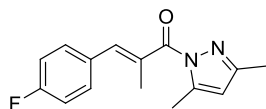

White solid; yield: 54%;  $^1\text{H}$  NMR (400 MHz,  $\text{CDCl}_3$ )  $\delta$  = 7.47-7.44 (m, 2 H), 7.27 (s, 1H), 7.12-7.07 (m, 2H), 6.02 (s, 1H), 2.57 (s, 3H), 2.28 (s, 3H), 2.25 (s, 3H);  $^{13}\text{C}$  NMR (101 MHz,  $\text{CDCl}_3$ )  $\delta$  = 171.0, 162.5 (d,  $J$  = 248.0 Hz), 151.8, 144.7, 138.6, 131.7, 131.6, 115.5, 115.3, 110.8, 16.3, 14.1, 13.9; ESI-HRMS Calculated for  $\text{C}_{15}\text{H}_{16}\text{N}_2\text{O}^+([\text{M}+\text{H}]^+)$ : 259.1241, found 259.1236.

(*E*)-3-(4-chlorophenyl)-1-(3,5-dimethyl-1H-pyrazol-1-yl)-2-methylprop-2-en-1-one **3j**

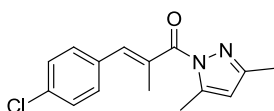

White solid; yield: 54%;  $^1\text{H}$  NMR (400 MHz,  $\text{CDCl}_3$ )  $\delta$  = 7.41-7.35 (m, 4H), 7.25-7.24 (m, 1H), 6.02 (s, 1H), 2.57 (s, 3H), 2.27 (s, 3H), 2.25 (s, 3H);  $^{13}\text{C}$  NMR (101 MHz,  $\text{CDCl}_3$ )  $\delta$  = 170.1, 151.9, 144.7, 138.2, 134.19, 134.15, 132.6, 131.1, 128.6, 110.9, 16.4, 14.1, 13.9; ESI-HRMS Calculated for  $\text{C}_{15}\text{H}_{16}\text{N}_2\text{OCl}^+([\text{M}+\text{H}]^+)$ : 275.0946, found 275.0939.

(*E*)-1-(3,5-dimethyl-1H-pyrazol-1-yl)-3-(furan-2-yl)-2-methylprop-2-en-1-one **3k**

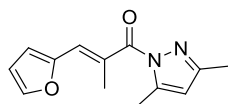

Dark yellow solid; yield: 30%;  $^1\text{H}$  NMR (400 MHz,  $\text{CDCl}_3$ )  $\delta$  = 7.55 (d,  $J$  = 4.0 Hz, 1H); 7.23 (s, 1H), 6.65 (d,  $J$  = 4.0 Hz, 1H); 6.52-6.50(m, 1H), 6.02 (s, 1H), 2.54 (s, 3H), 2.35 (s, 3H), 2.25 (s, 3H);  $^{13}\text{C}$  NMR (101 MHz,  $\text{CDCl}_3$ )  $\delta$  = 170.6, 151.8, 151.5, 144.6, 144.1, 128.5, 127.9, 115.1, 112.2, 110.6, 16.4, 14.0, 13.9; ESI-HRMS Calculated for  $\text{C}_{13}\text{H}_{15}\text{N}_2\text{O}_2^+([\text{M}+\text{H}]^+)$ : 231.1128, found 231.1123.

(*E*)-3-cyclohexyl-1-(3,5-dimethyl-1H-pyrazol-1-yl)-2-methylprop-2-en-1-one **3l**

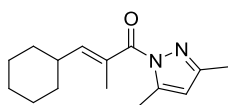

Colorless oil; yield: 10%;  $^1\text{H}$  NMR (400 MHz,  $\text{CDCl}_3$ )  $\delta$  = 5.99 (s, 1H), 5.52 (d,  $J$  = 8.0 Hz, 1H), 2.58 (s, 3H), 2.24 (s, 3H), 2.04 (s, 3H), 1.70-1.02 (m, 11H).



1-(3,5-dimethyl-1H-pyrazol-1-yl)-2-methyl-3-phenylbut-2-en-1-one **3m**

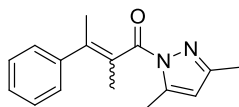

Yellow oil; yield: 45%;  $^1\text{H}$  NMR (400 MHz,  $\text{CDCl}_3$ )  $\delta$  = 7.40-7.36 (m, 2H), 7.32-7.26 (m, 3H), 6.00 (s, 1H), 2.61 (s, 3H), 2.25 (s, 3H), 1.96 (s, 3H), 1.91 (s, 3H).

### III. General procedure for asymmetric hydrogenation of compounds **1** and **3**

#### General procedure for asymmetric hydrogenation of compound **1**

In the nitrogen-filled glovebox, a solution of **L3** (1.1 eqv.) and  $\text{Rh}(\text{COD})_2\text{BF}_4$  (4.9 mg, 0.006 mmol) in 1.2 mL anhydrous EtOH /  $\text{CH}_2\text{Cl}_2$  (5:1 v/v) was stirred at room temperature for 30 min. 0.4 mL (for substrates **1**) of the resulting solution was transferred by syringe into a vial charged with **1** (0.1 mmol) in 0.6 mL anhydrous EtOH/ $\text{CH}_2\text{Cl}_2$  (5:1 v/v). The vials were transferred to an autoclave, which was then charged with 50 atm of  $\text{H}_2$  and stirred at room temperature for 24 h. The hydrogen gas was released slowly and the solution was concentrated and passed through a short column of silica gel to remove the metal complex. The product was analyzed by NMR spectroscopy for conversion and chiral HPLC for ee values. The absolute configuration was assigned by comparison of the corresponding chiral carboxylic acid with the  $[\alpha]_D^{20}$  that reported in the literature.<sup>[3]</sup>

#### General procedure for asymmetric hydrogenation of compound **3**

In the nitrogen-filled glovebox, a solution of **L3** (1.1 eqv.) and  $\text{Rh}(\text{NBD})_2\text{BF}_4$  (4.9 mg, 0.006 mmol) in 1.2 mL anhydrous  $\text{CH}_2\text{Cl}_2$  was stirred at room temperature for 30 min. 0.2 mL (for substrates **3**) of the resulting solution was transferred by syringe into a vial charged with **3** (0.1 mmol) in 0.8 mL anhydrous  $\text{CH}_2\text{Cl}_2$ . The vials were transferred to an autoclave, which was then charged with 50 atm of  $\text{H}_2$  and stirred at room temperature for 12 h. The hydrogen gas was released slowly and the solution was concentrated and passed through a short column of silica gel to remove the metal complex. The product was analyzed by NMR spectroscopy for conversion

and chiral HPLC for ee values. The absolute configuration was assigned by comparison of the corresponding chiral carboxylic acid with the  $[\alpha]_D^{20}$  that reported in the literature.<sup>[4]</sup>

**(R)-3-phenyl-1-(1H-pyrazol-1-yl)butan-1-one 2a**

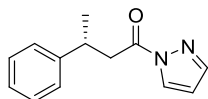

The title compound was purified by flash silica gel chromatography to afford the product. The eluent was petroleum ether: ethyl acetate = 10:1(V/V). Colorless oil; >99% conversion; 20.1 mg, 94% yield; 96% ee;  $[\alpha]_D^{25} = 5.25$  ( $c = 0.4$ ,  $\text{CHCl}_3$ ); The enantiomeric excess was determined by HPLC on Chiralpak OJ-H column, hexane: isopropanol = 95:5; flow rate = 1.0 mL/min; UV detection at 240 nm;  $t_R = 16.77$  min (major), 18.71 min (minor).  $^1\text{H}$  NMR (400 MHz,  $\text{CDCl}_3$ )  $\delta = 8.21$  (d,  $J = 4.0$  Hz, 1H), 7.70 (s, 1H), 7.30-7.20 (m, 5H), 6.42 (s, 1H), 3.53-3.47 (m, 1H), 3.43-3.38 (m, 1H), 1.38 (d,  $J = 4.0$  Hz, 3H);  $^{13}\text{C}$  NMR (101 MHz,  $\text{CDCl}_3$ )  $\delta = 170.9, 145.6, 143.9, 128.6, 128.3, 126.9, 126.5, 109.6, 42.1, 35.9, 22.1$ ; ESI-HRMS Calculated for  $\text{C}_{13}\text{H}_{15}\text{N}_2\text{O}^+ ([\text{M}+\text{H}]^+)$ : 215.1176; found 215.1179.

**(R)-1-(1H-pyrazol-1-yl)-3-p-tolylbutan-1-one 2b**

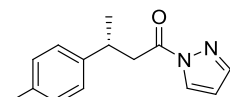

The title compound was purified by flash silica gel chromatography to afford the product. The eluent was petroleum ether: ethyl acetate = 10:1(V/V). Colorless oil; >99% conversion; 21.7 mg, 95% yield; 92% ee;  $[\alpha]_D^{25} = 2.00$  ( $c = 0.4$ ,  $\text{CHCl}_3$ ); The enantiomeric excess was determined by HPLC on Chiralpak OJ-H column, hexane: isopropanol = 90:10; flow rate = 0.6 mL/min; UV detection at 240 nm;  $t_R = 20.93$  min (minor), 22.02 min (major).  $^1\text{H}$  NMR (400 MHz,  $\text{CDCl}_3$ )  $\delta = 8.22$  (d,  $J = 4.0$  Hz, 1H), 7.70 (s, 1H), 7.18 (d,  $J = 8.0$  Hz, 2H), 7.11 (d,  $J = 8.0$  Hz, 2H), 6.42 (d,  $J = 4.0$  Hz, 1H), 3.51-3.45 (m, 2H), 3.41-3.34 (m, 1H), 2.31 (s, 3H), 1.35 (d,  $J = 8.0$  Hz, 3H);  $^{13}\text{C}$  NMR (101 MHz,  $\text{CDCl}_3$ )  $\delta = 170.9, 143.9, 142.6, 136.0, 129.2, 128.3, 126.8, 109.6, 42.1, 35.5, 22.3, 21.1$ ; ESI-HRMS Calculated for  $\text{C}_{14}\text{H}_{17}\text{N}_2\text{O}^+ ([\text{M}+\text{H}]^+)$ : 229.1331, found 229.1335.

**(R)-1-(1H-pyrazol-1-yl)-3-m-tolylbutan-1-one 2c**

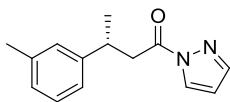

The title compound was purified by flash silica gel chromatography to afford the product. The eluent was petroleum ether: ethyl acetate = 10:1(V/V). Colorless oil; >99% conversion; 22.1 mg, 97% yield; 93% ee;  $[\alpha]_D^{25} = 2.00$  ( $c = 0.4$ ,  $\text{CHCl}_3$ ); The enantiomeric excess was determined by HPLC on Chiralpak OJ-H column, hexane: isopropanol = 90:10; flow rate = 0.6 mL/min; UV detection at 240 nm;  $t_R = 14.73$  min (major), 15.74 min (minor).  $^1\text{H}$  NMR (400 MHz,  $\text{CDCl}_3$ )  $\delta = 8.23$  (d,  $J = 4.0$  Hz, 1H), 7.71 (s, 1H), 7.19-7.17 (m, 1H), 7.10-7.01 (m, 3H), 6.43-6.42 (m, 1H), 3.51-3.45 (m, 2H), 3.42-3.38 (m, 1H), 2.33 (s, 3H), 1.36 (d,  $J = 8.0$  Hz, 3H);  $^{13}\text{C}$  NMR (101 MHz,  $\text{CDCl}_3$ )  $\delta = 170.9$ , 145.6, 143.9, 138.1, 128.4, 128.3, 127.7, 127.2, 123.9, 109.6, 42.0, 35.8, 22.2, 21.5; ESI-HRMS Calculated for  $\text{C}_{14}\text{H}_{17}\text{N}_2\text{O}^+([\text{M}+\text{H}]^+)$ : 229.1332, found 229.1335.

**(R)-3-(4-methoxyphenyl)-1-(1H-pyrazol-1-yl)butan-1-one 2d**

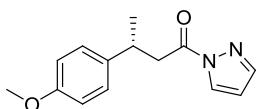

The title compound was purified by flash silica gel chromatography to afford the product. The eluent was petroleum ether: ethyl acetate = 10:1(V/V). Colorless oil; >99% conversion; 22.9 mg, 94% yield; 93% ee;  $[\alpha]_D^{25} = 1.50$  ( $c = 0.4$ ,  $\text{CHCl}_3$ ); The enantiomeric excess was determined by HPLC on Chiralpak AD-H column, hexane: isopropanol = 90:10; flow rate = 0.6 mL/min; UV detection at 240 nm;  $t_R = 32.97$  min (major), 36.70 min (minor).  $^1\text{H}$  NMR (400 MHz,  $\text{CDCl}_3$ )  $\delta = 8.21$  (s, 1H), 7.70 (s, 1H), 7.21 (d,  $J = 8.0$  Hz, 2H), 6.84 (d,  $J = 8.0$  Hz, 2H), 6.42 (d,  $J = 4.0$  Hz, 1H), 3.78 (s, 3H), 3.48-3.43 (m, 2H), 3.39-3.32 (m, 1H), 1.35 (d,  $J = 8.0$  Hz, 3H);  $^{13}\text{C}$  NMR (101 MHz,  $\text{CDCl}_3$ )  $\delta = 170.9$ , 158.1, 143.9, 137.7, 128.3, 127.8, 113.9, 109.6, 55.2, 42.3, 35.1, 22.3; ESI-HRMS Calculated for  $\text{C}_{14}\text{H}_{17}\text{N}_2\text{O}_2^+([\text{M}+\text{H}]^+)$ : 245.1281, found 245.1285.

**(R)-3-(3-methoxyphenyl)-1-(1H-pyrazol-1-yl)butan-1-one 2e**

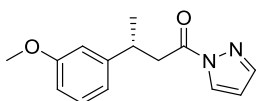

The title compound was purified by flash silica gel chromatography to afford the product. The eluent was petroleum ether: ethyl acetate = 10:1(V/V). Colorless oil; >99% conversion; 22.7 mg, 93%

yield; 94% ee;  $[\alpha]_{\text{D}}^{25} = 4.00$  ( $c = 0.4$ ,  $\text{CHCl}_3$ ); The enantiomeric excess was determined by HPLC on Chiralpak OJ-H column, hexane: isopropanol = 90:10; flow rate = 0.6 mL/min; UV detection at 240 nm;  $t_{\text{R}} = 22.64$  min (major), 26.43 min (minor).  $^1\text{H}$  NMR (400 MHz,  $\text{CDCl}_3$ )  $\delta = 8.22$  (s, 1H), 7.70 (s, 1H), 7.22 (t,  $J = 8.0$  Hz, 1H), 6.90-6.88 (m, 1H), 6.83 (s, 1H), 6.76-6.73 (m, 1H), 6.42 (s, 1H), 3.79 (s, 3H), 3.52-3.47 (m, 2H), 3.41-3.34 (m, 1H), 1.37 (d,  $J = 4.0$  Hz, 3H);  $^{13}\text{C}$  NMR (101 MHz,  $\text{CDCl}_3$ )  $\delta = 170.8$ , 159.7, 147.3, 143.9, 129.5, 128.3, 119.3, 112.8, 111.6, 109.6, 55.2, 42.0, 35.9, 22.1; ESI-HRMS Calculated for  $\text{C}_{14}\text{H}_{17}\text{N}_2\text{O}_2^+$  ( $[\text{M}+\text{H}]^+$ ): 245.1279, found 245.1284.

**(R)-3-(4-chlorophenyl)-1-(1H-pyrazol-1-yl)butan-1-one 2f**

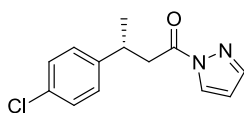

The title compound was purified by flash silica gel chromatography to afford the product. The eluent was petroleum ether: ethyl acetate = 10:1(V/V). Colorless oil; >99% conversion; 23.9 mg, 96% yield; 90% ee;  $[\alpha]_{\text{D}}^{25} = 5.75$  ( $c = 0.4$ ,  $\text{CHCl}_3$ ); The enantiomeric excess was determined by HPLC on Chiralpak OJ-H column, hexane: isopropanol = 90:10; flow rate = 0.6 mL/min; UV detection at 240 nm;  $t_{\text{R}} = 14.08$  min (minor), 15.40 min (major).  $^1\text{H}$  NMR (400 MHz,  $\text{CDCl}_3$ )  $\delta = 8.21$  (d,  $J = 4.0$  Hz, 1H), 7.70 (s, 1H), 7.27-7.23 (m, 4H), 6.43 (t,  $J = 4.0$  Hz, 1H), 3.52-3.45 (m, 2H), 3.40-3.33 (m, 1H), 1.36 (d,  $J = 4.0$  Hz, 1H);  $^{13}\text{C}$  NMR (101 MHz,  $\text{CDCl}_3$ )  $\delta = 170.6$ , 144.0, 132.1, 128.7, 128.28, 128.31, 109.7, 89.7, 41.9, 35.3, 22.1; ESI-HRMS Calculated for  $\text{C}_{13}\text{H}_{14}\text{N}_2\text{OCl}^+$  ( $[\text{M}+\text{H}]^+$ ): 249.0783, found 249.0789.

**(R)-3-(3-chlorophenyl)-1-(1H-pyrazol-1-yl)butan-1-one 2g**

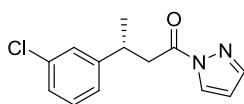

The title compound was purified by flash silica gel chromatography to afford the product. The eluent was petroleum ether: ethyl acetate = 10:1(V/V). Colorless oil; >99% conversion; 23.4 mg, 94% yield; 95% ee;  $[\alpha]_{\text{D}}^{25} = 3.00$  ( $c = 0.4$ ,  $\text{CHCl}_3$ ); The enantiomeric excess was determined by HPLC on Chiralpak OJ-H column, hexane: isopropanol = 90:10; flow rate = 1.0 mL/min; UV detection at 240 nm;  $t_{\text{R}} = 4.73$  min (major), 5.29 min (minor).  $^1\text{H}$  NMR (400 MHz,  $\text{CDCl}_3$ )  $\delta = 8.13$  (s, 1H), 7.62 (s, 1H), 7.19-7.15 (m, 4H), 6.35 (s, 1H), 3.42-3.38 (m, 2H), 3.32-3.25 (m, 1H), 1.28 (d,  $J = 8.0$  Hz, 3H);

$^{13}\text{C}$  NMR (101 MHz,  $\text{CDCl}_3$ )  $\delta$  = 170.5, 147.7, 144.0, 134.3, 129.8, 128.3, 127.2, 126.7, 125.2, 109.7, 41.8, 35.6, 22.0; ESI-HRMS Calculated for  $\text{C}_{13}\text{H}_{14}\text{N}_2\text{OCl}^+([\text{M}+\text{H}]^+)$ : 249.0783, found 249.0789.

**(R)-3-(4-fluorophenyl)-1-(1H-pyrazol-1-yl)butan-1-one 2h**

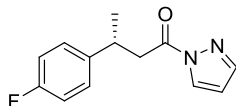

The title compound was purified by flash silica gel chromatography to afford the product. The eluent was petroleum ether: ethyl acetate = 10:1(V/V). Colorless oil; >99% conversion; 22.0 mg, 95% yield; 92% ee;  $[\alpha]_{\text{D}}^{25}$  = 6.50 ( $c$  = 0.4,  $\text{CHCl}_3$ ); The enantiomeric excess was determined by HPLC on Chiralpak OJ-H column, hexane: isopropanol = 98:2; flow rate = 0.6 mL/min; UV detection at 240 nm;  $t_{\text{R}}$  = 24.63 min (minor), 27.02 min (major).  $^1\text{H}$  NMR (400 MHz,  $\text{CDCl}_3$ )  $\delta$  = 8.21 (d,  $J$  = 4.0 Hz, 1H), 7.70 (s, 1H), 7.27-7.23 (m, 2H), 6.99 (t,  $J$  = 8.0 Hz, 2H), 6.43-6.42 (m, 1H), 3.55-3.45 (m, 2H), 3.39-3.32 (m, 1H), 1.36 (d,  $J$  = 8.0 Hz, 3H);  $^{13}\text{C}$  NMR (101 MHz,  $\text{CDCl}_3$ )  $\delta$  = 170.7, 161.5 (d,  $J$  = 242.0 Hz), 144.0, 141.2, 128.2 (d,  $J$  = 8.1 Hz), 115.3 (d,  $J$  = 21.2 Hz), 109.7, 42.2, 35.2, 22.3; ESI-HRMS Calculated for  $\text{C}_{13}\text{H}_{14}\text{N}_2\text{O}^+([\text{M}+\text{H}]^+)$ : 233.1075, found 233.1085.

**(R)-3-(4-isobutylphenyl)-1-(1H-pyrazol-1-yl)butan-1-one 2i**

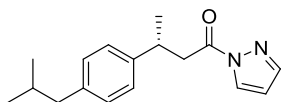

The title compound was purified by flash silica gel chromatography to afford the product. The eluent was petroleum ether: ethyl acetate = 10:1(V/V). Colorless oil; >99% conversion; 25.9 mg, 96% yield; 89% ee;  $[\alpha]_{\text{D}}^{25}$  = 3.25 ( $c$  = 0.4,  $\text{CHCl}_3$ ); The enantiomeric excess was determined by HPLC on Chiralpak OJ-H column, hexane: isopropanol = 95:5; flow rate = 0.6 mL/min; UV detection at 240 nm;  $t_{\text{R}}$  = 9.07 min (minor), 10.33 min (major).  $^1\text{H}$  NMR (400 MHz,  $\text{CDCl}_3$ )  $\delta$  = 8.26 (d,  $J$  = 4.0 Hz, 1H), 7.72 (s, 1H), 7.22 (d,  $J$  = 8.0 Hz, 2H), 7.10 (d,  $J$  = 8.0 Hz, 2H), 6.45-6.44 (m, 1H), 3.55-3.48 (m, 2H), 3.44-3.37 (m, 1H), 2.46 (d,  $J$  = 8.0 Hz, 2H), 1.88-1.84 (m, 1H), 1.40 (d,  $J$  = 4.0 Hz, 1H), 0.92 (d,  $J$  = 8.0 Hz, 6H);  $^{13}\text{C}$  NMR (101 MHz,  $\text{CDCl}_3$ )  $\delta$  = 171.0, 143.9, 142.8, 139.8, 129.2, 128.3, 126.6, 109.5, 45.1, 42.2, 35.5, 30.2, 22.4, 22.1; ESI-HRMS Calculated for  $\text{C}_{17}\text{H}_{23}\text{N}_2\text{O}^+([\text{M}+\text{H}]^+)$ : 271.1798, found 271.1805.

(*R*)-1-(3,5-dimethyl-1H-pyrazol-1-yl)-2-methyl-3-phenylpropan-1-one **4a**

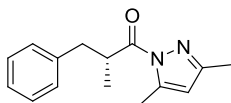

The title compound was purified by flash silica gel chromatography to afford the product. The eluent was petroleum ether: ethyl acetate = 10:1(V/V). Colorless oil; >99% conversion; 22.7 mg, 94% yield; 97% ee;  $[\alpha]_D^{25} = -26.50$  ( $c = 0.4$ ,  $\text{CHCl}_3$ ); The enantiomeric excess was determined by HPLC on Chiralpak OJ-H column, hexane: isopropanol = 98:2; flow rate = 1.0 mL/min; UV detection at 240 nm;  $t_R = 5.28$  min (minor), 7.00 min (major).  $^1\text{H}$  NMR (400 MHz,  $\text{CDCl}_3$ )  $\delta = 7.29$ -7.17 (m, 5H), 5.94 (s, 1H), 4.20-4.11 (m, 1H), 3.20-3.15 (m, 1H), 2.73-2.68 (m, 1H), 2.51 (s, 3H), 2.23 (s, 3H), 1.22 (d,  $J = 8.0$  Hz, 3H);  $^{13}\text{C}$  NMR (101 MHz,  $\text{CDCl}_3$ )  $\delta = 177.0$ , 151.7, 144.1, 139.6, 129.3, 128.3, 126.2, 111.1, 40.0, 39.4, 16.8, 14.7, 13.9; ESI-HRMS Calculated for  $\text{C}_{15}\text{H}_{19}\text{N}_2\text{O}^+([\text{M}+\text{H}]^+)$ : 243.1490, found 243.1492.

(*R*)-1-(3,5-dimethyl-1H-pyrazol-1-yl)-2-methyl-3-m-tolylpropan-1-one **4e**

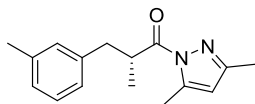

The title compound was purified by flash silica gel chromatography to afford the product. The eluent was petroleum ether: ethyl acetate = 10:1 (V/V). Colorless oil; >99% conversion; 23.8 mg, 93% yield; 94% ee;  $[\alpha]_D^{25} = -17.75$  ( $c = 0.4$ ,  $\text{CHCl}_3$ ); The enantiomeric excess was determined by HPLC on Chiralpak OJ-H column, hexane: isopropanol = 98:2; flow rate = 1.0 mL/min; UV detection at 240 nm;  $t_R = 4.65$  min (minor), 5.66 min (major).  $^1\text{H}$  NMR (400 MHz,  $\text{CDCl}_3$ )  $\delta = 7.17$ -7.14 (m, 1H), 7.04-6.99 (m, 3H), 5.94 (s, 1H), 4.18-4.10 (m, 1H), 3.16-3.11 (m, 1H), 2.69-2.64 (m, 1H), 2.52 (s, 3H), 2.32 (s, 3H), 2.24 (s, 3H), 1.22 (d,  $J = 4.0$  Hz, 3H);  $^{13}\text{C}$  NMR (101 MHz,  $\text{CDCl}_3$ )  $\delta = 177.1$ , 151.7, 144.1, 139.4, 137.8, 130.0, 128.1, 126.9, 126.3, 39.9, 39.3, 21.4, 16.8, 14.7, 13.9; ESI-HRMS Calculated for  $\text{C}_{16}\text{H}_{21}\text{N}_2\text{O}^+([\text{M}+\text{H}]^+)$ : 257.1642, found 257.1648.

(*R*)-1-(3,5-dimethyl-1H-pyrazol-1-yl)-2-methyl-3-p-tolylpropan-1-one **4f**

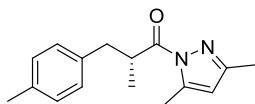

The title compound was purified by flash silica gel chromatography to afford the product. The eluent was petroleum ether: ethyl acetate = 10:1(V/V). Colorless oil; >99% conversion; 24.1 mg, 94% yield; 92% ee;  $[\alpha]_D^{25} = -24.00$  ( $c = 0.4$ ,  $\text{CHCl}_3$ ); The enantiomeric excess was determined by HPLC on Chiralpak OJ-H column, hexane: isopropanol = 98:2; flow rate = 1.0 mL/min; UV detection at 240 nm;  $t_R = 5.16$  min (minor), 6.91 min (major).  $^1\text{H}$  NMR (400 MHz,  $\text{CDCl}_3$ )  $\delta = 7.13$ -7.06 (m, 4H), 5.94 (s, 1H), 4.17-4.08 (m, 1H), 3.16-3.11 (m, 1H), 2.69-2.62 (m, 1H), 2.51 (s, 3H), 2.30 (s, 3H), 2.23 (s, 3H), 1.21 (d,  $J = 8.0$  Hz, 3H);  $^{13}\text{C}$  NMR (101 MHz,  $\text{CDCl}_3$ )  $\delta = 177.1$ , 151.7, 144.1, 136.4, 135.6, 129.1, 128.9, 111.1, 40.0, 38.9, 21.1, 16.8, 14.7, 13.9; ESI-HRMS Calculated for  $\text{C}_{16}\text{H}_{21}\text{N}_2\text{O}^+([\text{M}+\text{H}]^+)$ : 257.1643, found 257.1648.

**(R)-1-(3,5-dimethyl-1H-pyrazol-1-yl)-3-(3-methoxyphenyl)-2-methylpropan-1-one **4g****

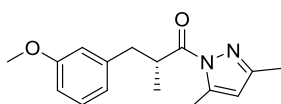

The title compound was purified by flash silica gel chromatography to afford the product. The eluent was petroleum ether: ethyl acetate = 10:1(V/V). Colorless oil; >99% conversion; 26.1 mg, 96% yield; 93% ee;  $[\alpha]_D^{25} = -19.75$  ( $c = 0.4$ ,  $\text{CHCl}_3$ ); The enantiomeric excess was determined by HPLC on Chiralpak OJ-H column, hexane: isopropanol = 98:2; flow rate = 1.0 mL/min; UV detection at 240 nm;  $t_R = 6.97$  min (minor), 8.69 min (major).  $^1\text{H}$  NMR (400 MHz,  $\text{CDCl}_3$ )  $\delta = 7.18$  (t,  $J = 8.0$  Hz, 1H), 6.83-6.80 (m, 2H), 6.75-6.72 (m, 1H), 5.94 (s, 1H), 4.19-4.11 (m, 1H), 3.78 (s, 3H), 3.18-3.13 (m, 1H), 2.71-2.65 (m, 1H), 2.52 (s, 3H), 2.23 (s, 3H), 1.23 (d,  $J = 8.0$  Hz, 3H);  $^{13}\text{C}$  NMR (101 MHz,  $\text{CDCl}_3$ )  $\delta = 177.0$ , 159.5, 151.8, 144.1, 141.2, 129.2, 121.7, 114.8, 111.6, 111.1, 55.1, 39.9, 39.4, 16.9, 14.7, 13.9; ESI-HRMS Calculated for  $\text{C}_{16}\text{H}_{21}\text{N}_2\text{O}_2^+([\text{M}+\text{H}]^+)$ : 273.1591, found 273.1598.

**(R)-1-(3,5-dimethyl-1H-pyrazol-1-yl)-3-(4-methoxyphenyl)-2-methylpropan-1-one **4h****

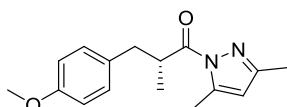

The title compound was purified by flash silica gel chromatography to afford the product. The eluent was petroleum ether: ethyl acetate = 10:1(V/V). Colorless oil; >99% conversion; 25.0 mg, 92%

yield; 91% ee;  $[\alpha]_D^{25} = -3.50$  ( $c = 0.4$ ,  $\text{CHCl}_3$ ); The enantiomeric excess was determined by HPLC on Chiralpak OJ-H column, hexane: isopropanol = 98:2; flow rate = 1.0 mL/min; UV detection at 240 nm;  $t_R = 8.75$  min (minor), 10.14 min (major).  $^1\text{H}$  NMR (400 MHz,  $\text{CDCl}_3$ )  $\delta = 7.14$  (d,  $J = 8.0$  Hz, 2H), 6.81 (d,  $J = 8.0$  Hz, 2H), 5.94 (s, 1H), 4.15-4.06 (m, 1H), 3.77 (s, 3H), 3.13-3.08 (m, 1H), 2.68-2.61 (m, 1H), 2.51 (s, 3H), 2.23 (s, 3H), 1.21 (d,  $J = 8.0$  Hz, 3H);  $^{13}\text{C}$  NMR (101 MHz,  $\text{CDCl}_3$ )  $\delta = 177.1, 158.0, 151.7, 144.1, 131.6, 130.2, 113.6, 111.1, 55.2, 40.2, 38.5, 16.8, 14.7, 13.9$ ; ESI-HRMS Calculated for  $\text{C}_{16}\text{H}_{21}\text{N}_2\text{O}_2^+([\text{M}+\text{H}]^+)$ : 273.1591, found 273.1598.

**(R)-1-(3,5-dimethyl-1H-pyrazol-1-yl)-3-(4-fluorophenyl)-2-methylpropan-1-one 4i**

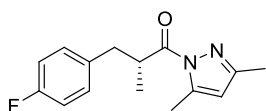

The title compound was purified by flash silica gel chromatography to afford the product. The eluent was petroleum ether: ethyl acetate = 10:1 (V/V). Colorless oil; >99% conversion; 22.7 mg, 94% yield; 98% ee;  $[\alpha]_D^{25} = -19.00$  ( $c = 0.4$ ,  $\text{CHCl}_3$ ); The enantiomeric excess was determined by HPLC on Chiralpak AD-H column, hexane: isopropanol = 99:1; flow rate = 1.0 mL/min; UV detection at 240 nm;  $t_R = 4.17$  min (minor), 4.57 min (major).  $^1\text{H}$  NMR (400 MHz,  $\text{CDCl}_3$ )  $\delta = 7.23$  (d,  $J = 12.0$  Hz, 2H), 7.16 (d,  $J = 12.0$  Hz, 2H), 5.94 (s, 1H), 4.17-4.08 (m, 1H), 3.16-3.11 (m, 1H), 2.71-2.66 (m, 1H), 2.51 (s, 3H), 2.23 (s, 3H), 1.22 (d,  $J = 8.0$  Hz, 3H);  $^{13}\text{C}$  NMR (101 MHz,  $\text{CDCl}_3$ )  $\delta = 176.8, 151.8, 144.1, 135.2, 130.6$  (d,  $J = 7.07\text{Hz}$ ), 114.8 (d,  $J = 11.11\text{Hz}$ ), 111.2, 40.1, 38.6, 16.9, 14.7, 13.9; ESI-HRMS Calculated for  $\text{C}_{15}\text{H}_{18}\text{N}_2\text{O}^+([\text{M}+\text{H}]^+)$ : 261.1393, found 261.1398.

**(R)-3-(4-chlorophenyl)-1-(3,5-dimethyl-1H-pyrazol-1-yl)-2-methylpropan-1-one 4j**

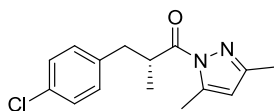

The title compound was purified by flash silica gel chromatography to afford the product. The eluent was petroleum ether: ethyl acetate = 10:1 (V/V). Colorless oil; >99% conversion; 26.8 mg, 97% yield; 98% ee;  $[\alpha]_D^{25} = -22.50$  ( $c = 0.4$ ,  $\text{CHCl}_3$ ); The enantiomeric excess was determined by HPLC on Chiralpak OJ-H column, hexane: isopropanol = 98:2; flow rate = 1.0 mL/min; UV detection at 240 nm;  $t_R = 5.13$  min (minor), 5.69 min (major).  $^1\text{H}$  NMR (400 MHz,  $\text{CDCl}_3$ )  $\delta = 7.20$ -7.16 (m, 2H), 6.96-6.92 (m, 2H), 5.94 (s, 1H), 4.17-4.08 (m, 1H), 3.16-3.11 (m, 1H), 2.71-2.66 (m, 1H), 2.51 (s,



3H), 2.23 (s, 3H), 1.22 (d,  $J = 8.0$  Hz, 3H);  $^{13}\text{C}$  NMR (101 MHz,  $\text{CDCl}_3$ )  $\delta = 176.6, 151.9, 144.1, 138.1, 132.0, 130.6, 128.4, 111.3, 39.9, 38.8, 38.7, 17.0, 14.7, 13.9$ ; ESI-HRMS Calculated for  $\text{C}_{15}\text{H}_{18}\text{N}_2\text{OCl}^+([\text{M}+\text{H}]^+)$ : 276.7611, found 276.7612.

(*R*)-1-(3,5-dimethyl-1H-pyrazol-1-yl)-3-(furan-2-yl)-2-methylpropan-1-one **4k**

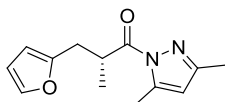

The title compound was purified by flash silica gel chromatography to afford the product. The eluent was petroleum ether: ethyl acetate = 10:1 (V/V). Colorless oil; >99% conversion; 22.0 mg, 95% yield; 99% ee;  $[\alpha]_{\text{D}}^{25} = -7.00$  ( $c = 0.4$ ,  $\text{CHCl}_3$ ); The enantiomeric excess was determined by HPLC on Chiralpak OJ-H column, hexane: isopropanol = 98:2; flow rate = 1.0 mL/min; UV detection at 240 nm;  $t_{\text{R}} = 5.68$  min (minor), 7.44 min (major).  $^1\text{H}$  NMR (400 MHz,  $\text{CDCl}_3$ )  $\delta = 7.29\text{--}7.28$  (m, 1H), 6.25–6.24 (m, 1H), 6.03 (m, 1H), 5.96 (s, 1H), 4.24–4.19 (m, 1H), 3.17–3.11 (m, 1H), 2.86–2.81 (m, 1H), 2.53 (s, 3H), 2.24 (s, 3H), 1.27 (d,  $J = 8.0$  Hz, 3H);  $^{13}\text{C}$  NMR (101 MHz,  $\text{CDCl}_3$ )  $\delta = 176.6, 153.4, 151.9, 144.2, 141.3, 111.2, 110.1, 106.5, 37.7, 31.5, 17.4, 14.7, 13.9$ ; ESI-HRMS Calculated for  $\text{C}_{13}\text{H}_{17}\text{N}_2\text{O}_2^+([\text{M}+\text{H}]^+)$ : 233.1282, found 233.1285.

(*R*)-3-cyclohexyl-1-(3,5-dimethyl-1H-pyrazol-1-yl)-2-methylpropan-1-one **4l**

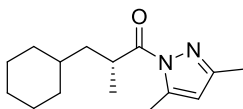

The title compound was purified by flash silica gel chromatography to afford **4l** (>99% conversion, 92% yield). The product **4l** was transformed to the corresponding acid by the procedure IV, and then the acid was methyl esterified by diazomethane. The enantiomeric excess (33% ee) of the resulted methyl ester was determined by Supelco's Beta Dex 120 column Temperature program: 80  $^{\circ}\text{C}$ , 0.5  $^{\circ}\text{C}/\text{min}$  to 150  $^{\circ}\text{C}$ , stay 10 mins, Flow rate = 1.0 mL/min,  $t_{\text{R}} = 55.3$  min (major), 56.0 min (minor). **4l**:  $[\alpha]_{\text{D}}^{25} = -1.25$  ( $c = 0.4$ ,  $\text{CHCl}_3$ ).  $^1\text{H}$  NMR (400 MHz,  $\text{CDCl}_3$ )  $\delta = 5.89$  (s, 1H), 2.46 (s, 3H), 2.17 (s, 3H), 1.66–1.59 (m, 8H), 1.26–1.21 (m, 6H), 1.14 (d,  $J = 8.0$  Hz, 3H).

#### IV. Procedure for the transformation of hydrogenation product **2b**

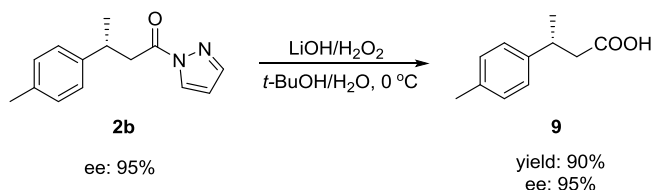

To the solution of 30 %  $\text{H}_2\text{O}_2$  (0.05 mL) in water (0.16 mL)/*t*-BuOH (0.16 mL) was added LiOH/ $\text{H}_2\text{O}$  (6.4 mg, 0.15 mmol) at 0 °C. The reaction mixture was stirred at 0 °C for 5 min, and (*R*)-1-(1H-pyrazol-1-yl)-3-p-tolylbutan-1-one **2b** (90.6 mg, 0.1 mmol) was added. After completion monitored by TLC then carefully treated with a saturated aqueous solution of  $\text{Na}_2\text{S}_2\text{O}_3$  (0.3 mL) followed by 2 M aqueous solution of HCl (1 mL). The mixture was extracted with EtOAc (3 x 5 mL), dried over  $\text{MgSO}_4$ , and removed under reduced pressure to give the crude carboxylic acid product **9**.<sup>[5]</sup> White solid; yield: 90%;  $[\alpha]_{\text{D}}^{20} = -35.0$  ( $c = 1.00$ ,  $\text{CHCl}_3$ );  $^1\text{H}$  NMR (400 MHz,  $\text{CDCl}_3$ )  $\delta = 7.11$  (s, 4 H), 3.26-3.12 (m, 1H), 2.64 (dd,  $J = 8.0, 16.0$  Hz, 1H), 2.55 (dd,  $J = 8.0, 16.0$  Hz, 1H);  $^{13}\text{C}$  HNMR (101 MHz,  $\text{CDCl}_3$ )  $\delta = 21.0, 22.0, 35.8, 42.8, 126.6, 129.2, 136.0, 142.5, 178.3$ . The enantiomeric excess was determined with its diazomethane esterifying methyl derivative by HPLC on Chiralpak OJ-H column, hexane: isopropanol = 95:5; flow rate = 0.6 mL/min; UVdetection at 210 nm;  $t_{\text{R}} = 15.4$  min (major), 16.5 min (minor).

## V. NMR spectra

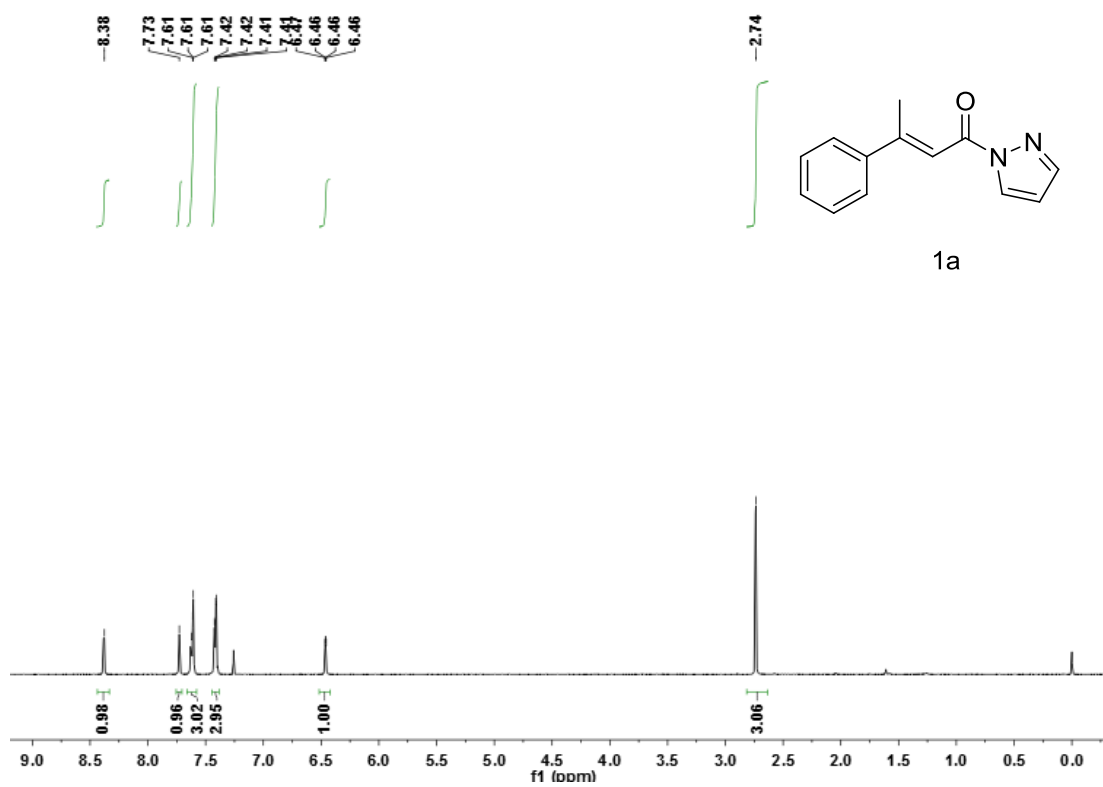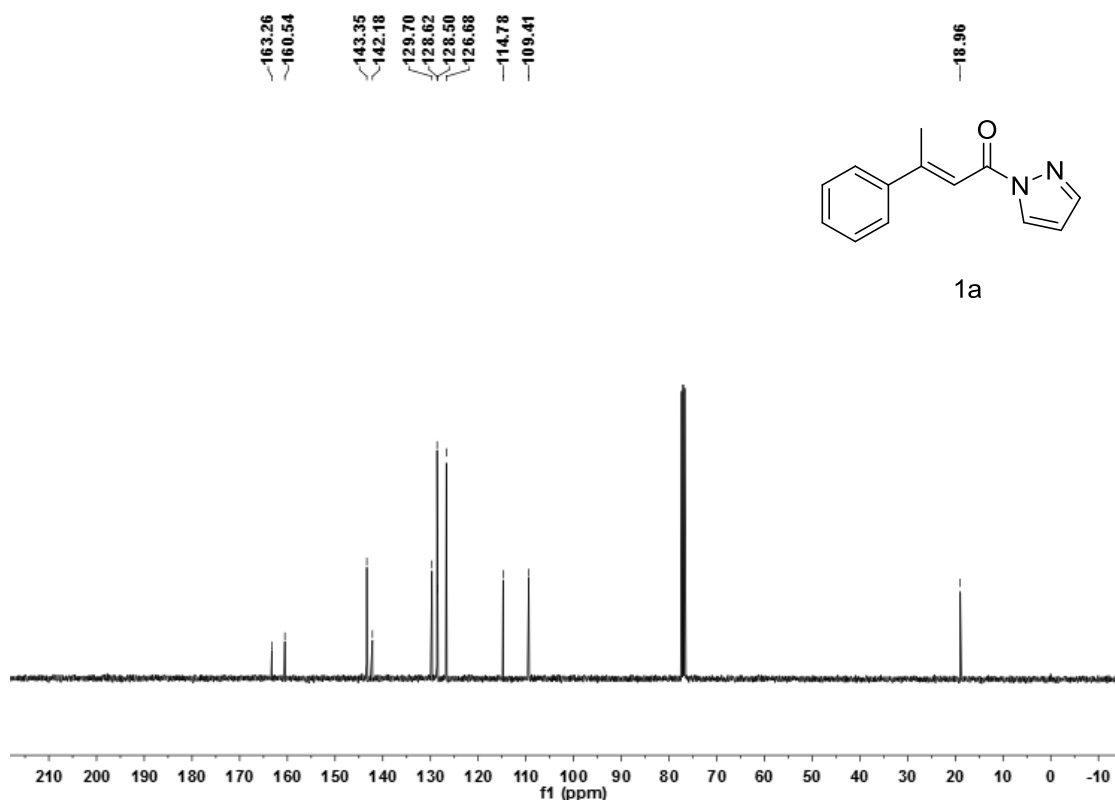

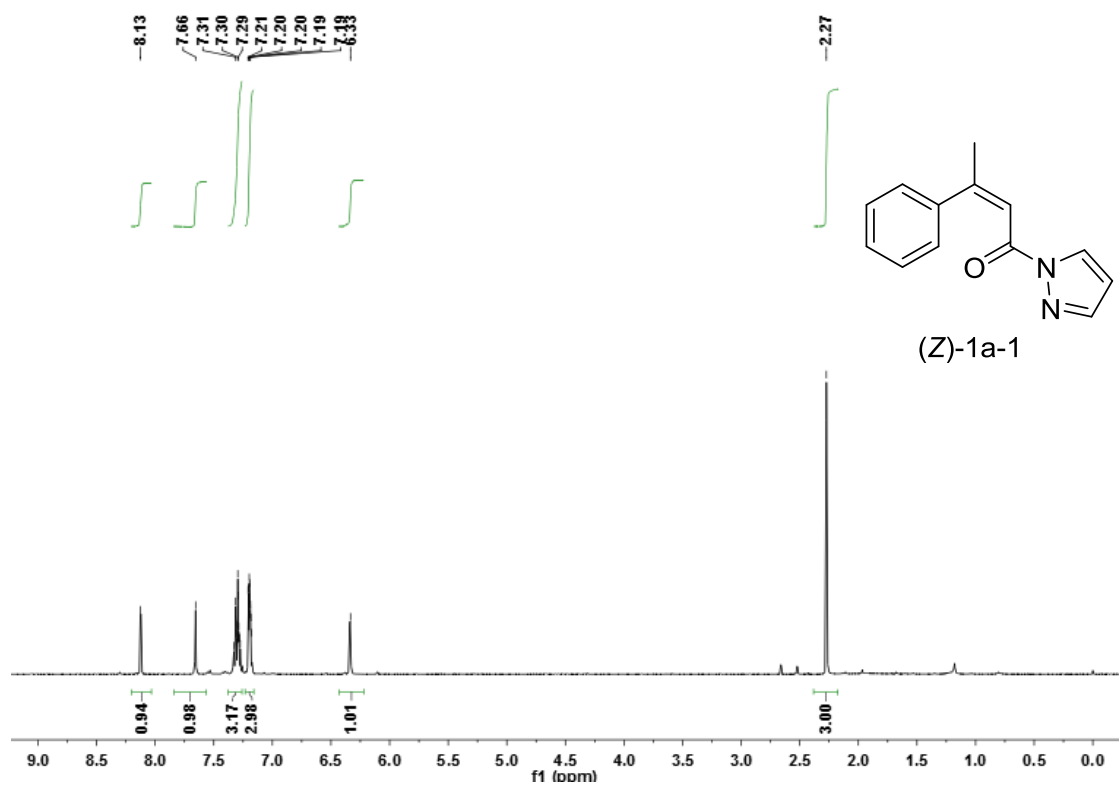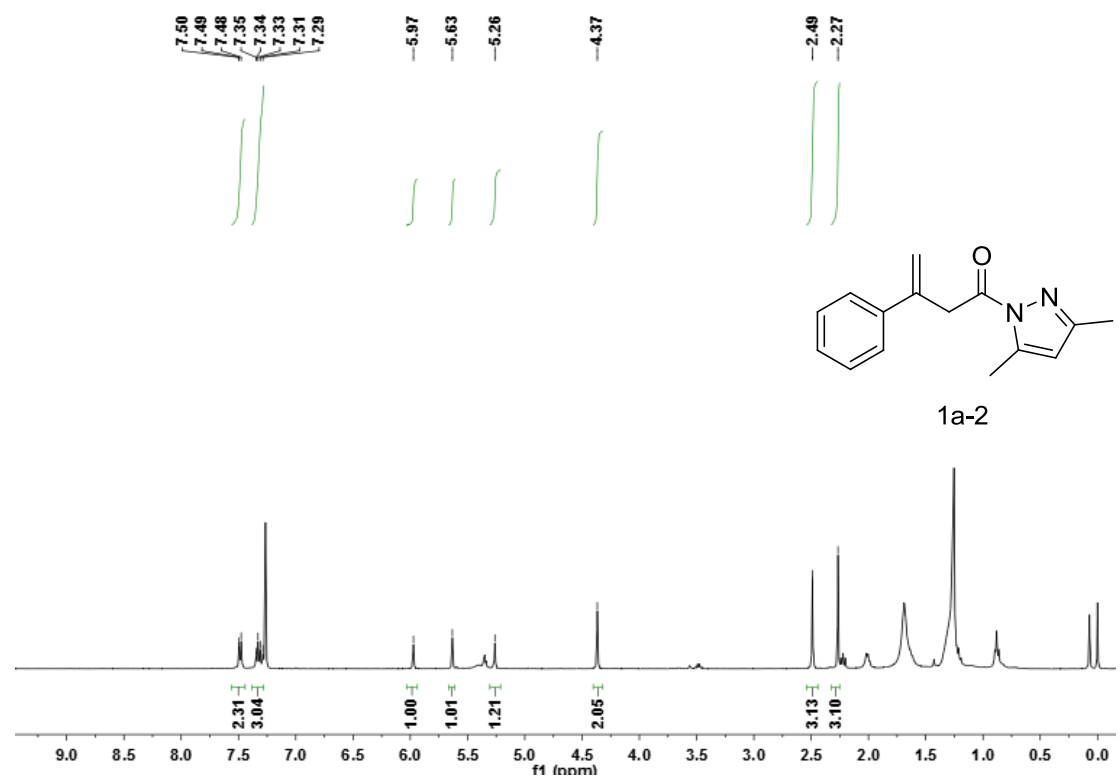

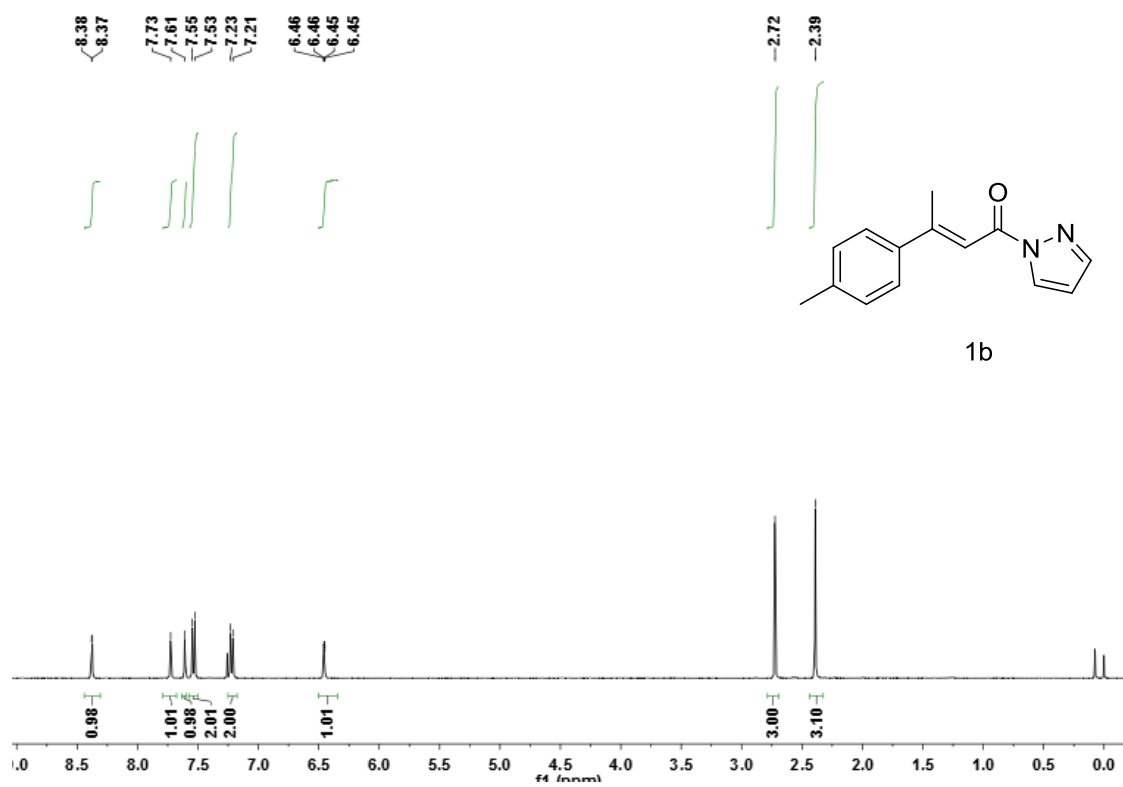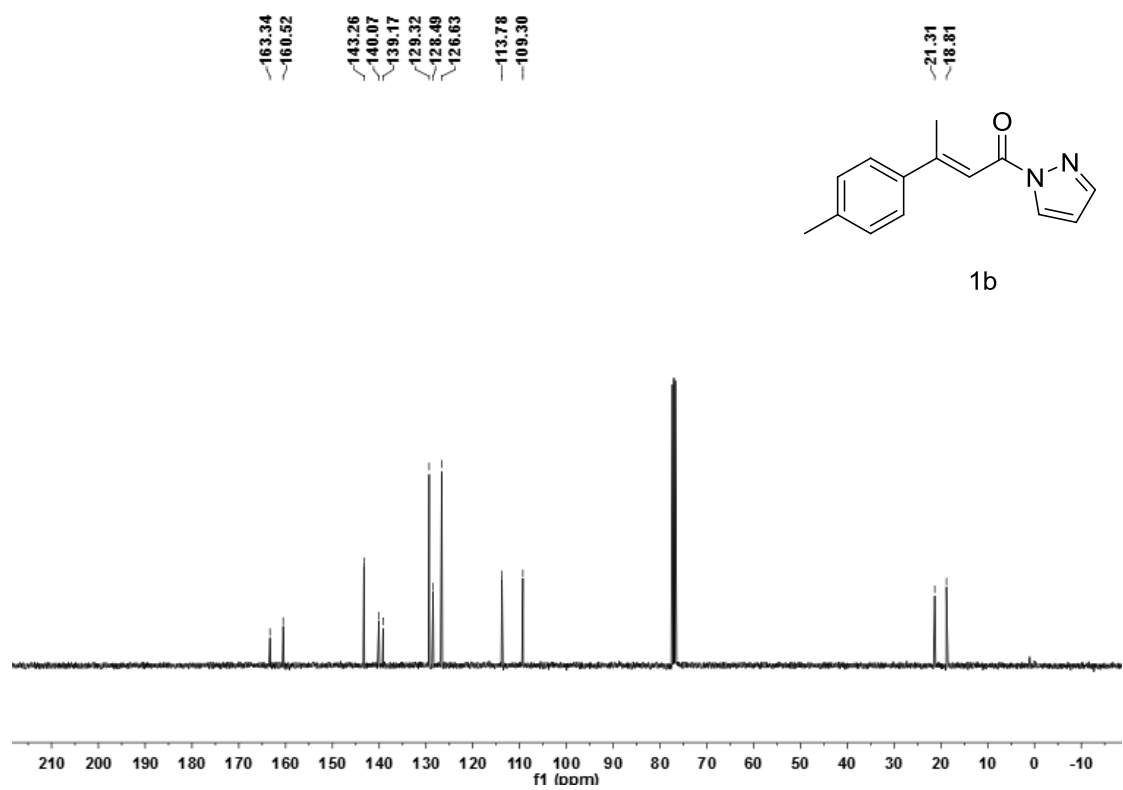

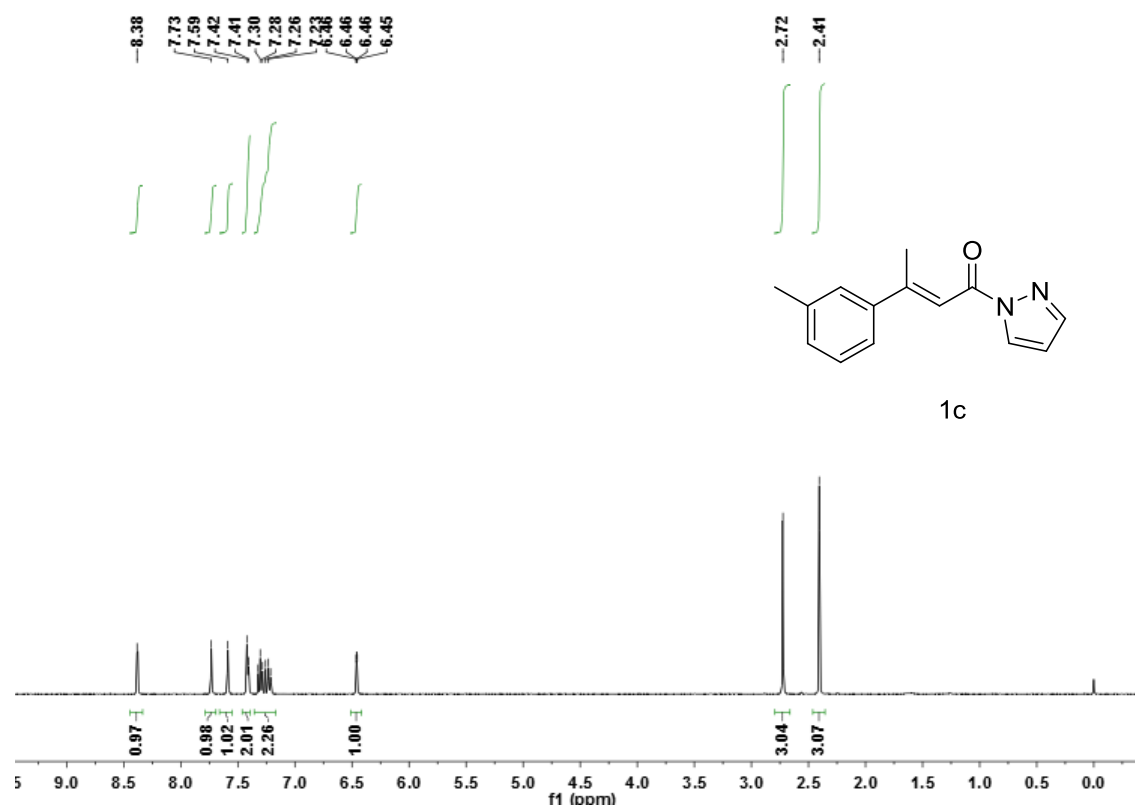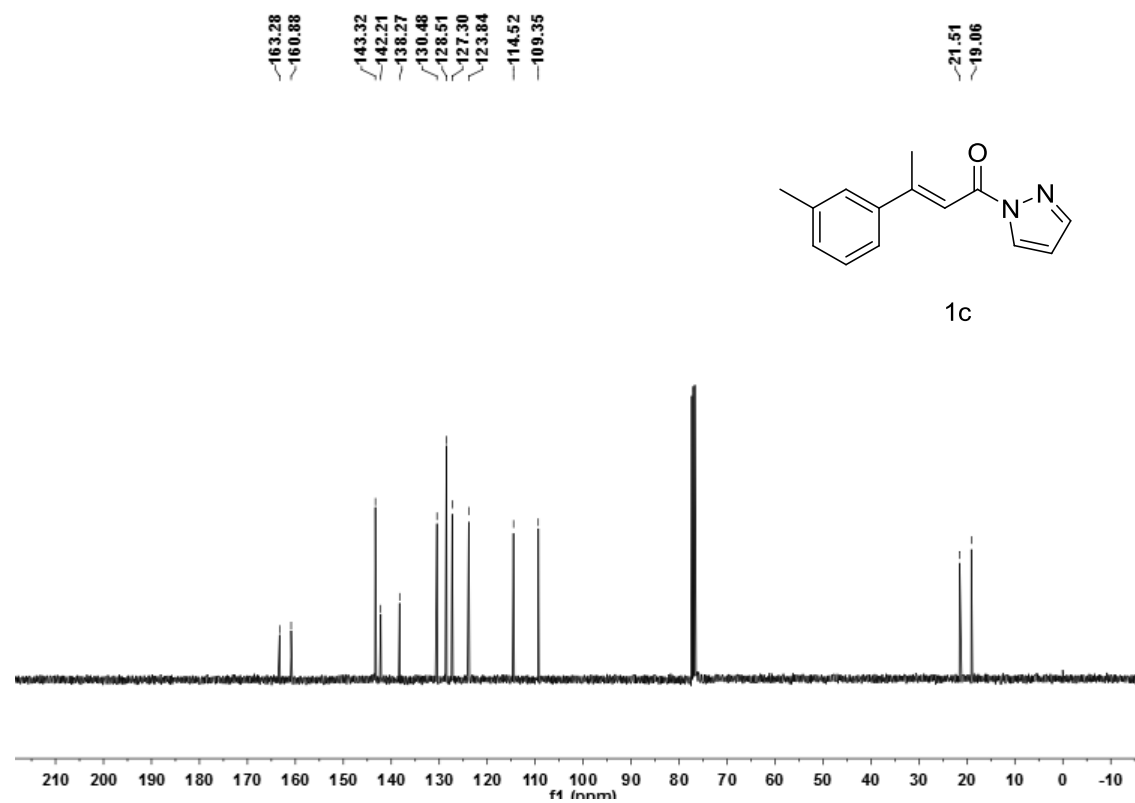

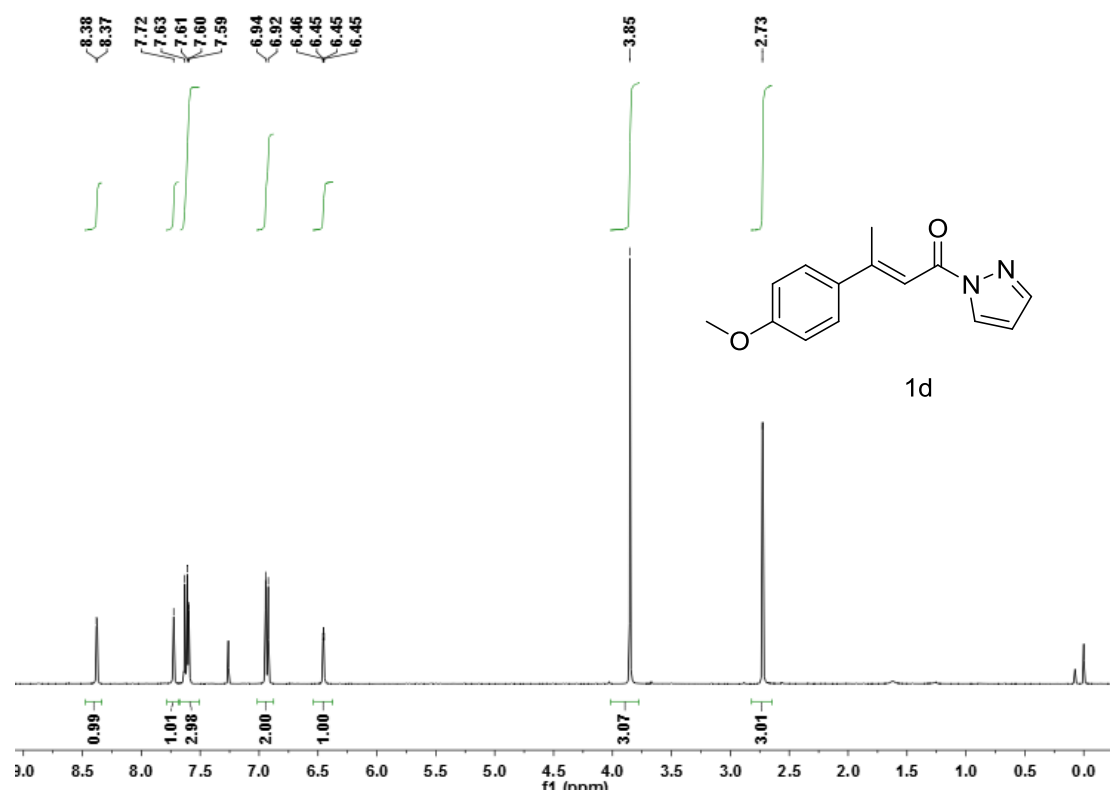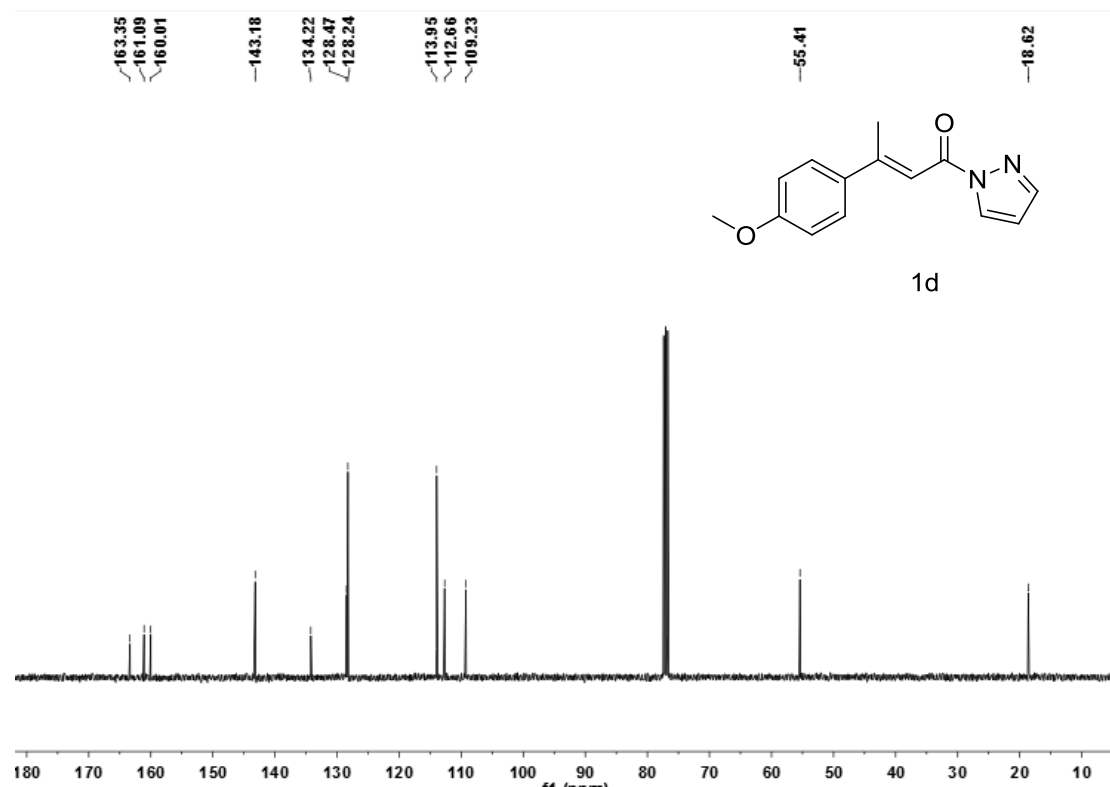

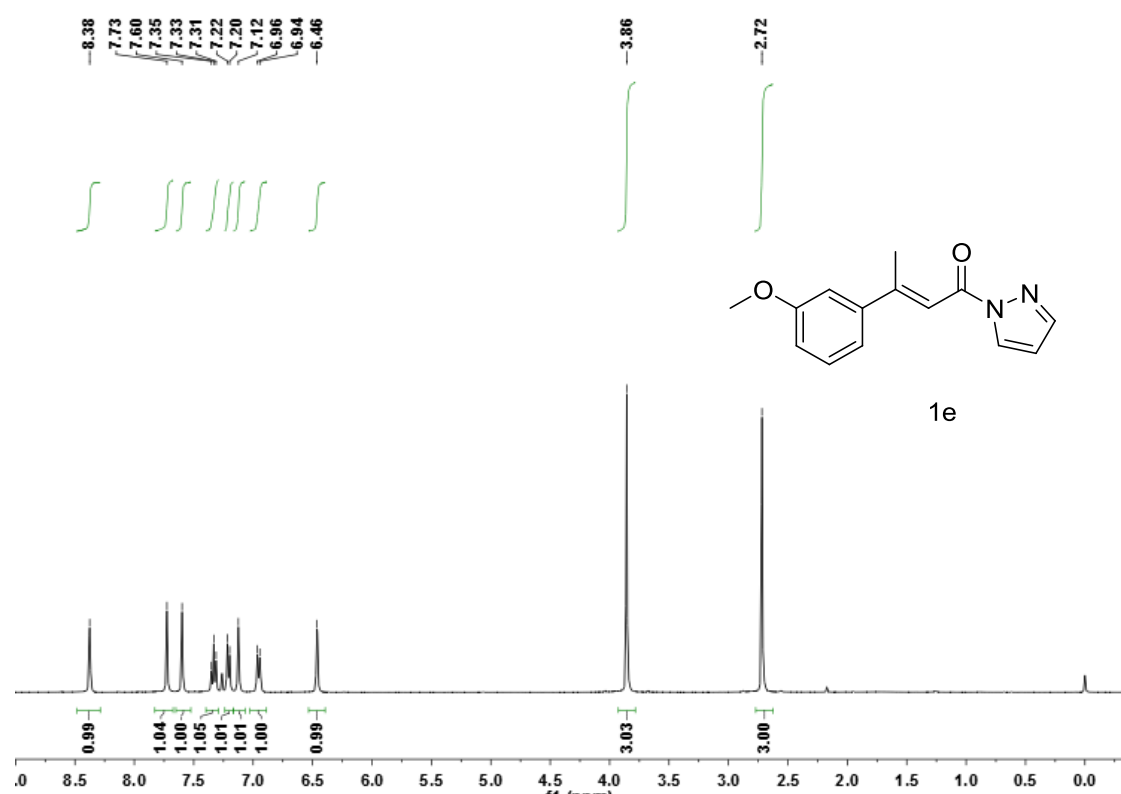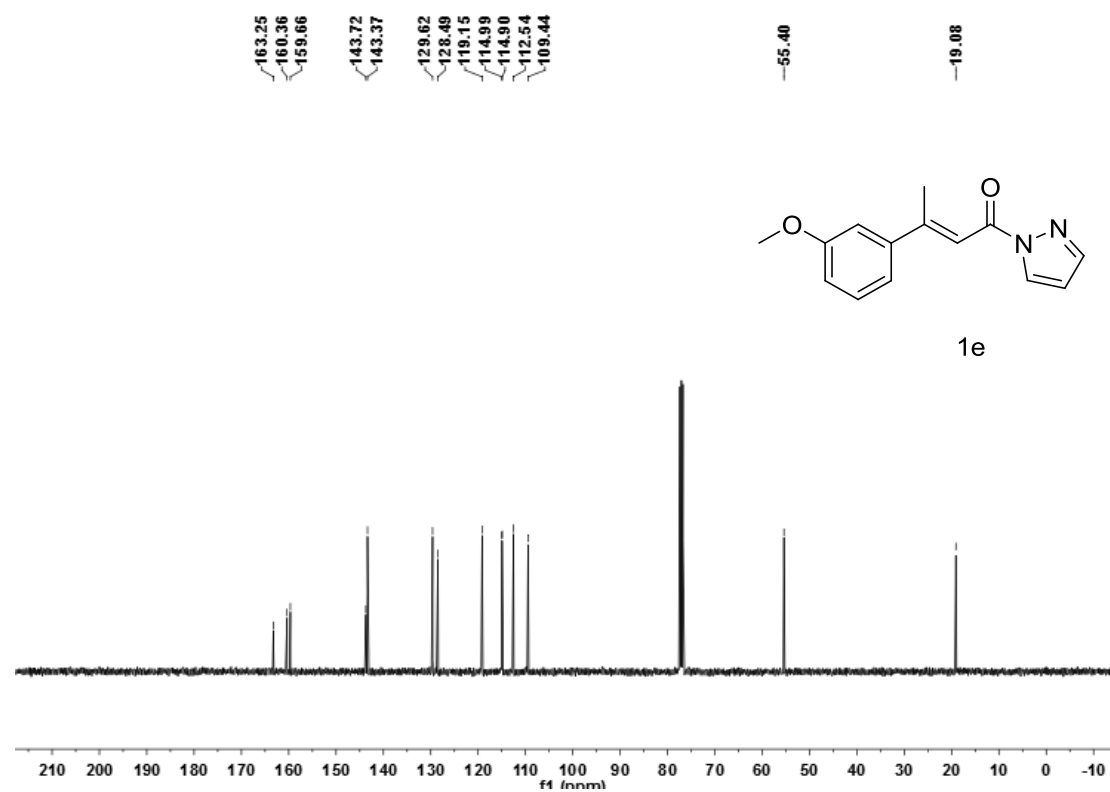



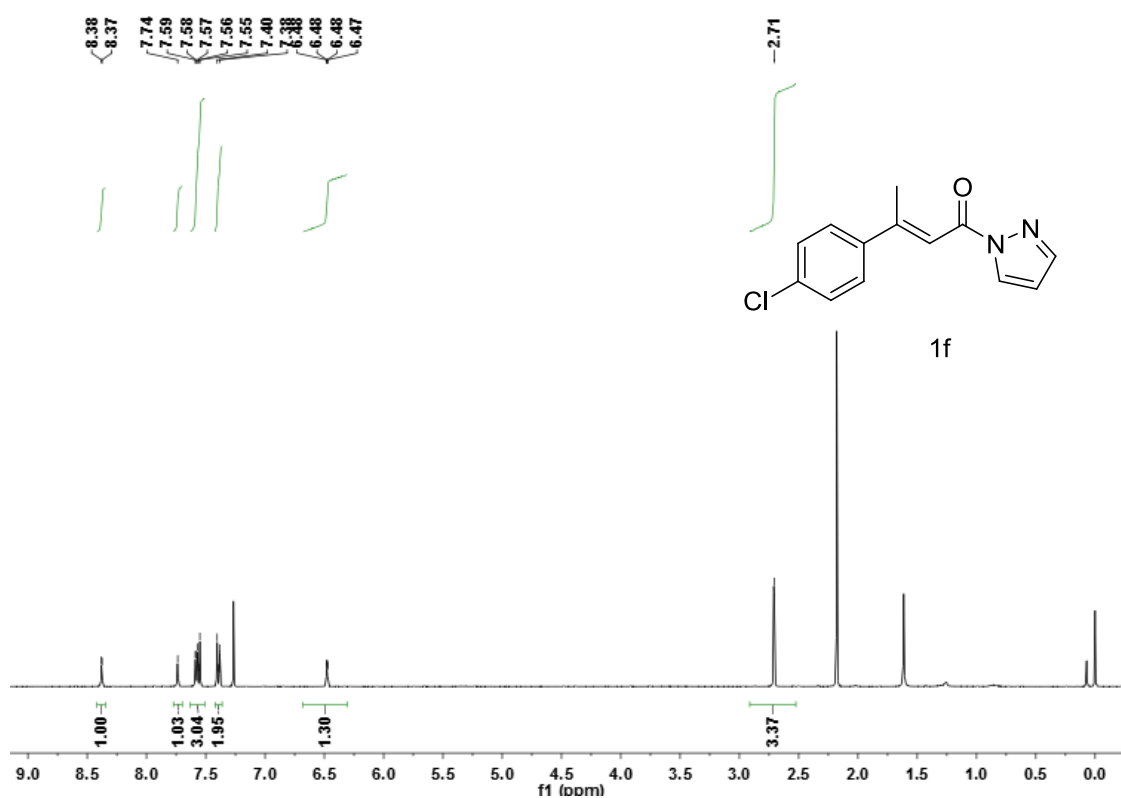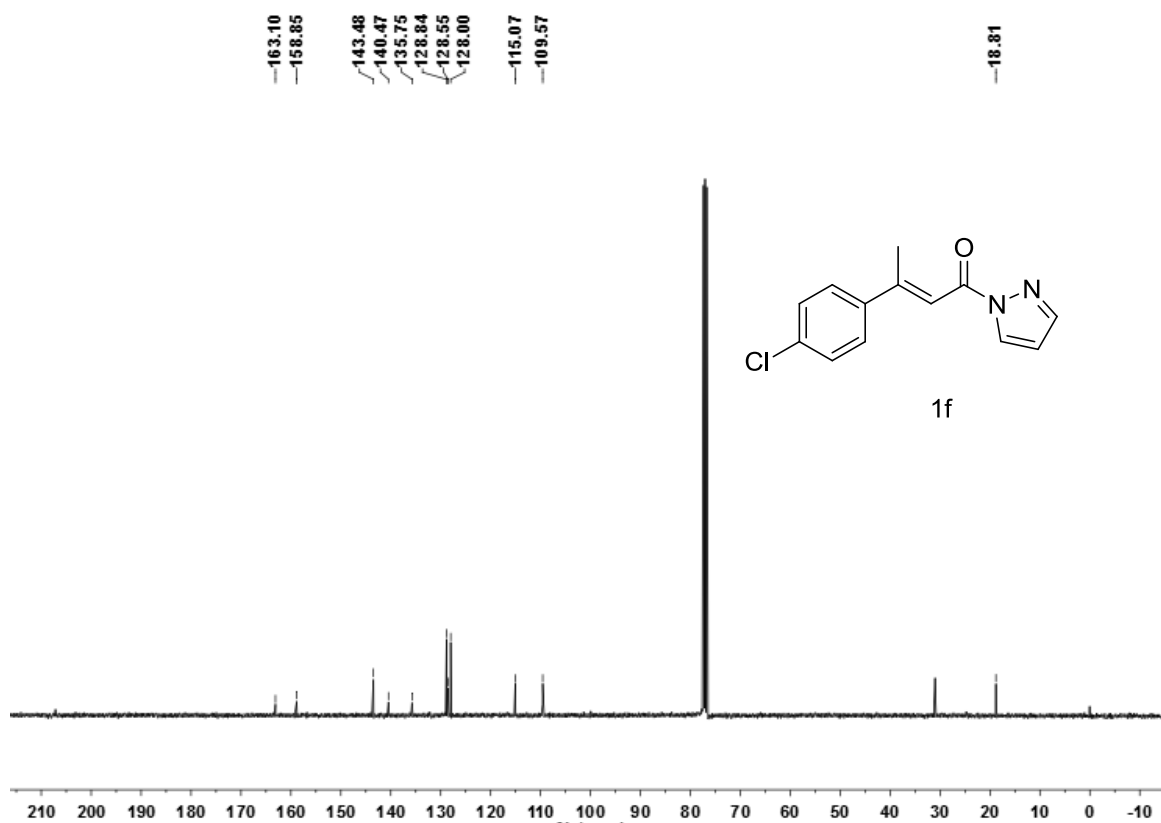

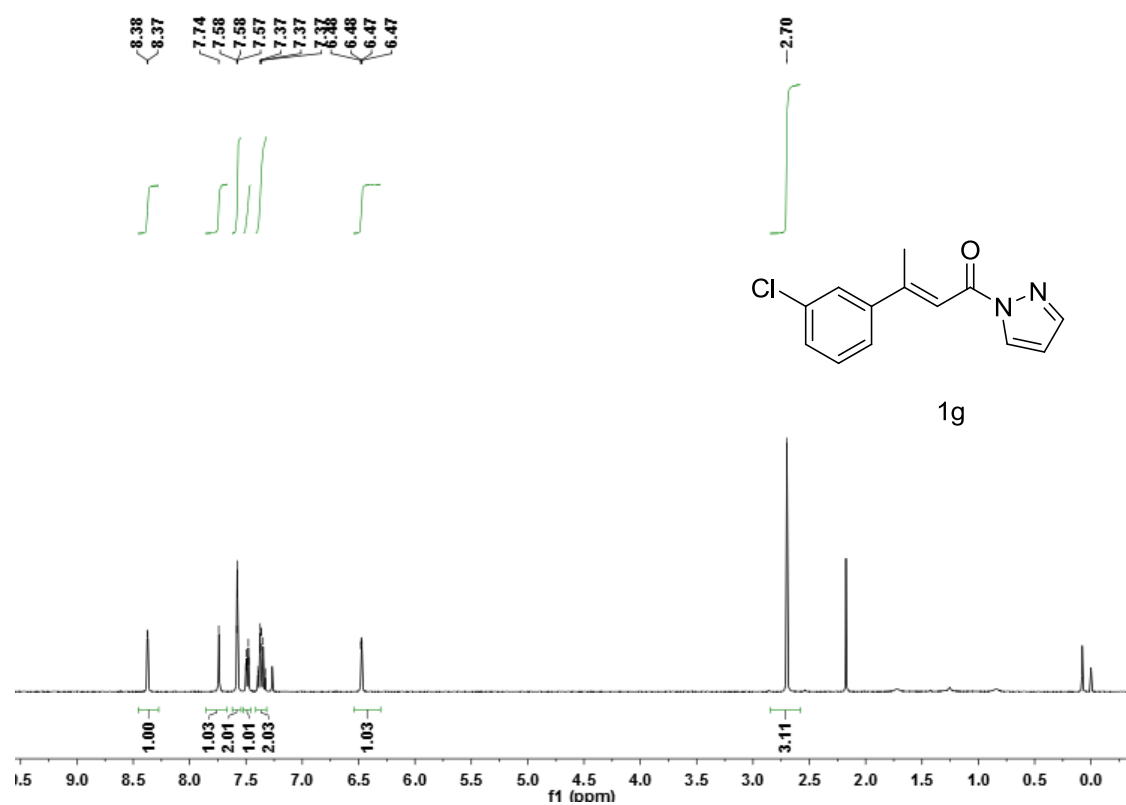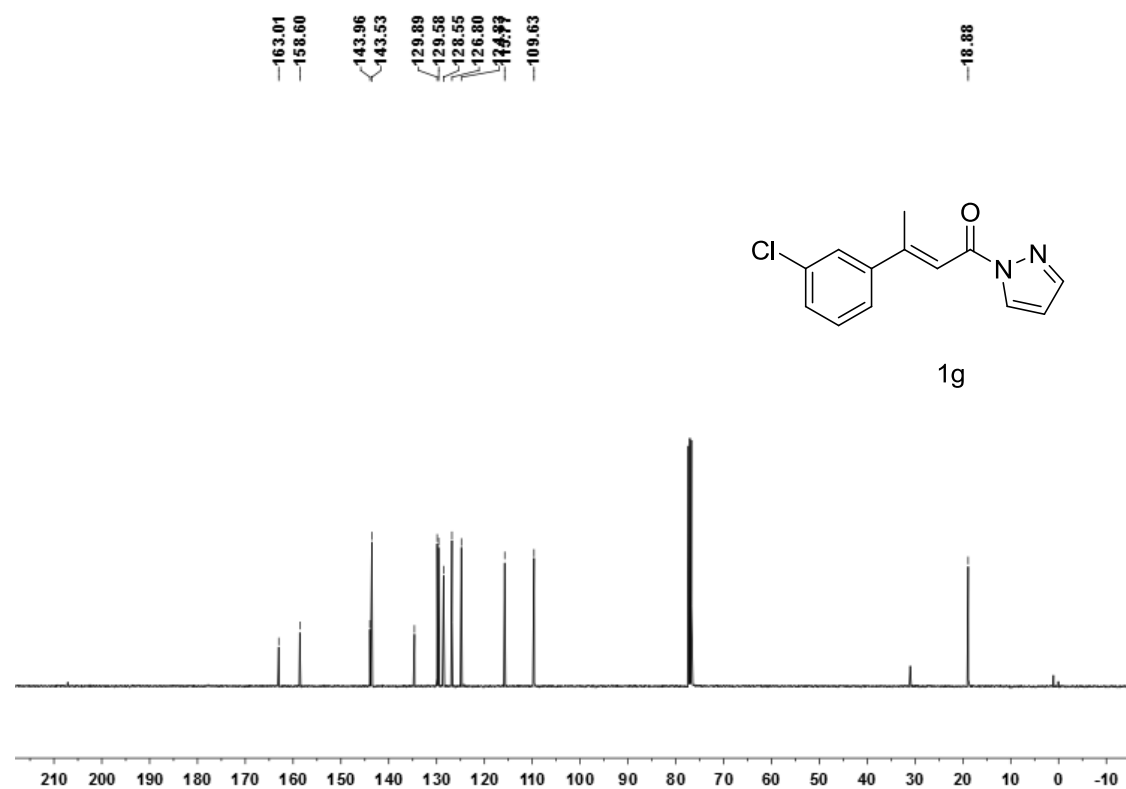

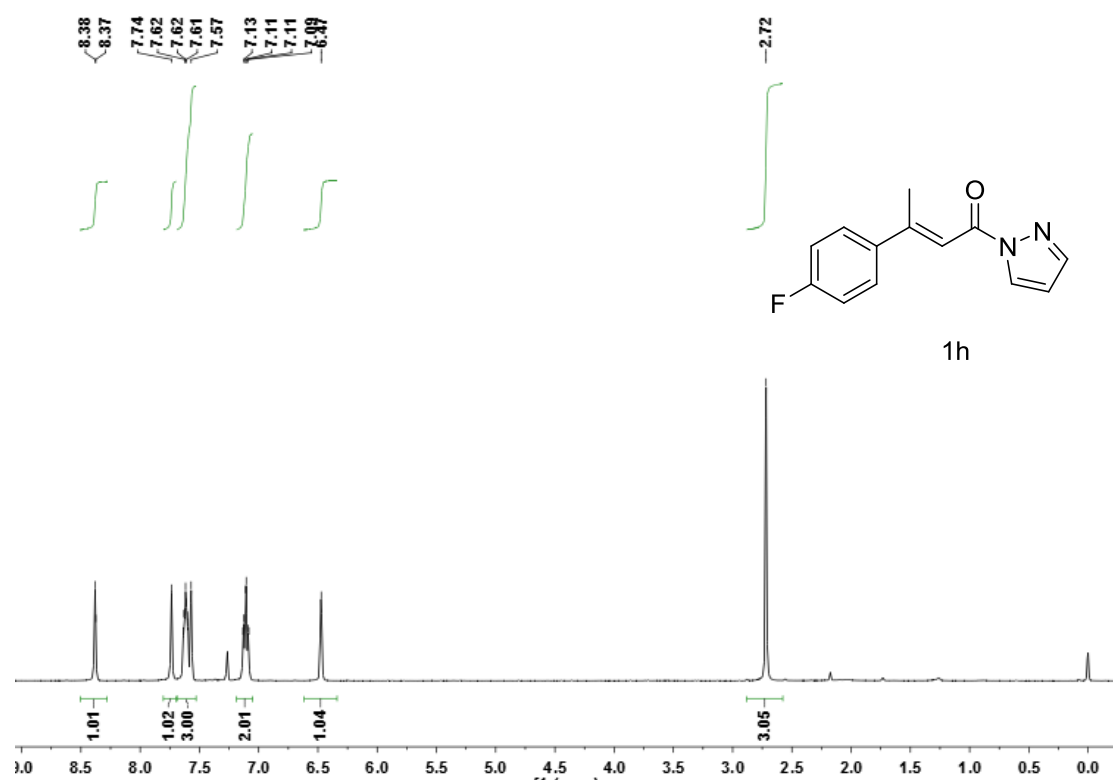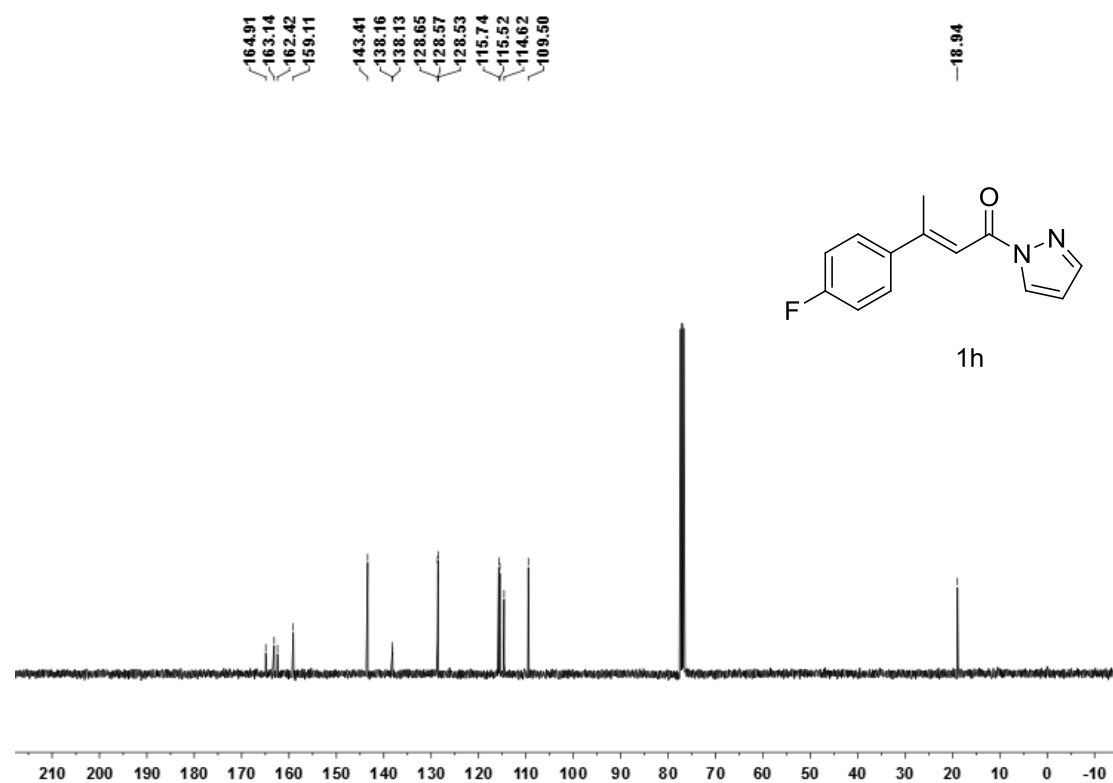

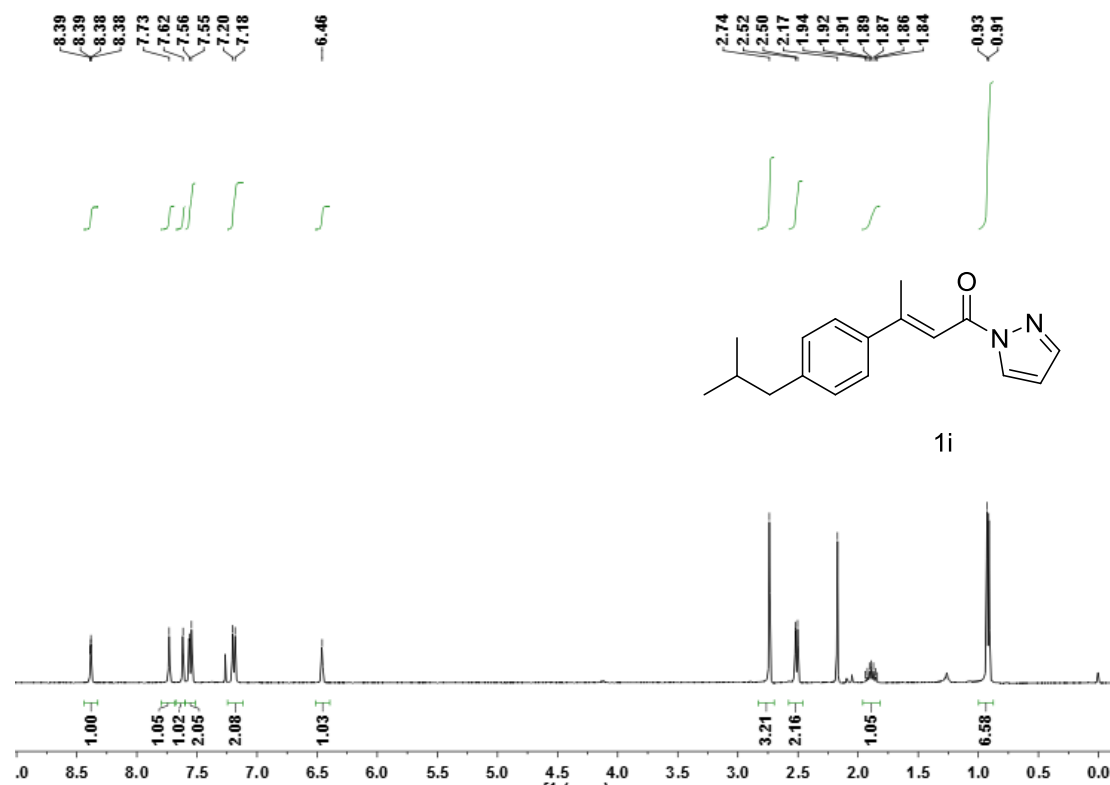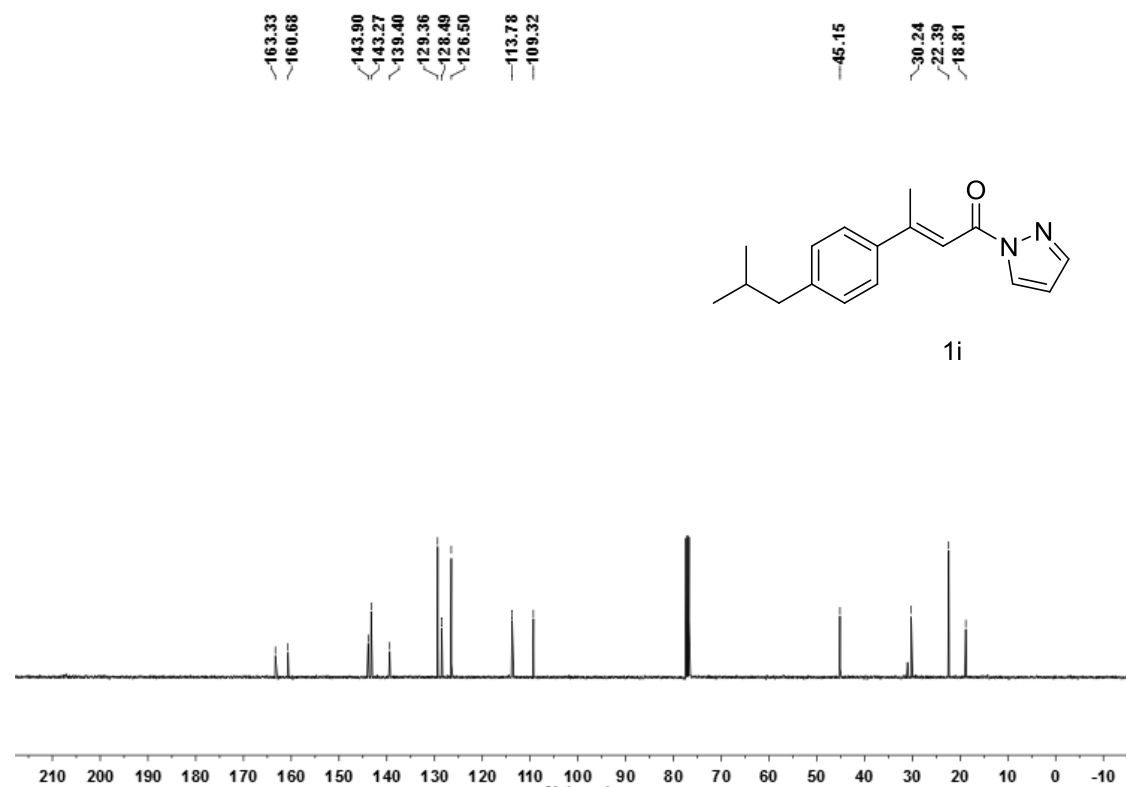

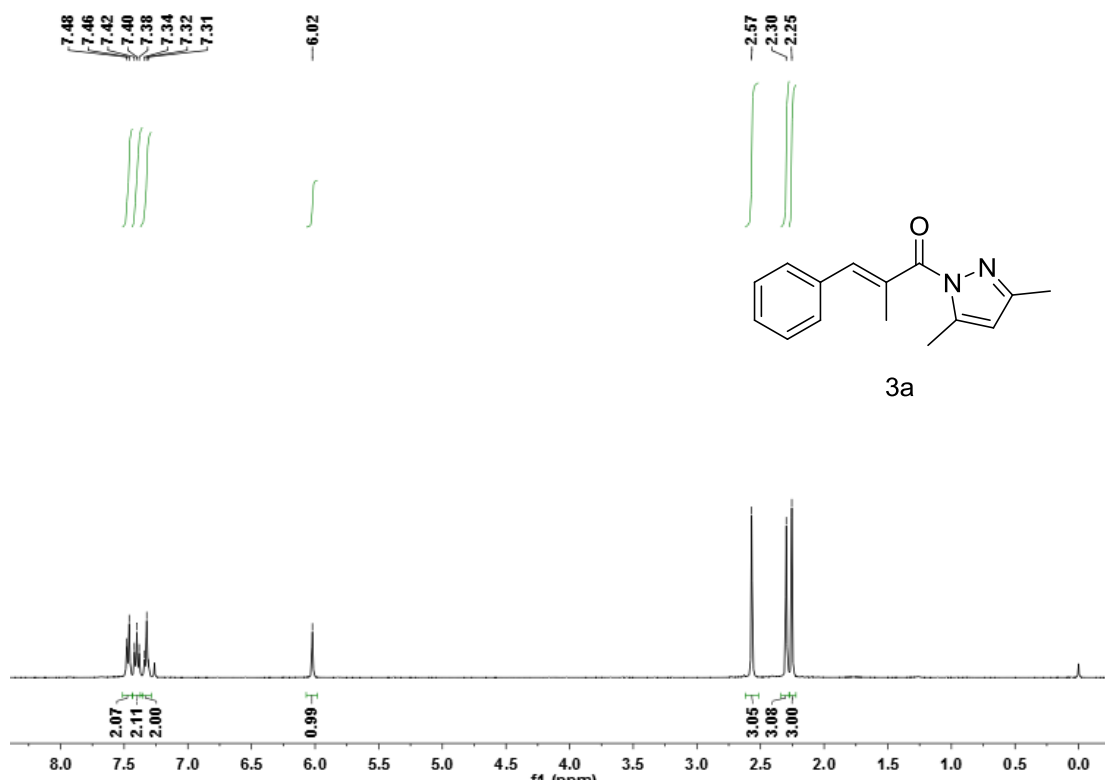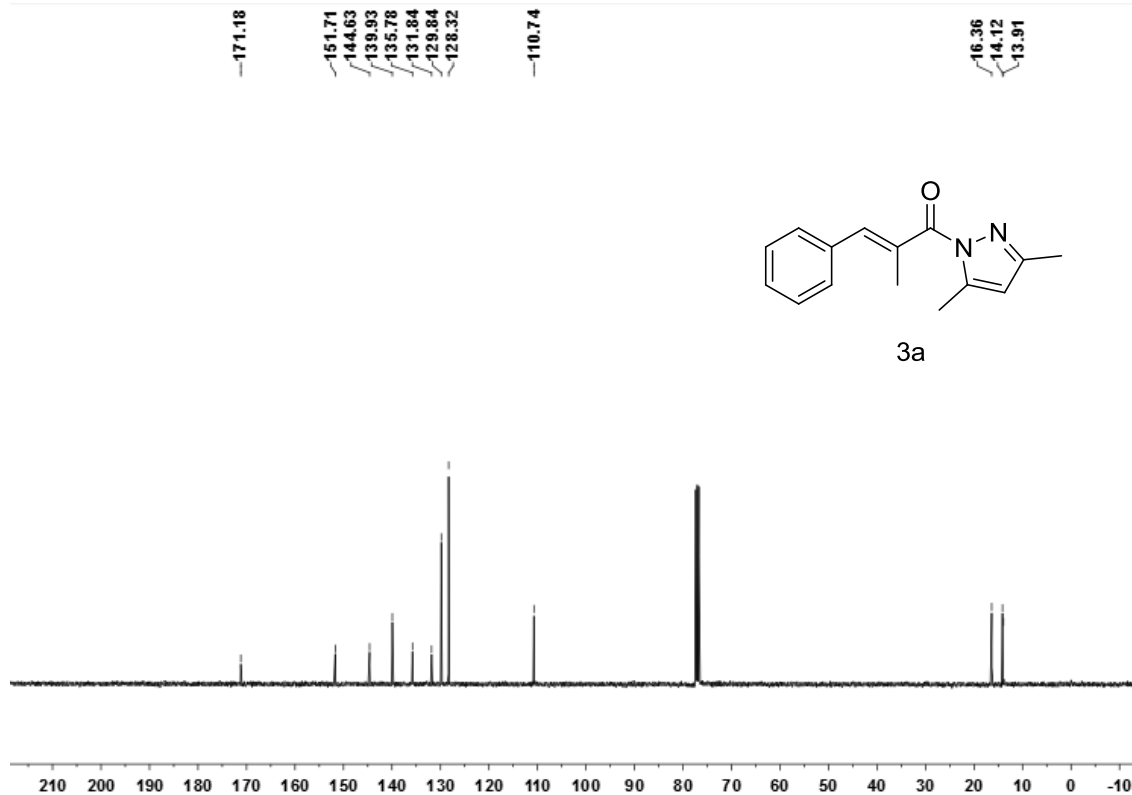

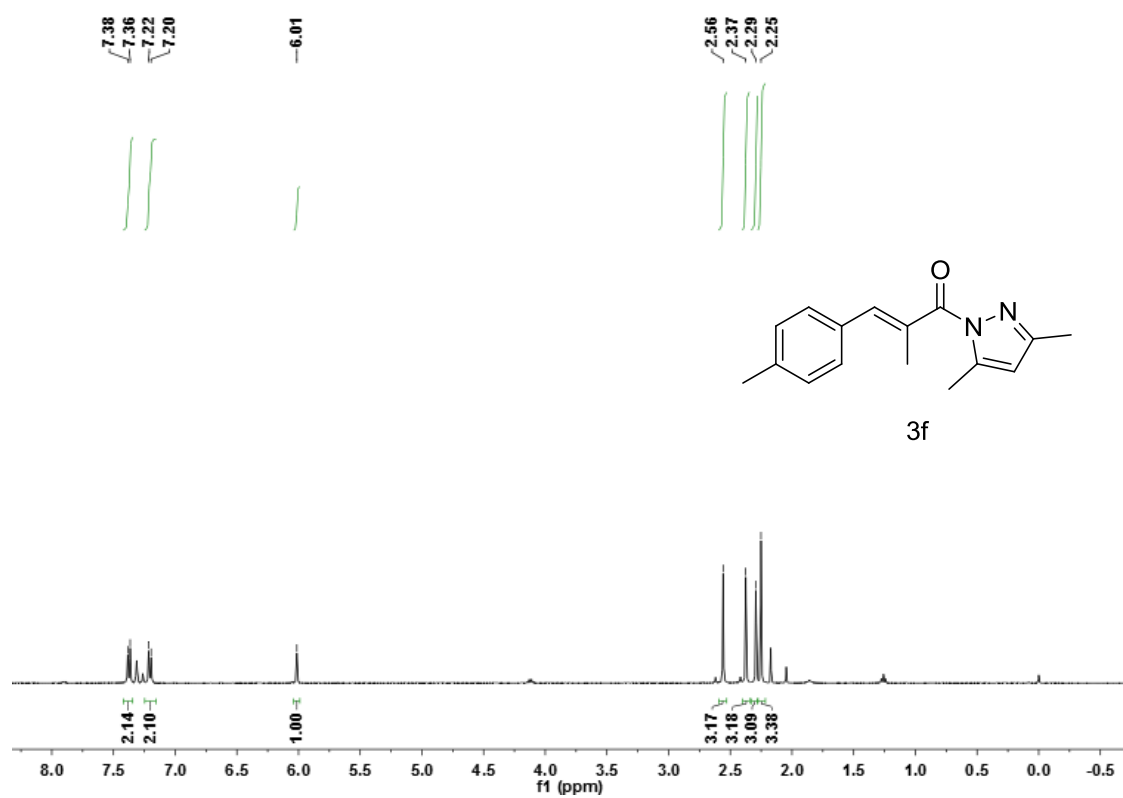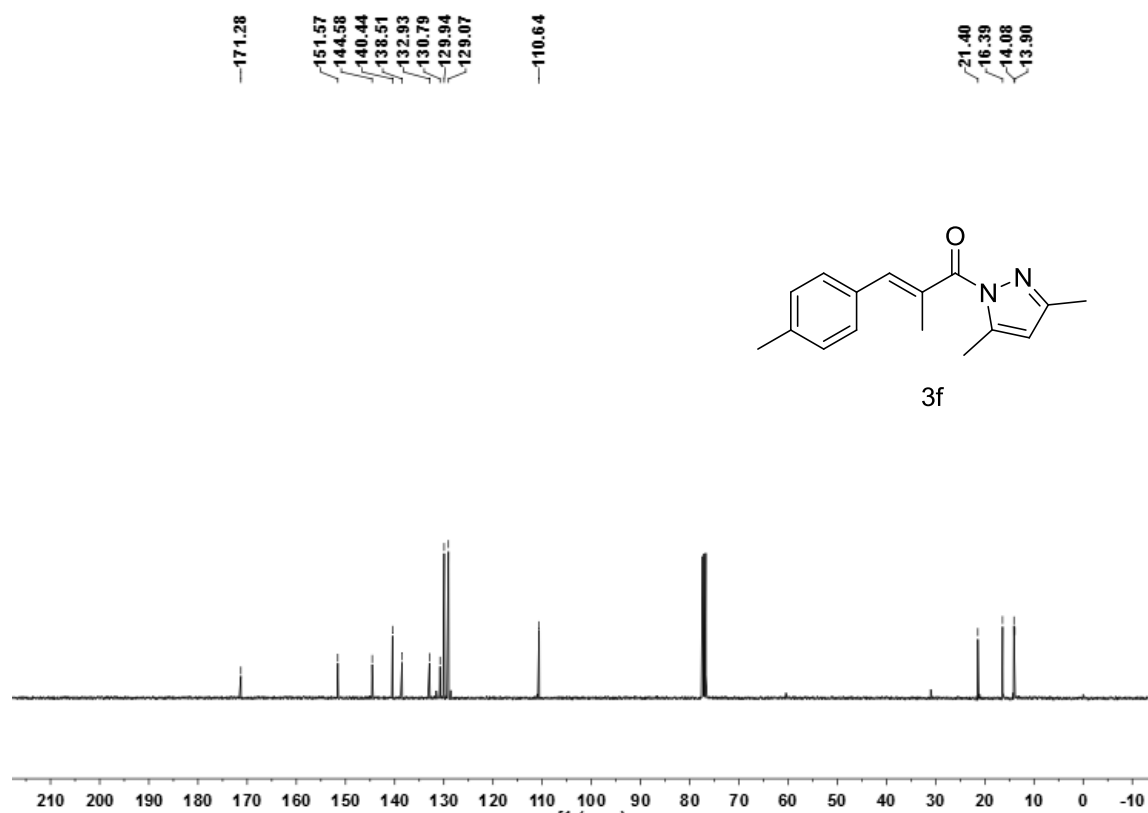

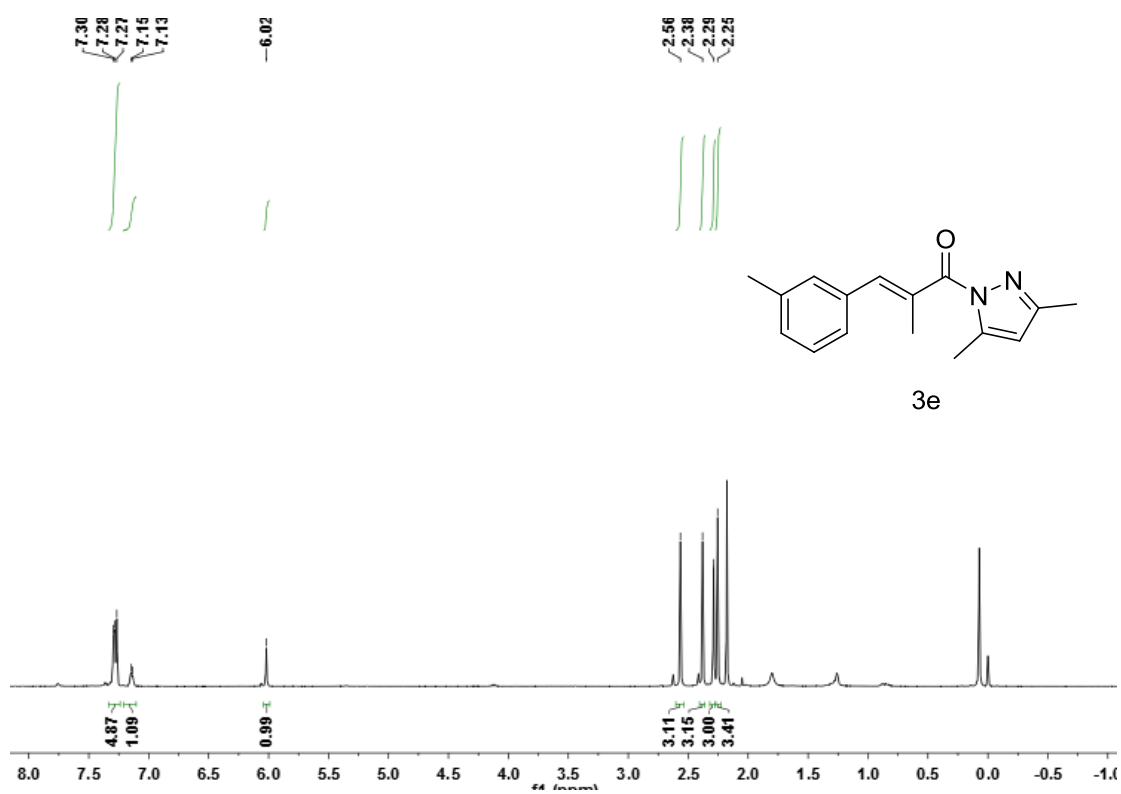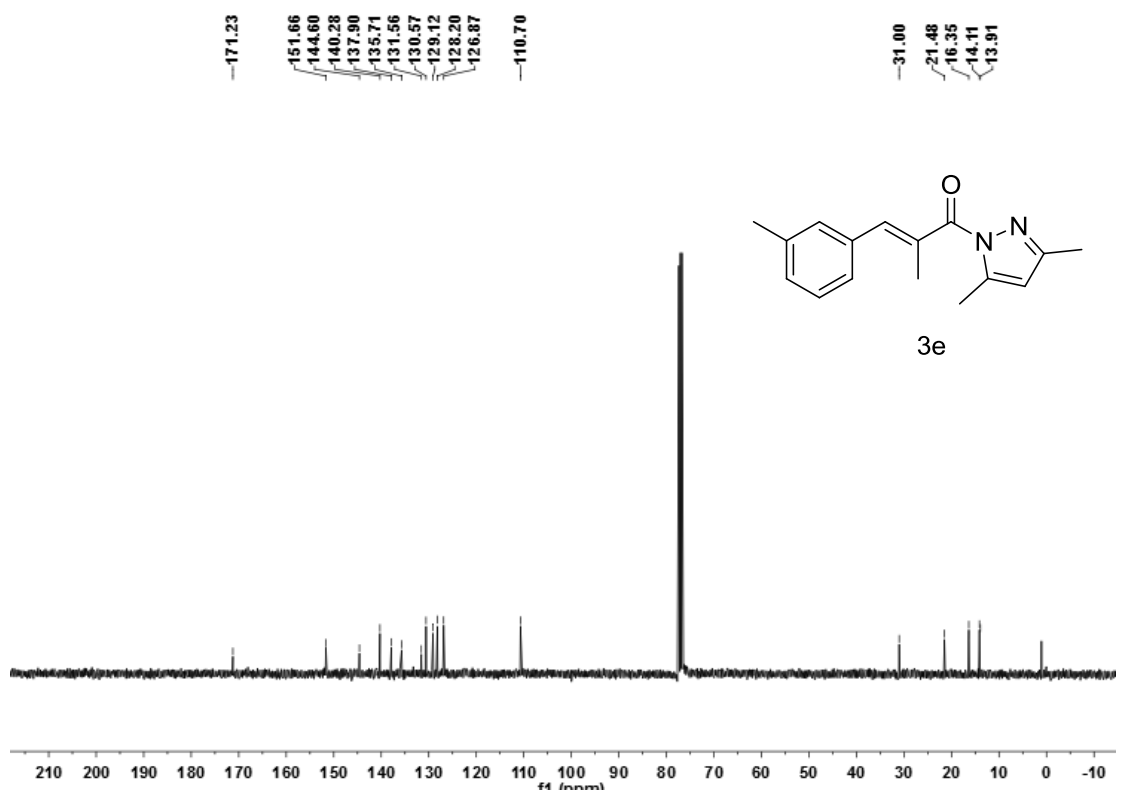

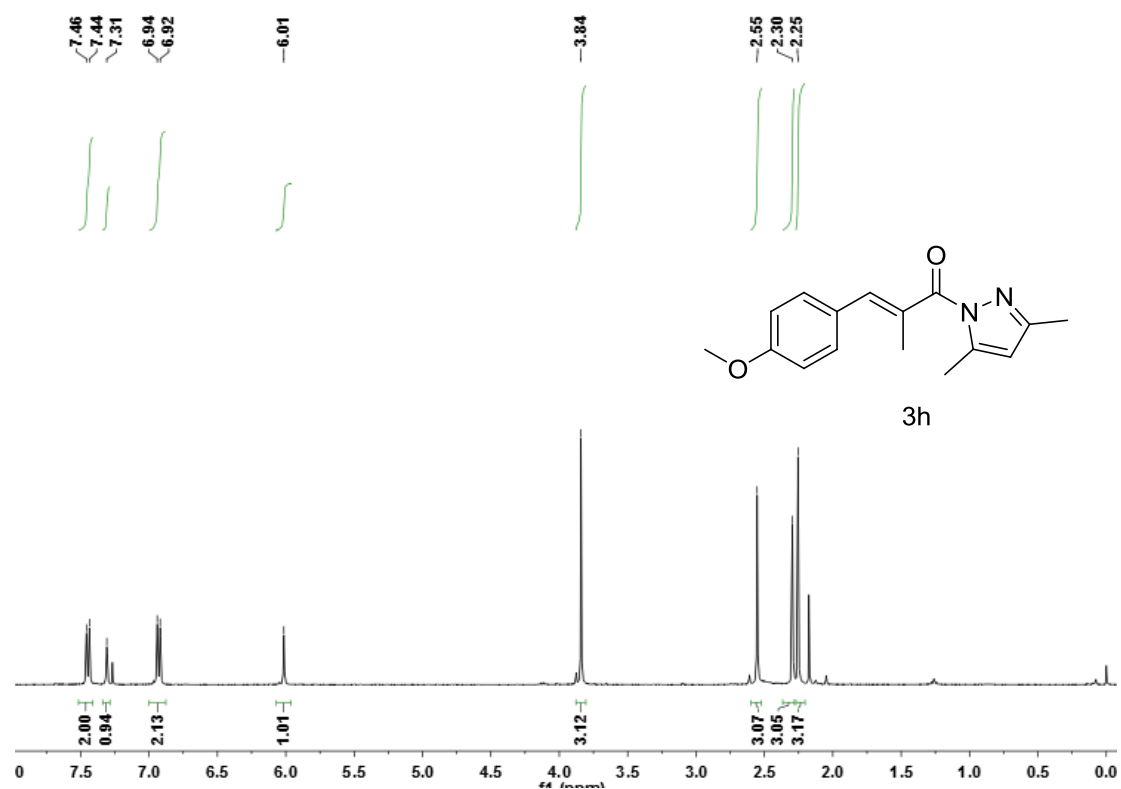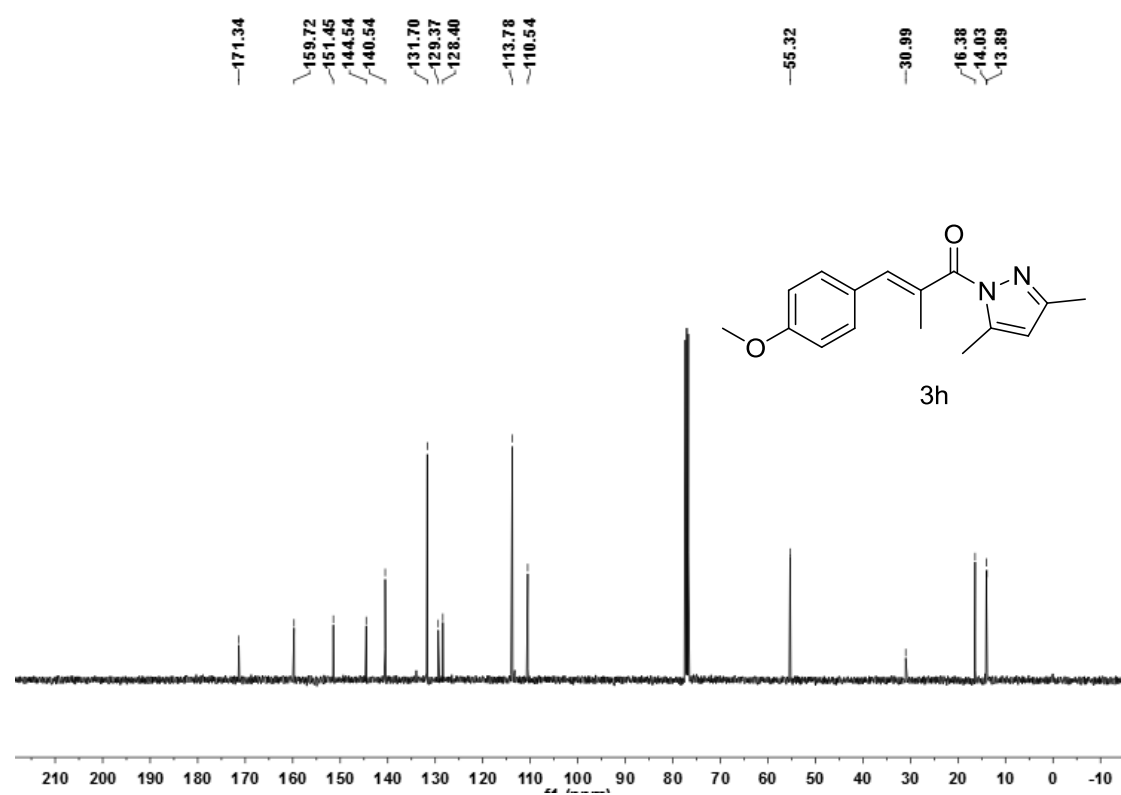



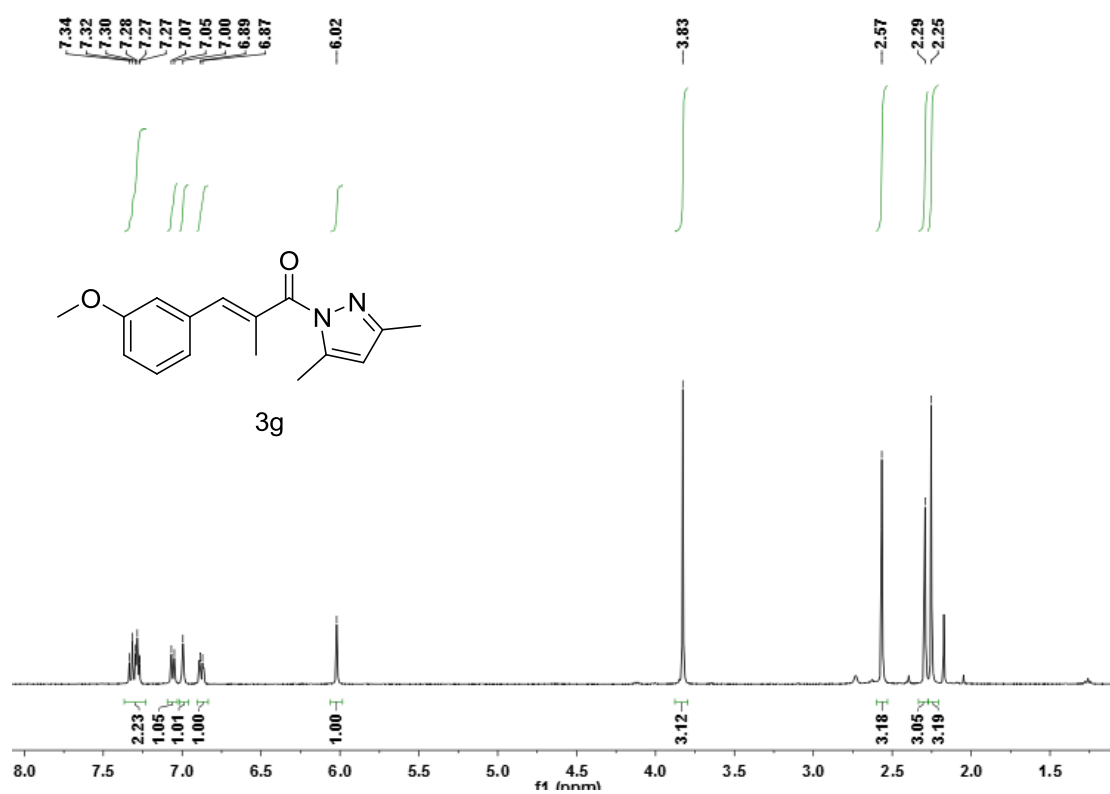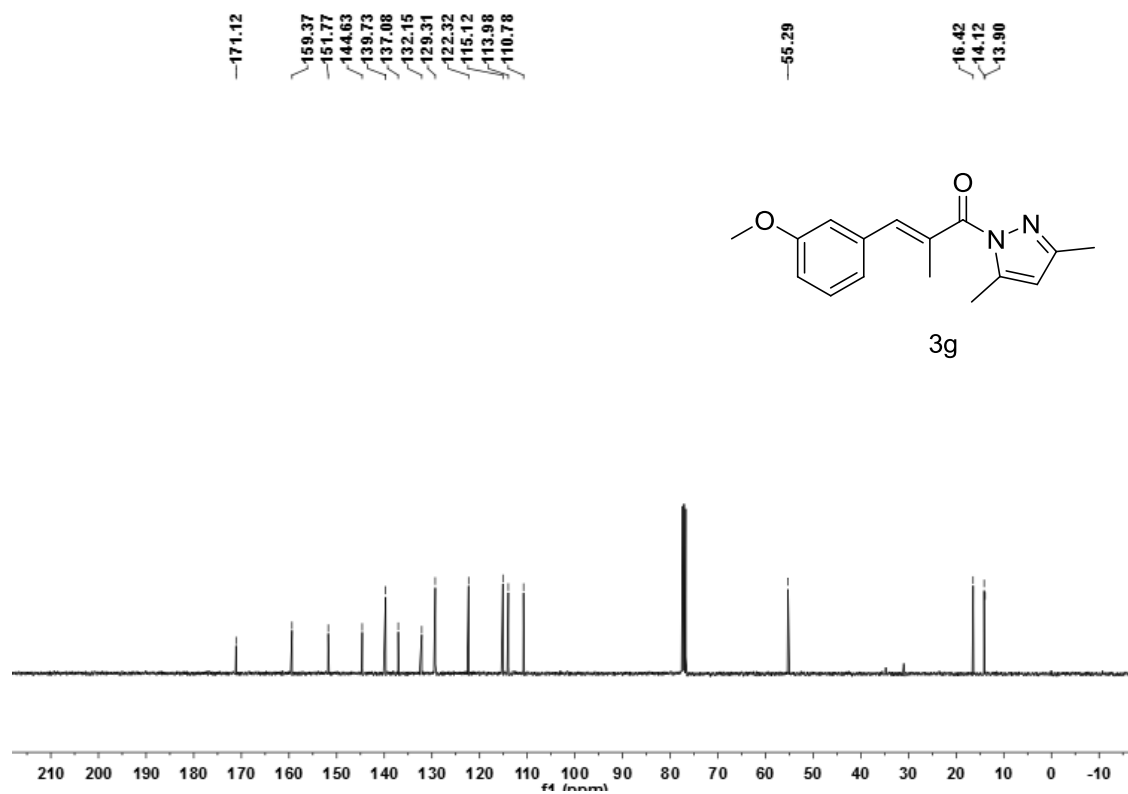

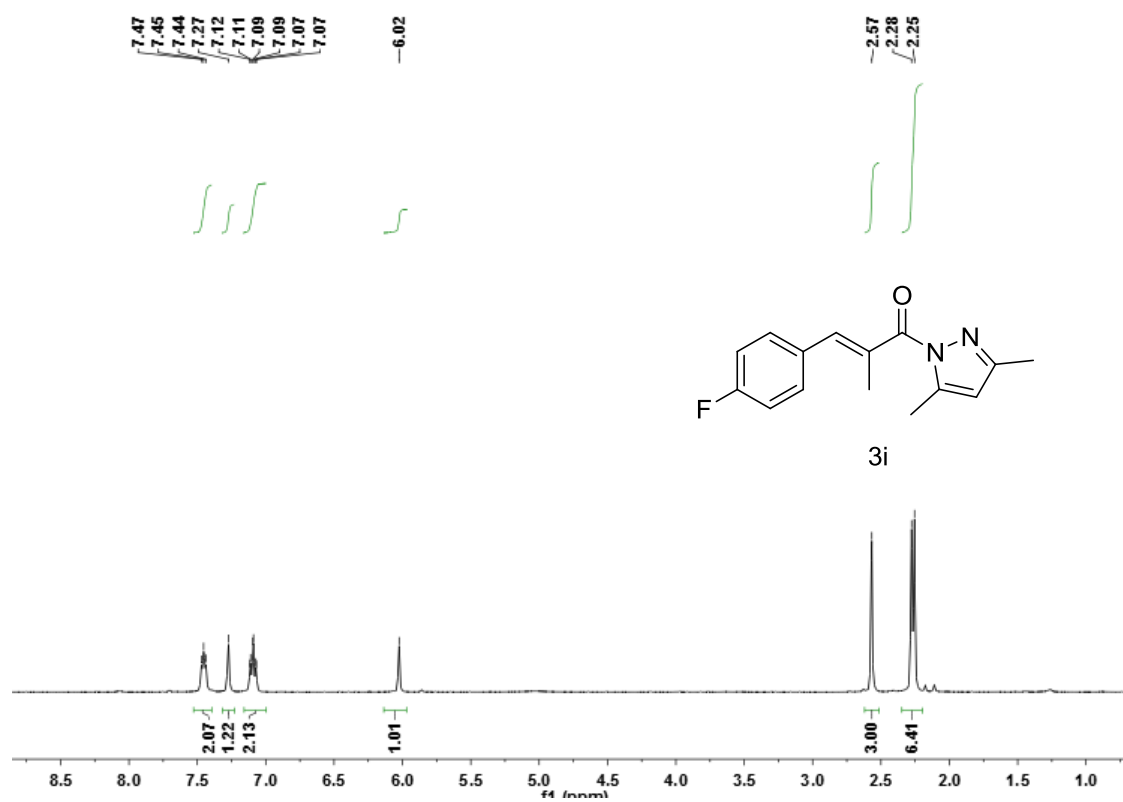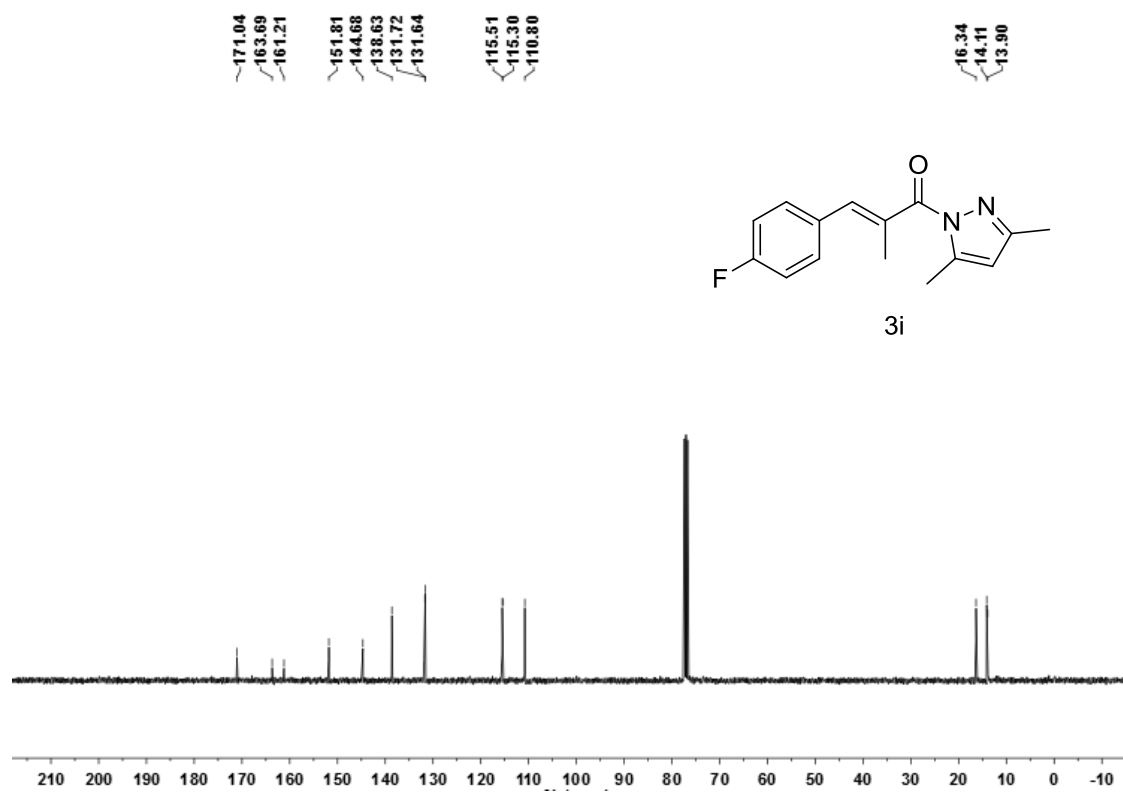

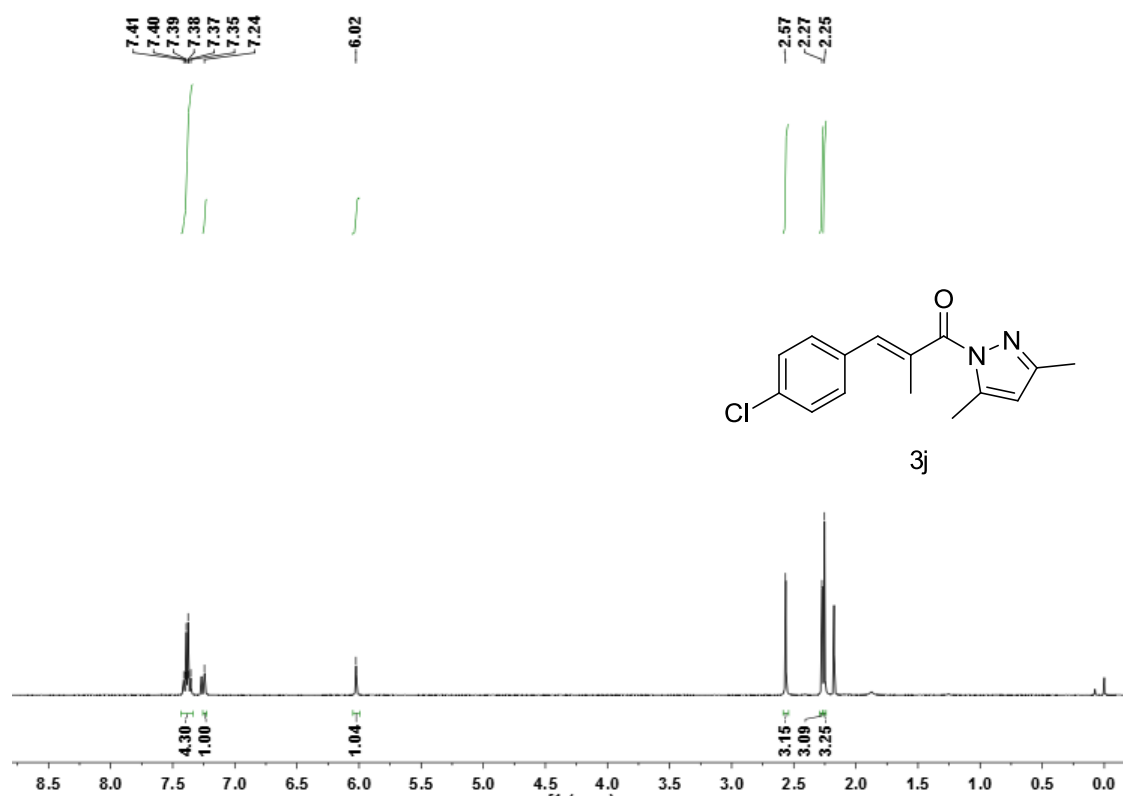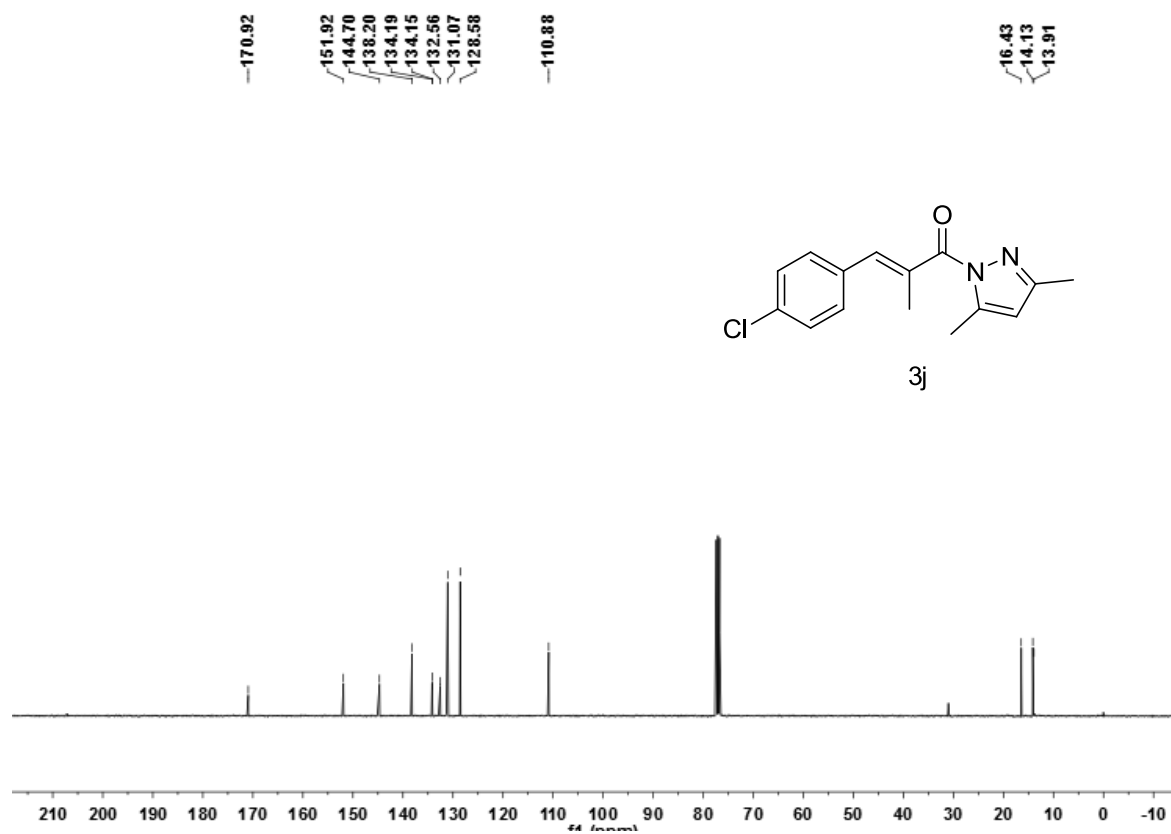

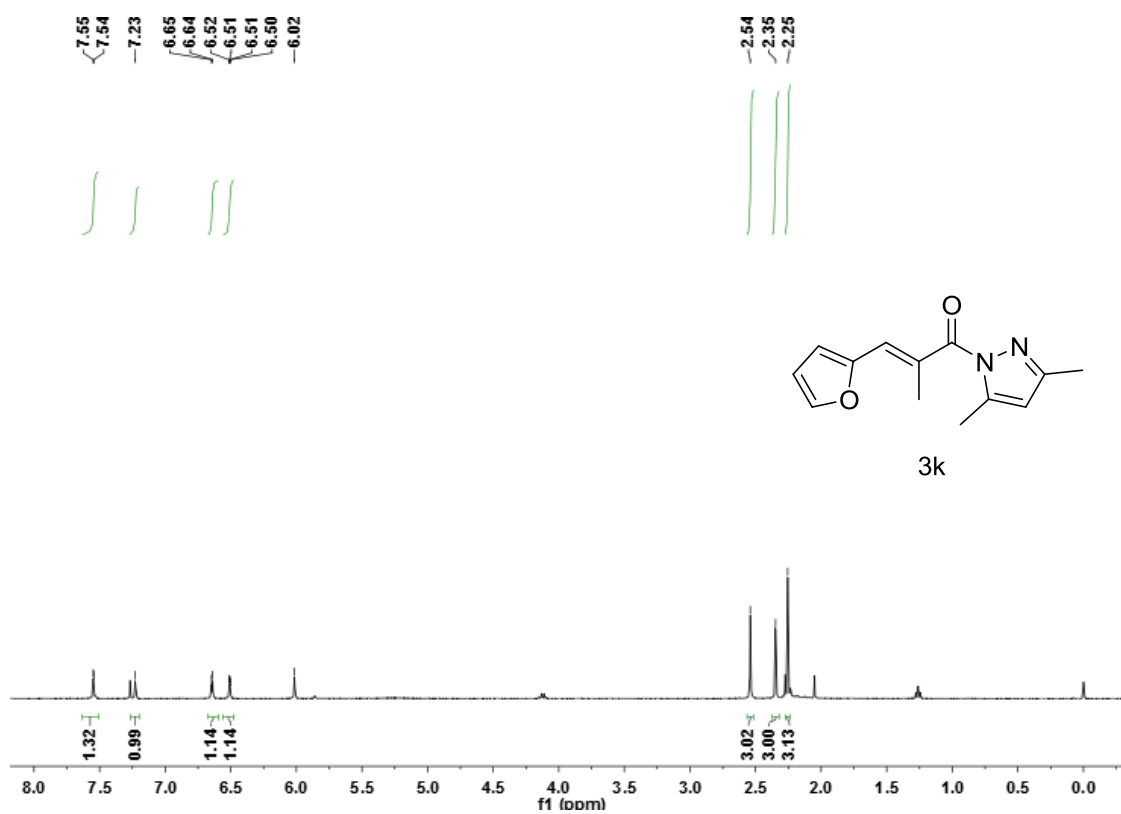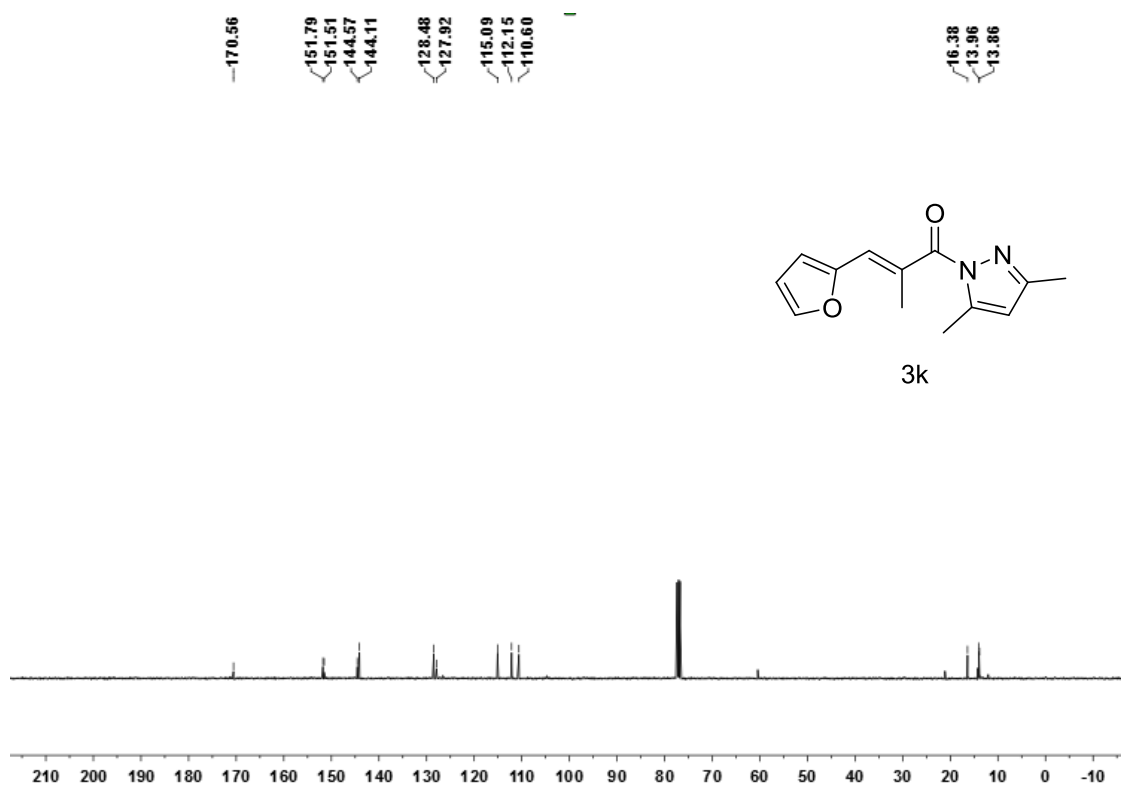

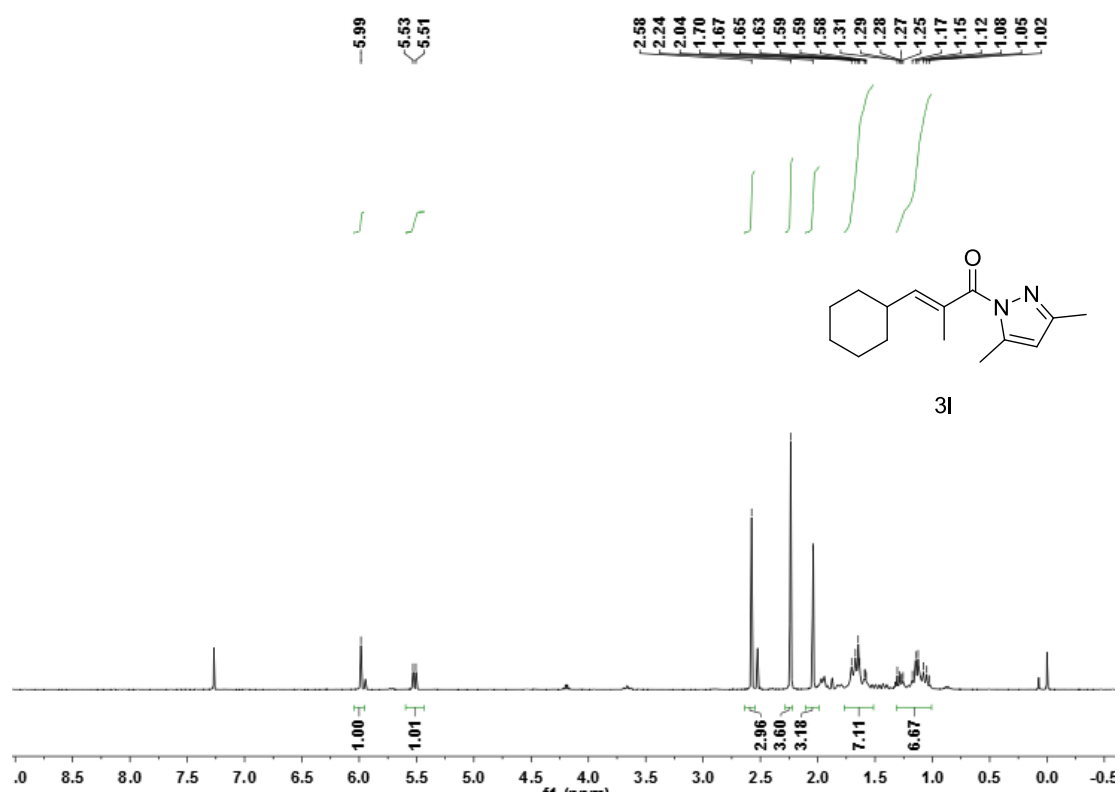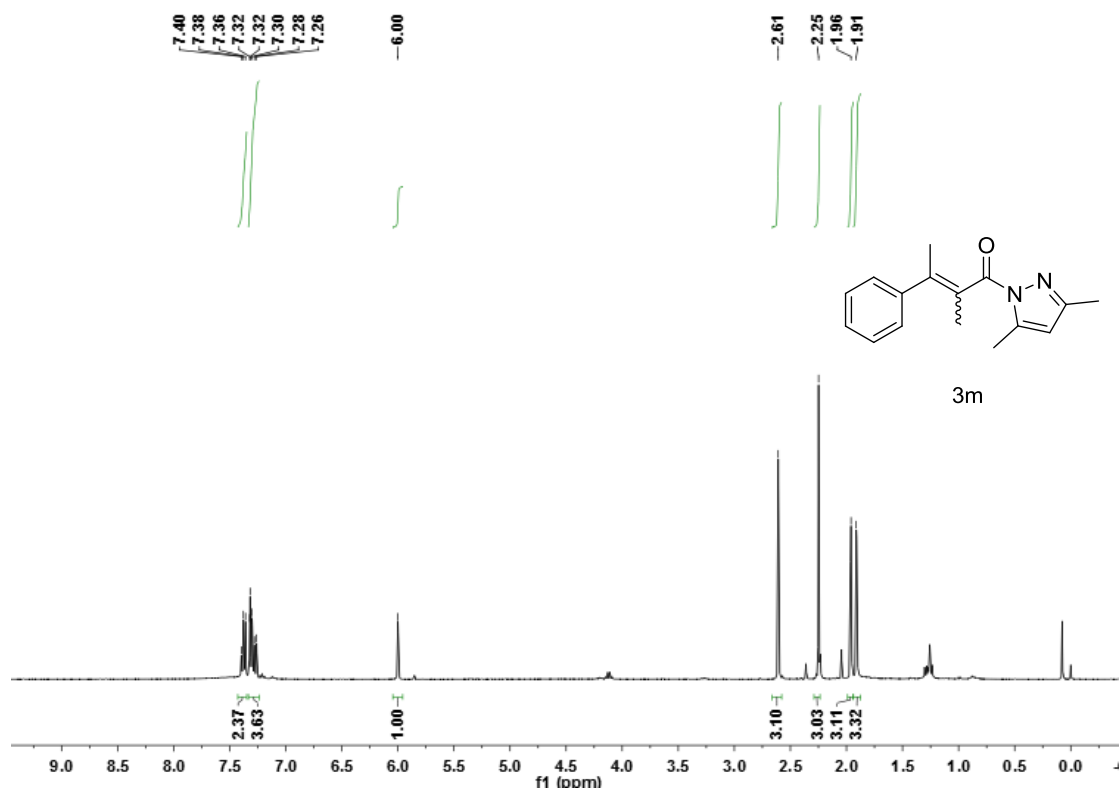

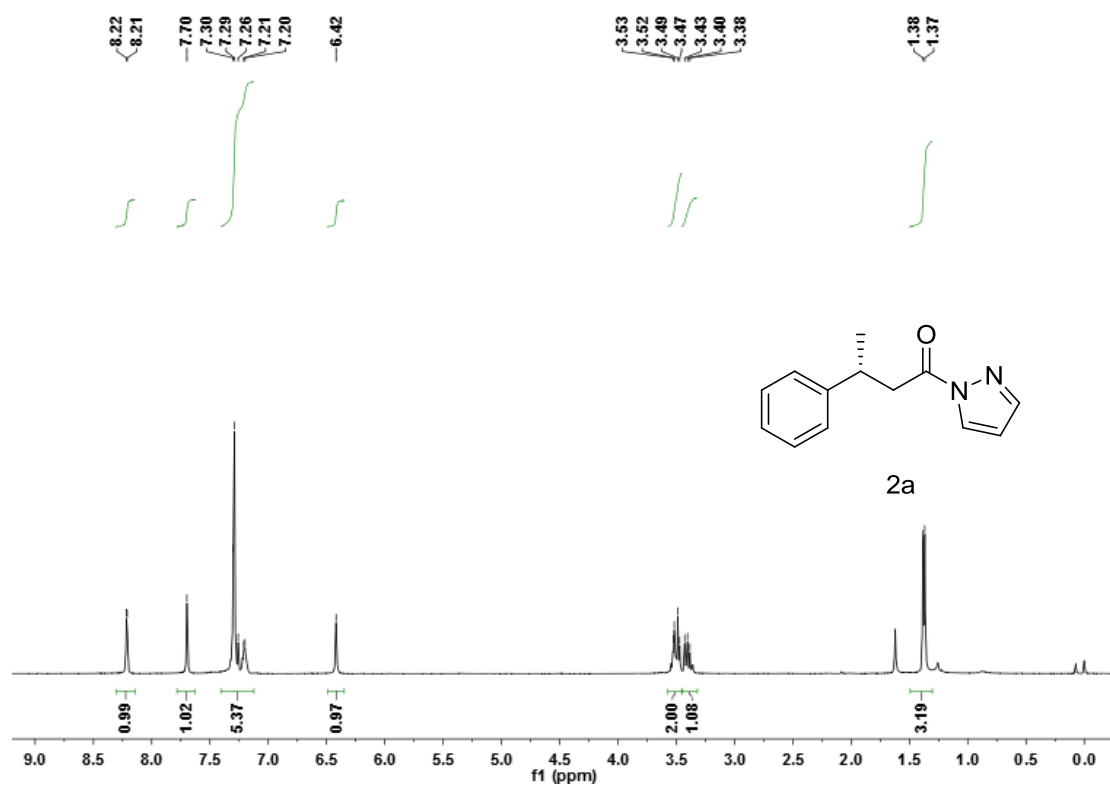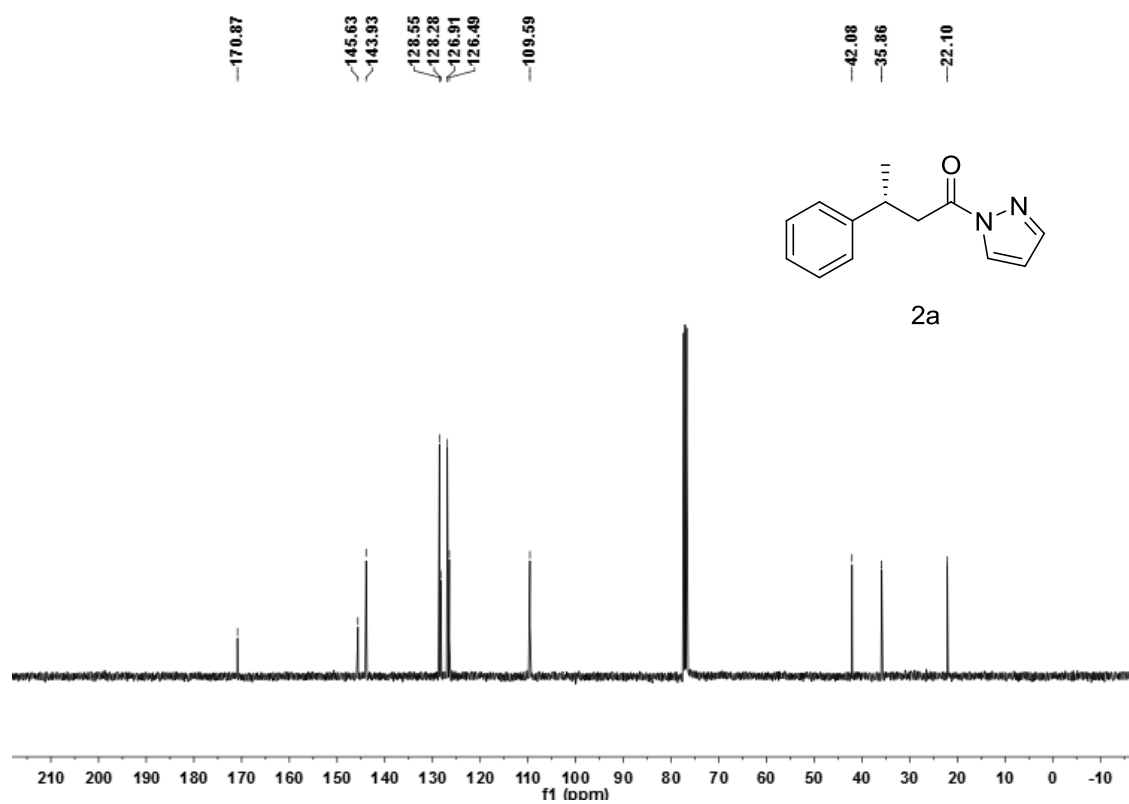

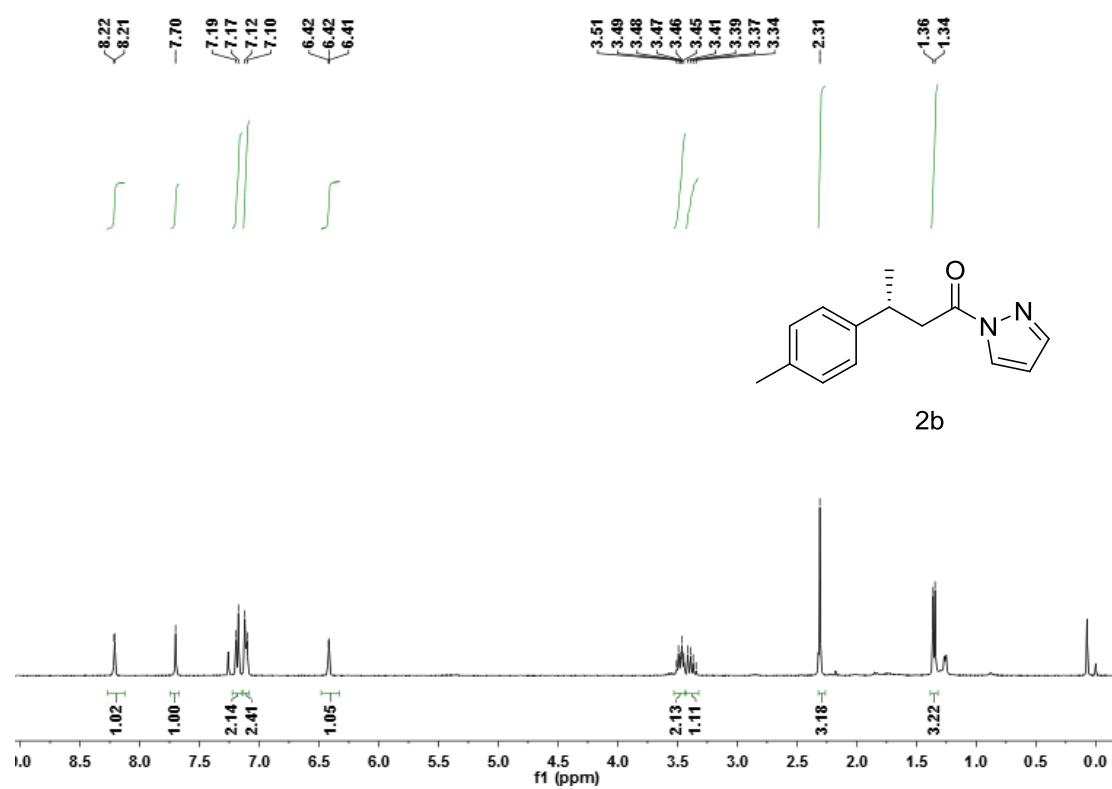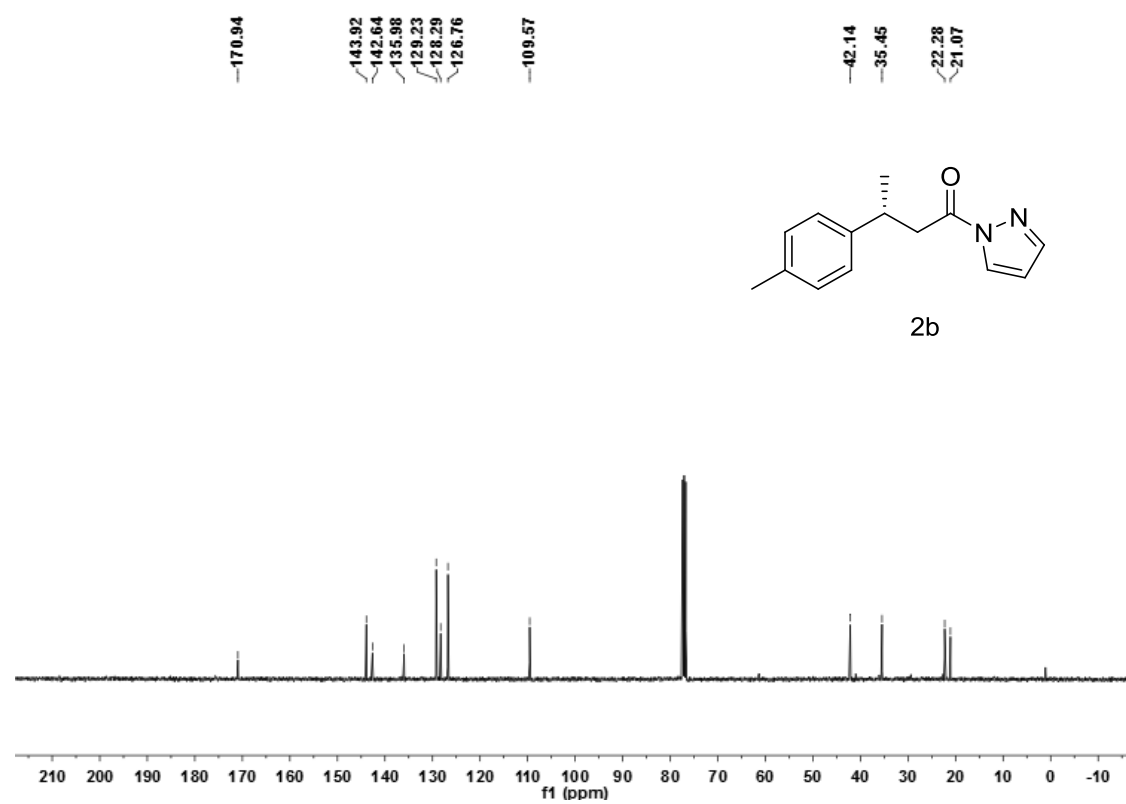

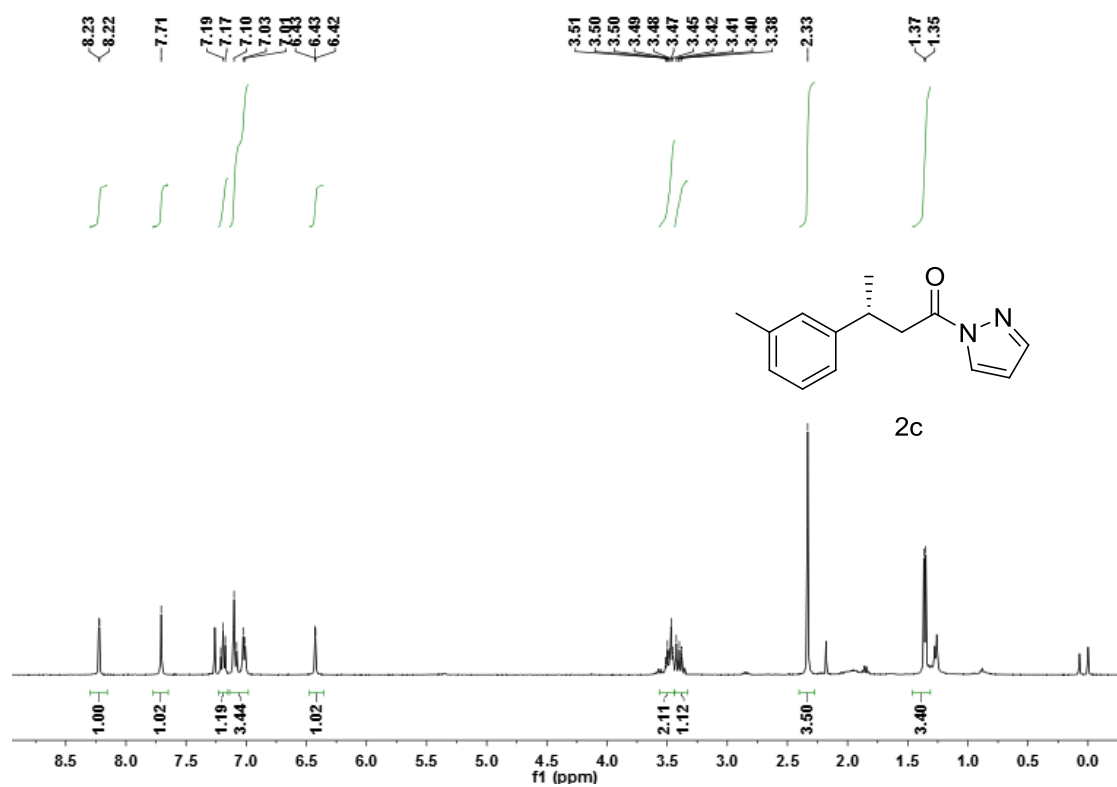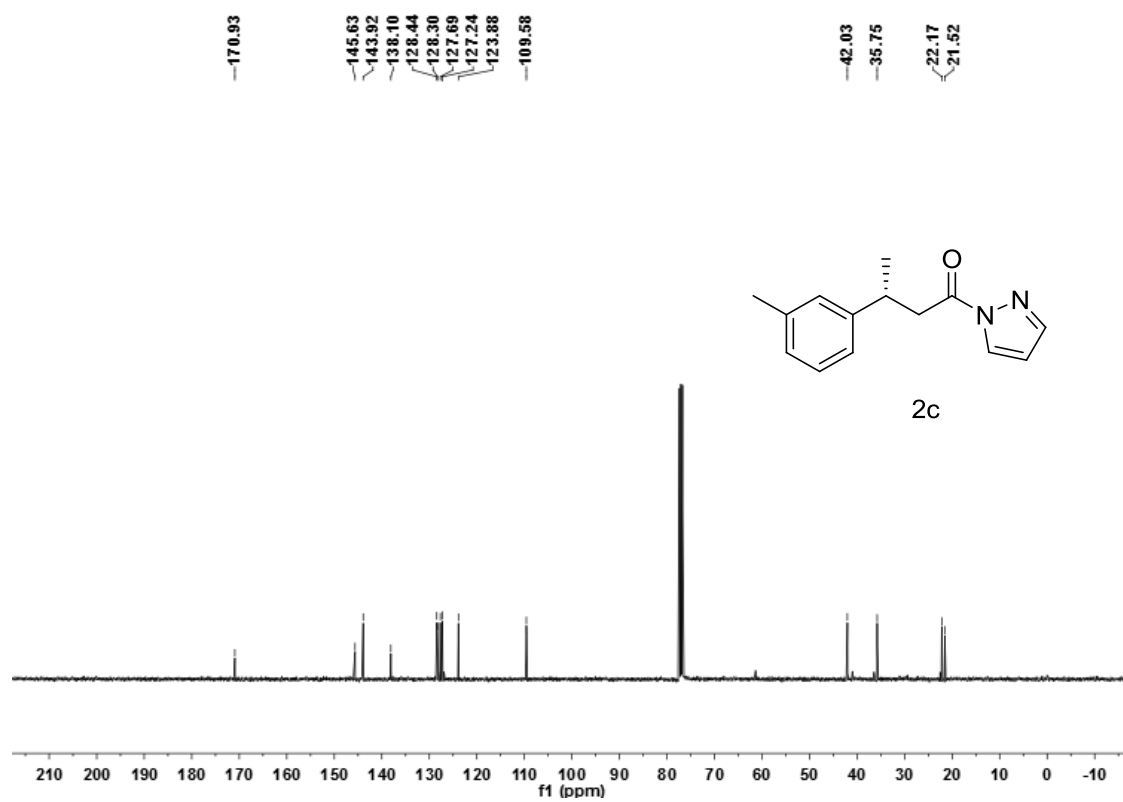



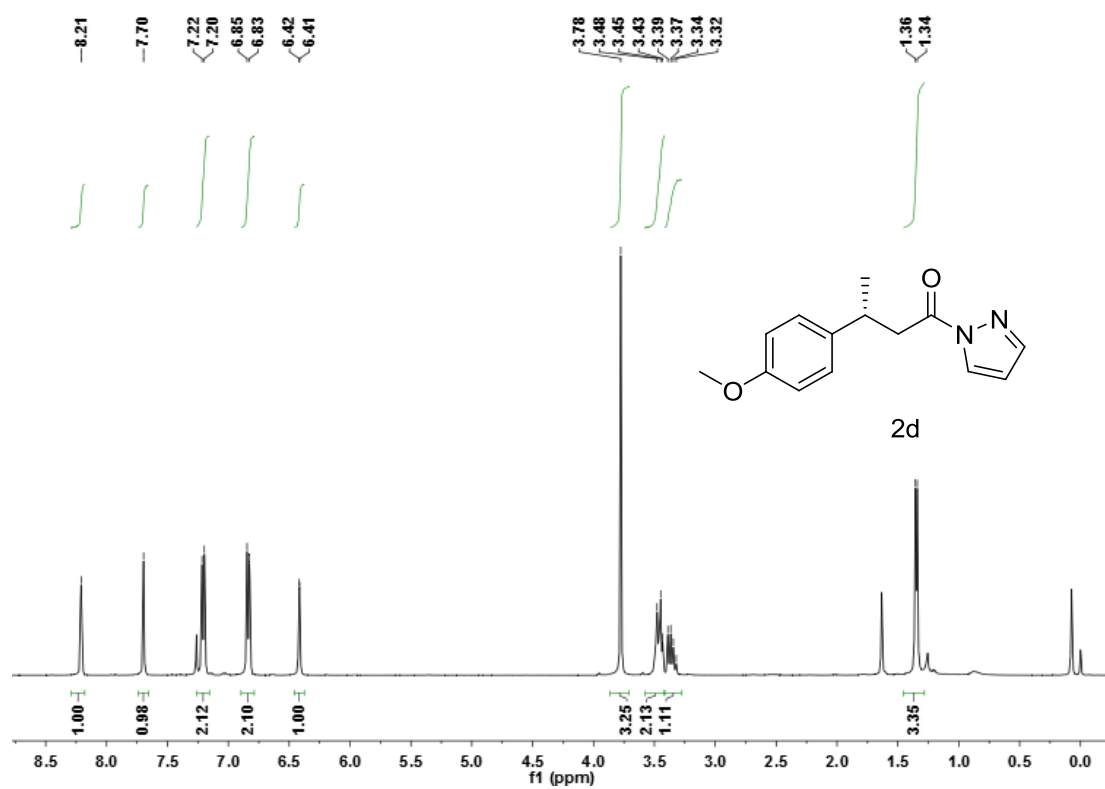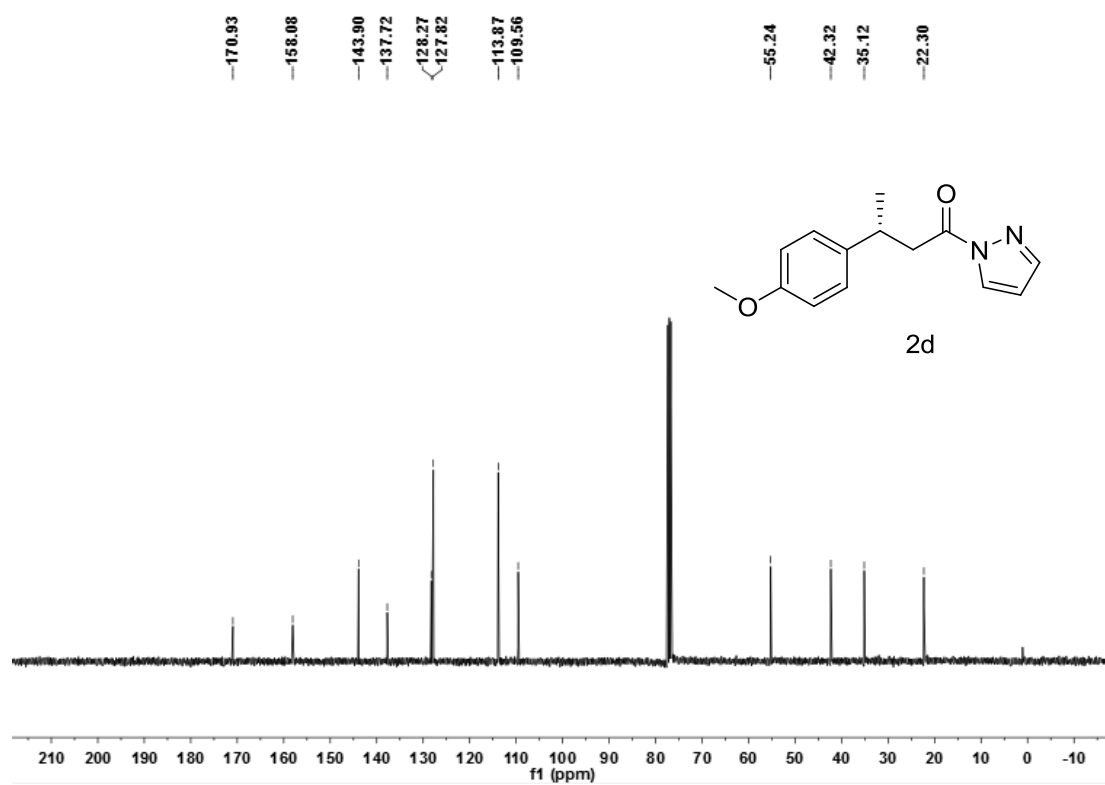

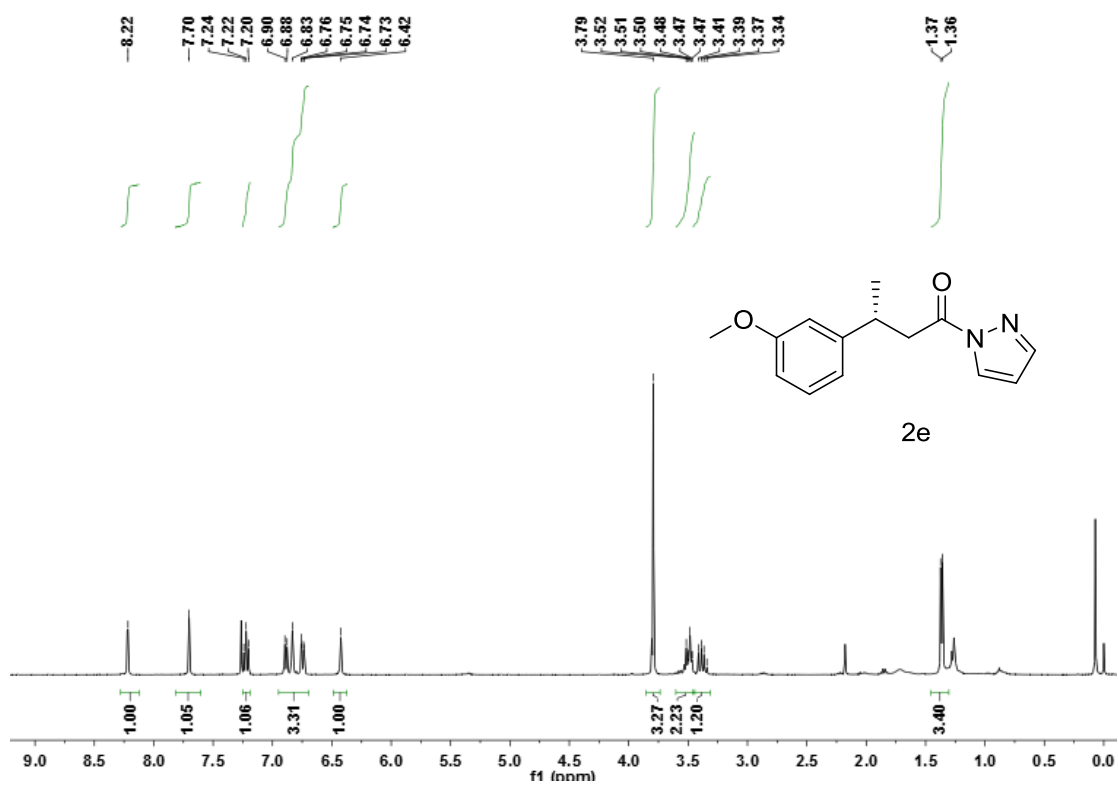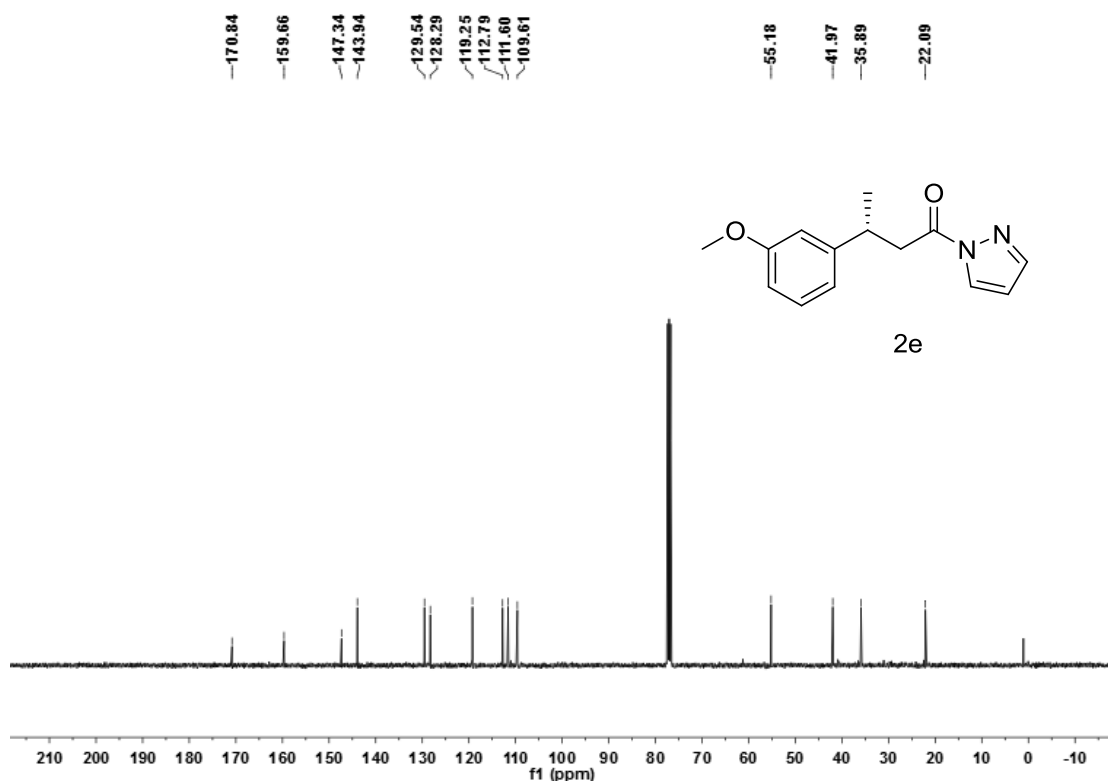

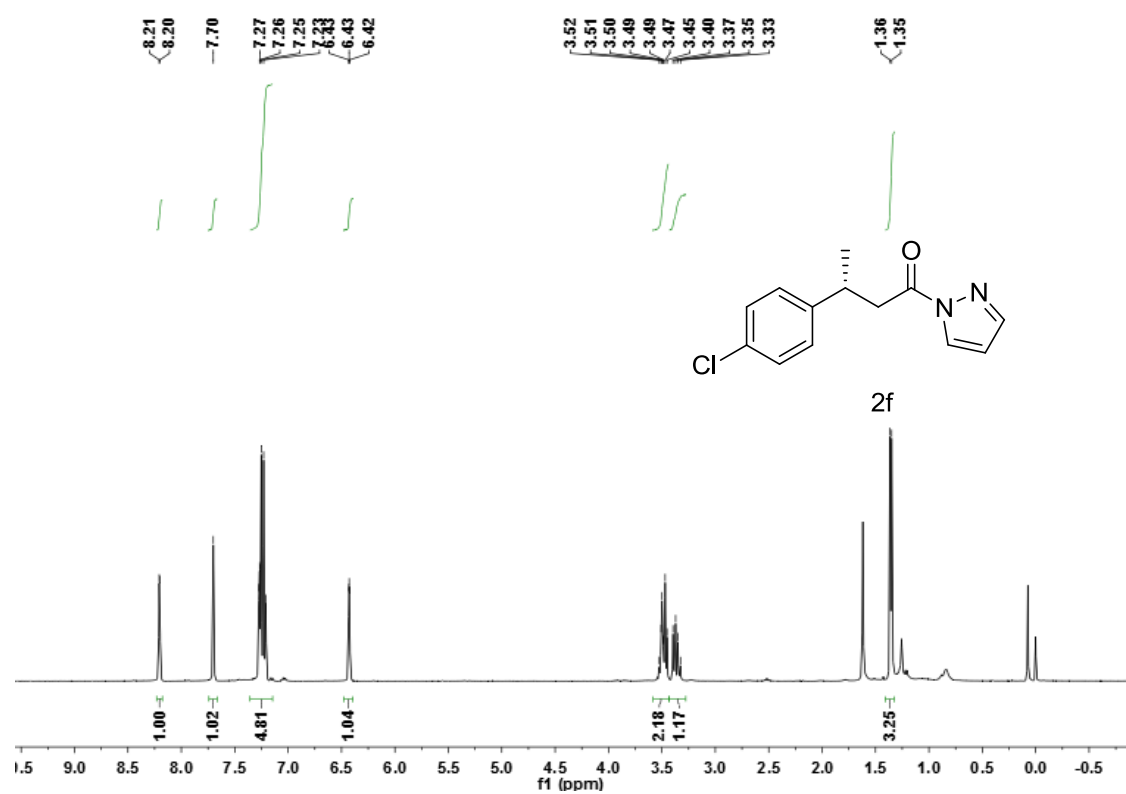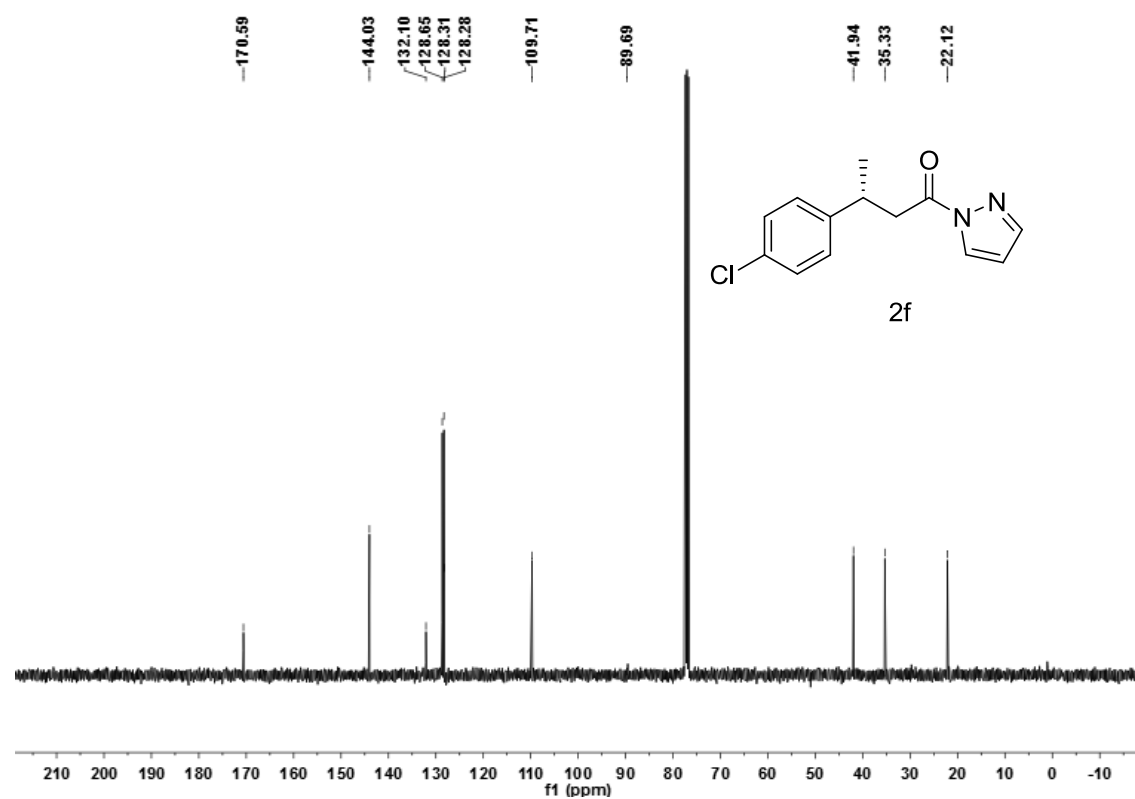

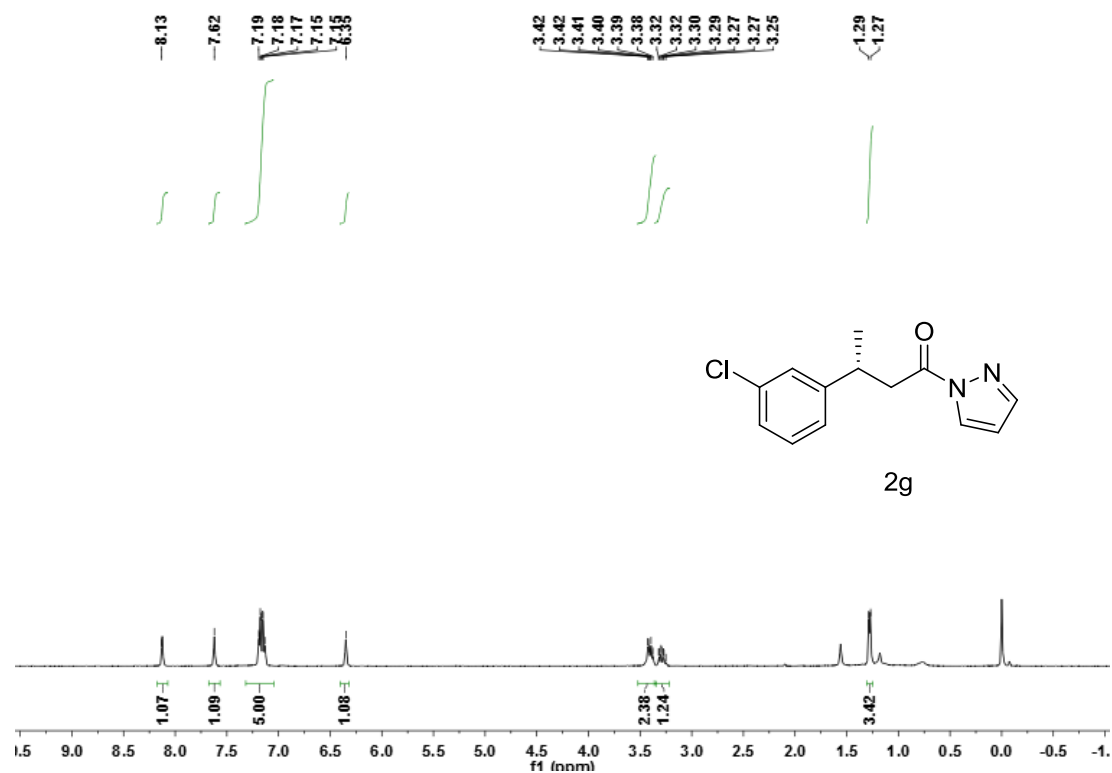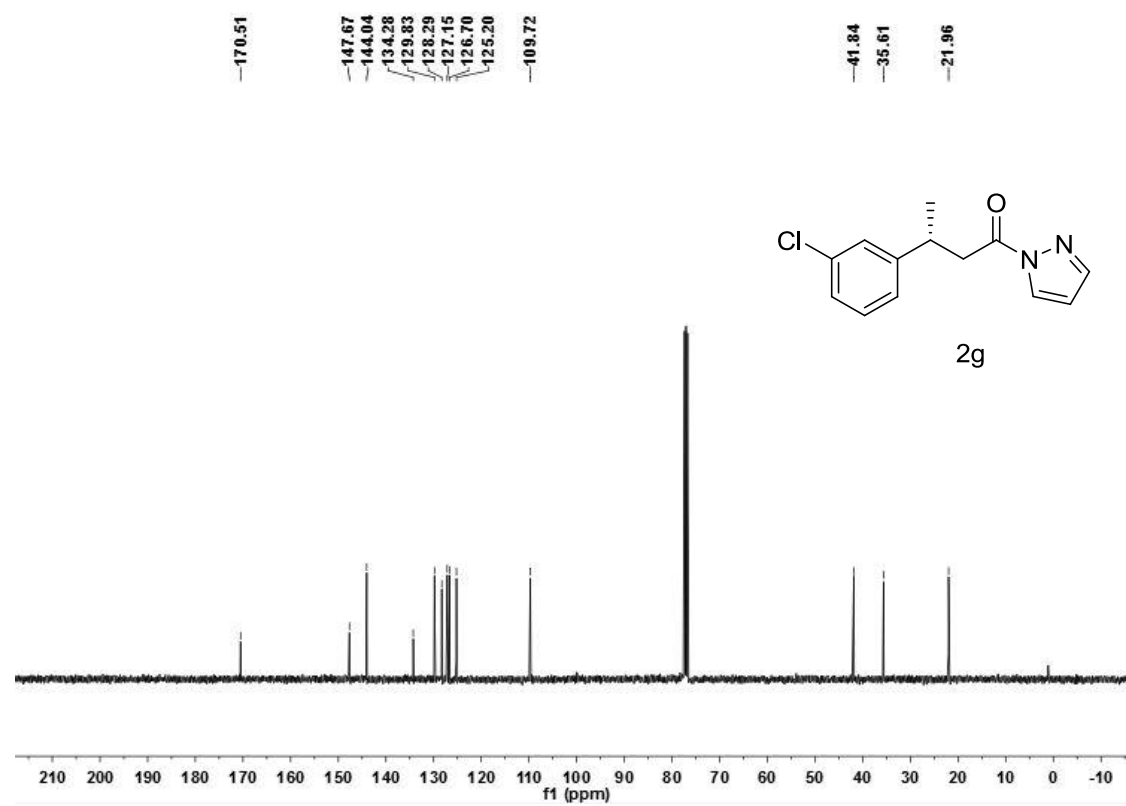

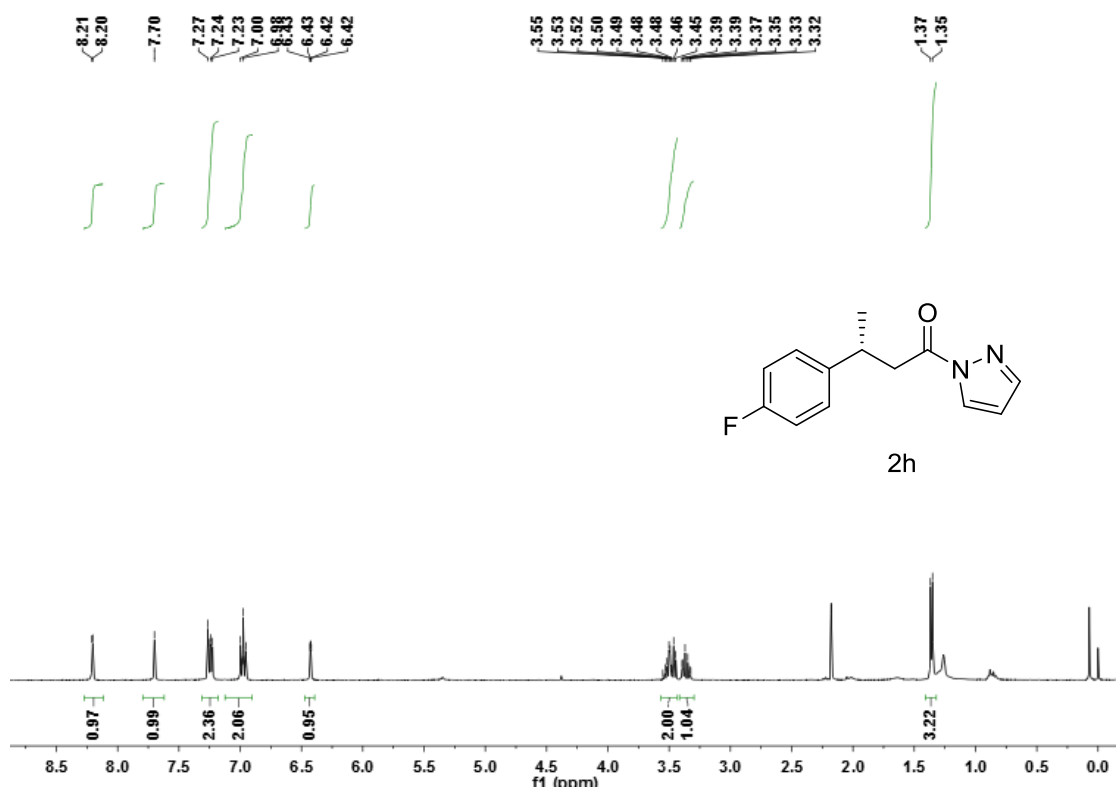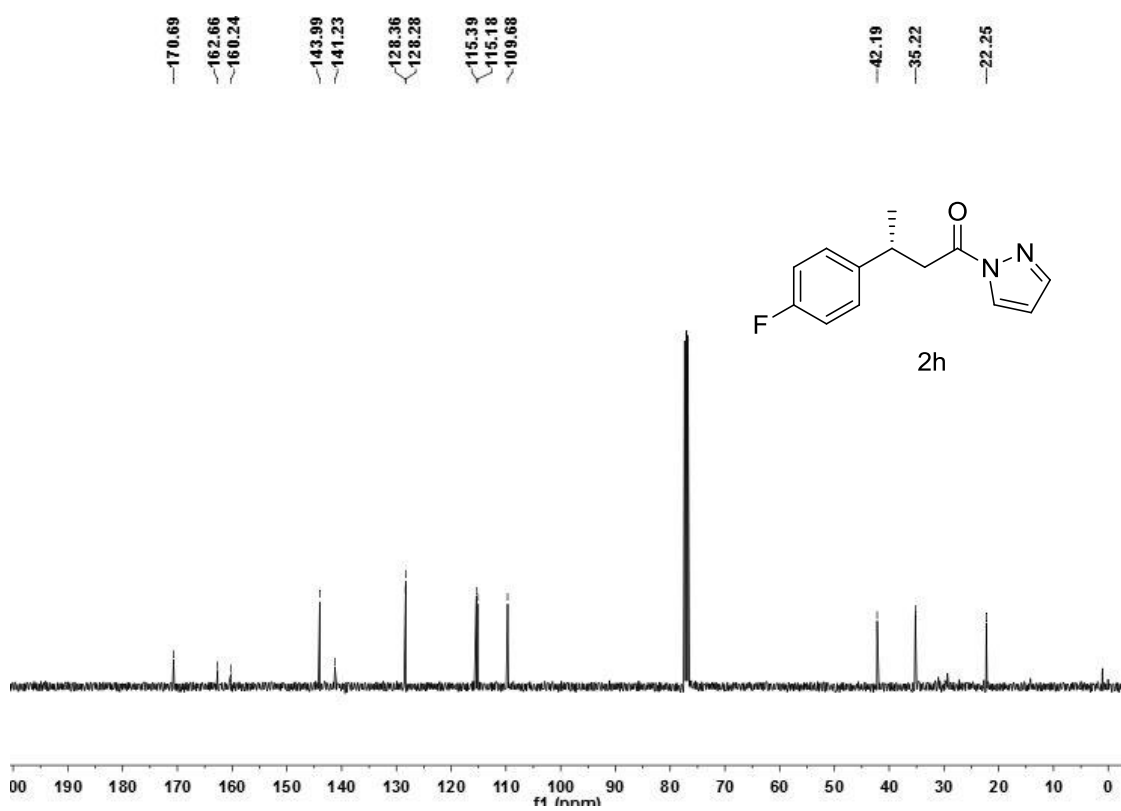

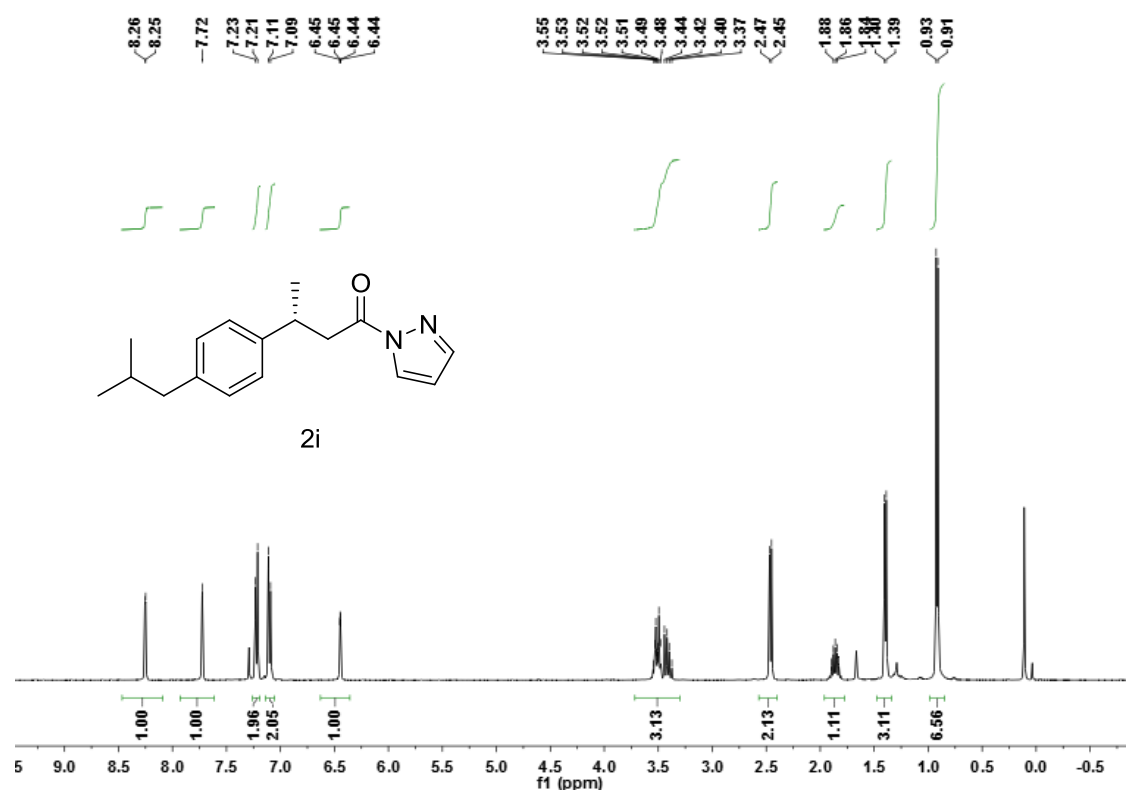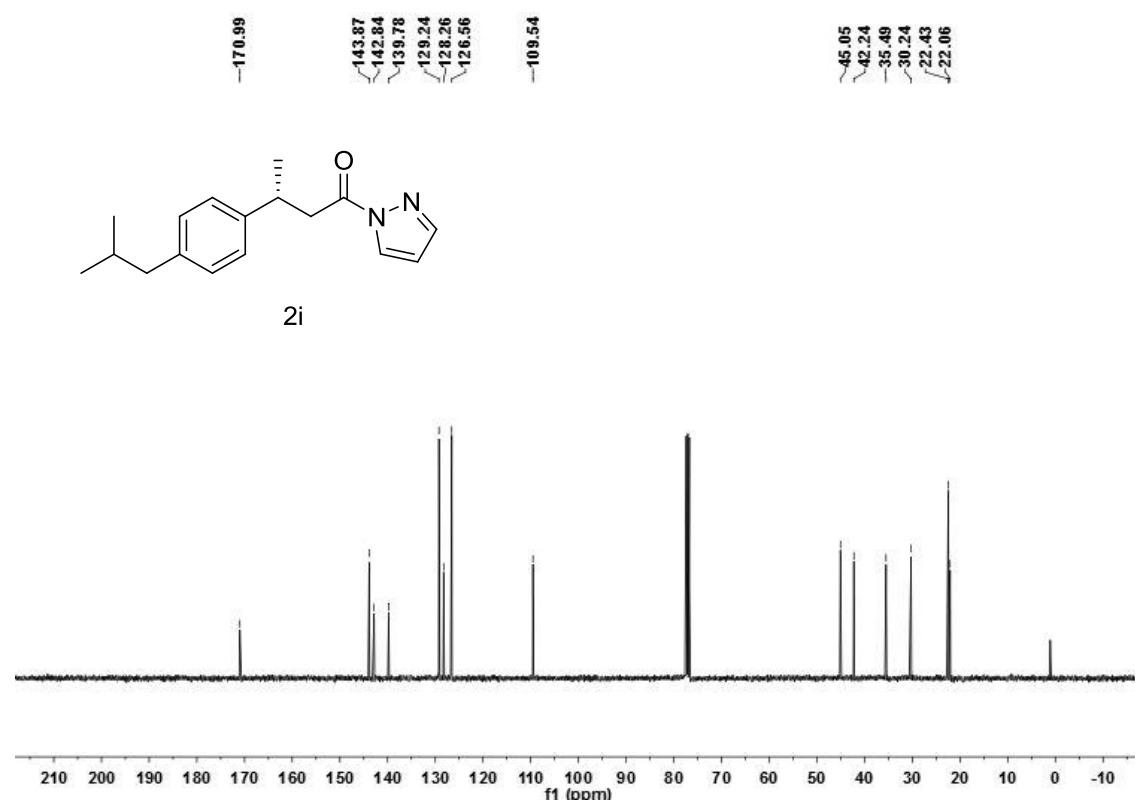

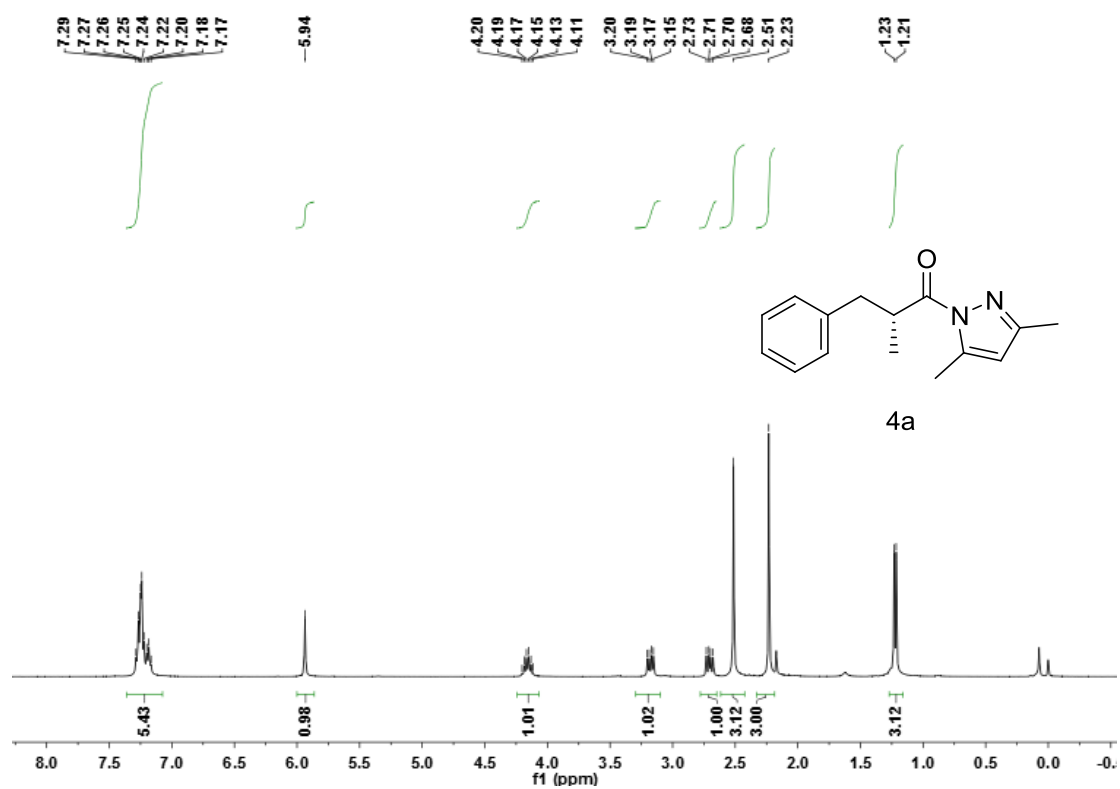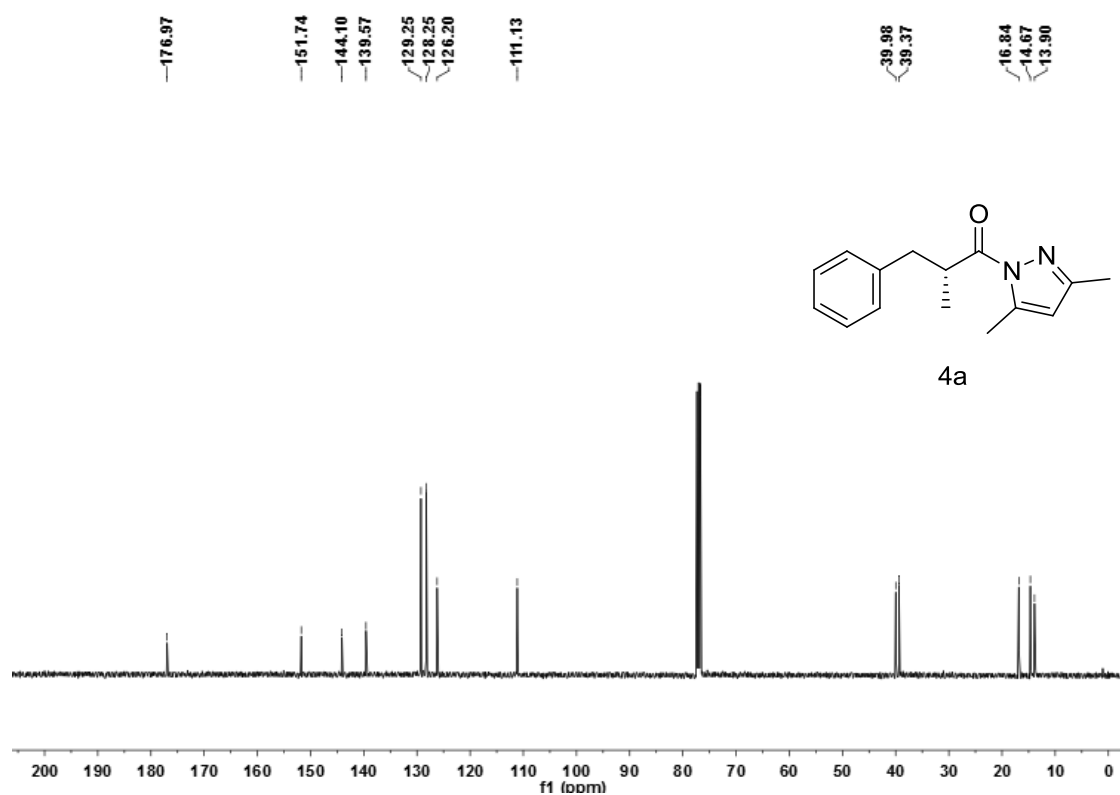

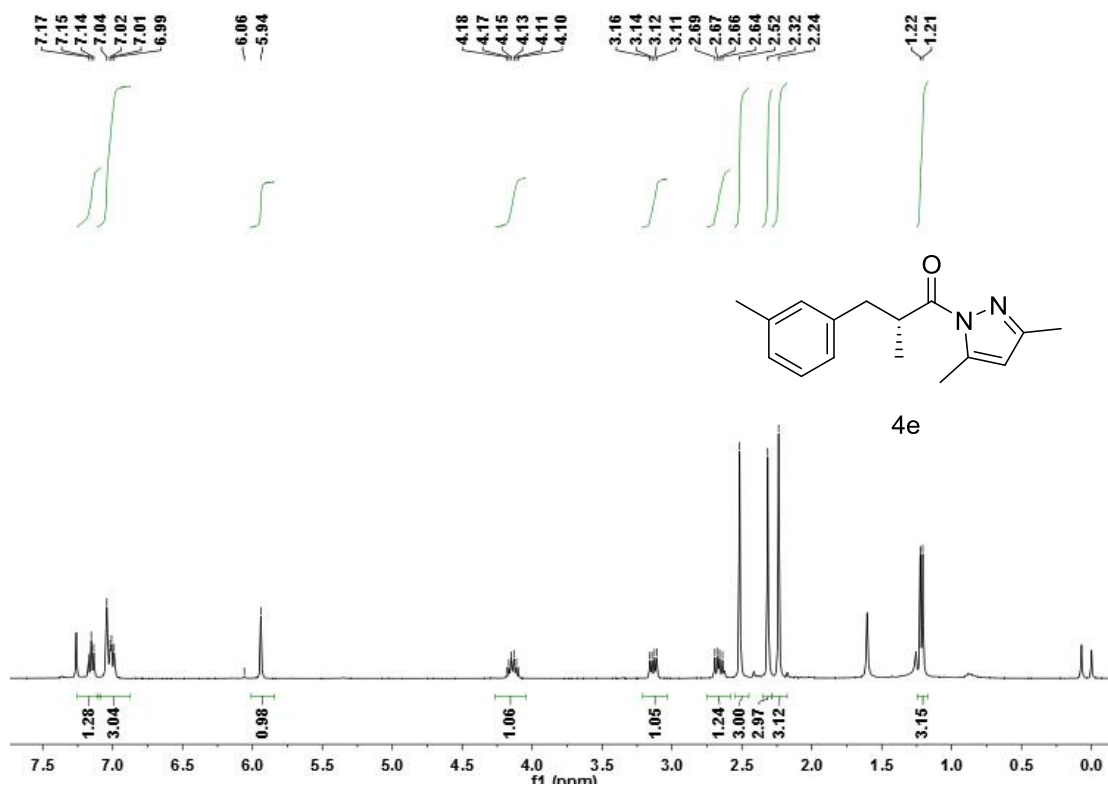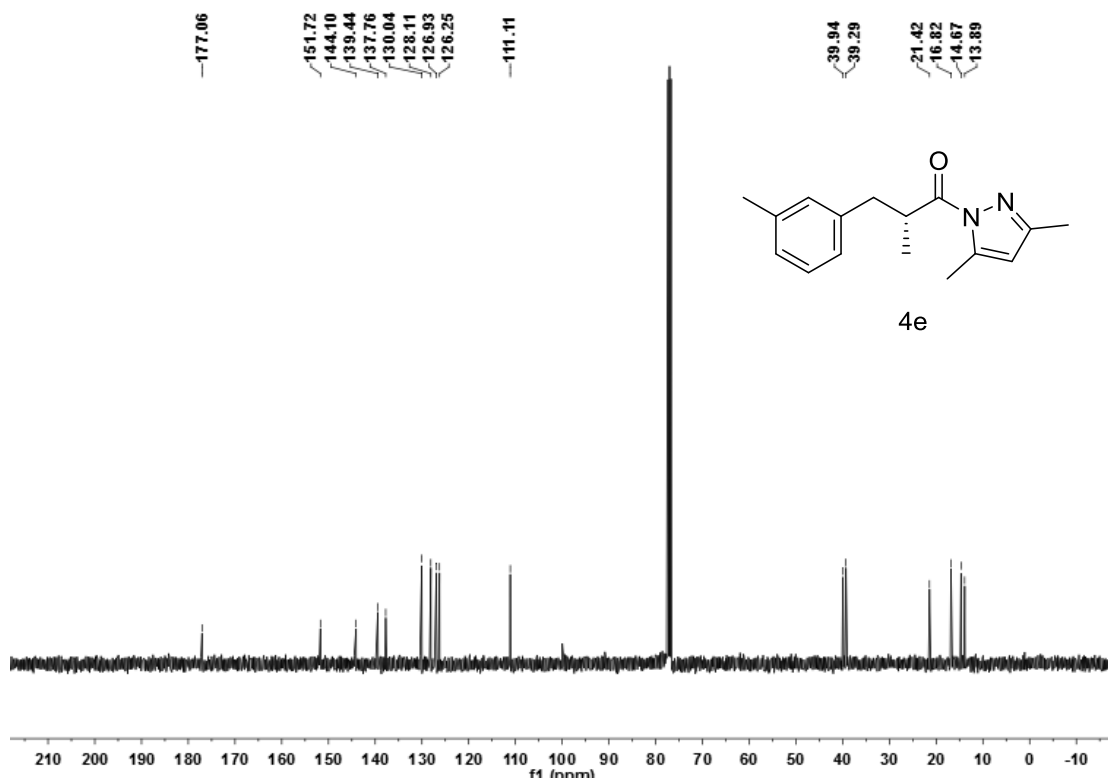



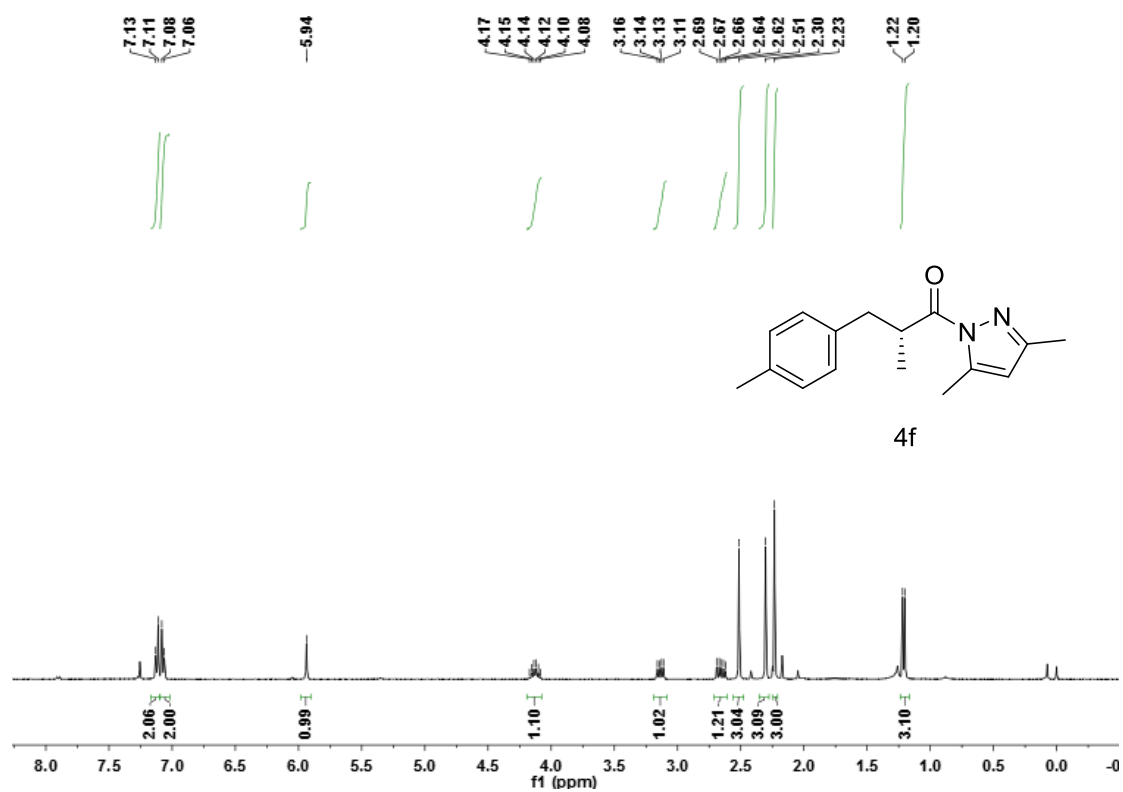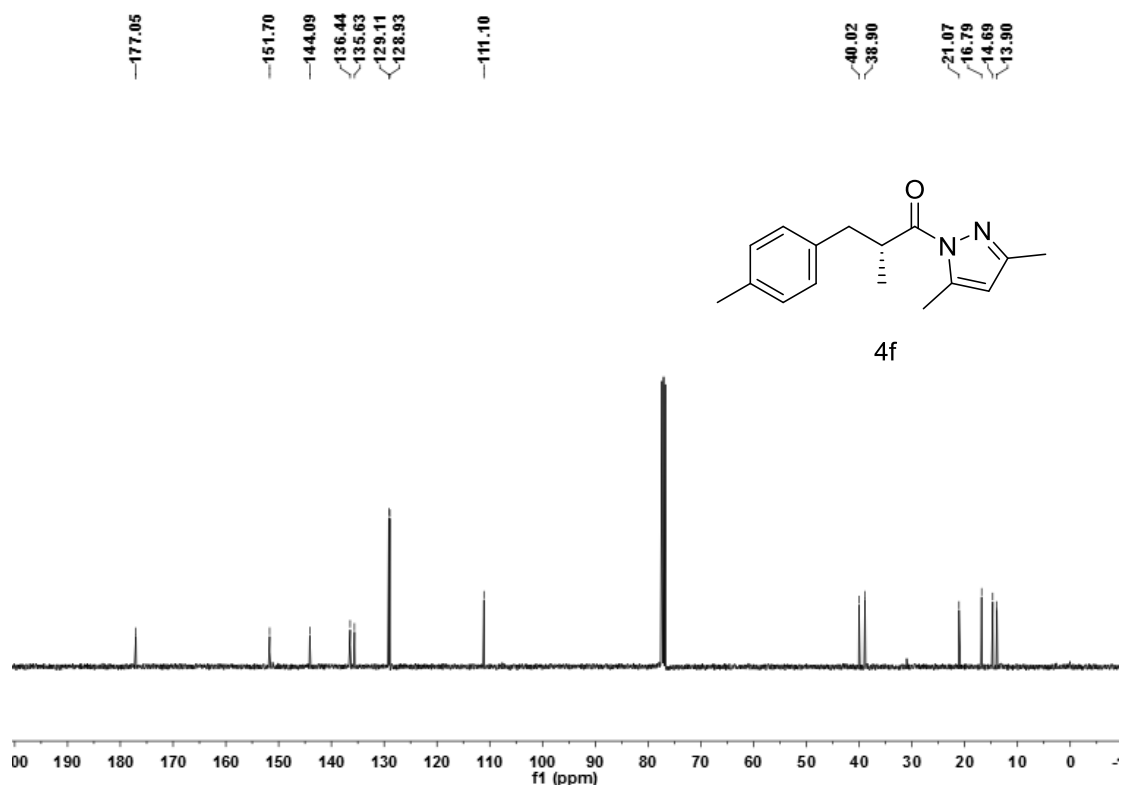

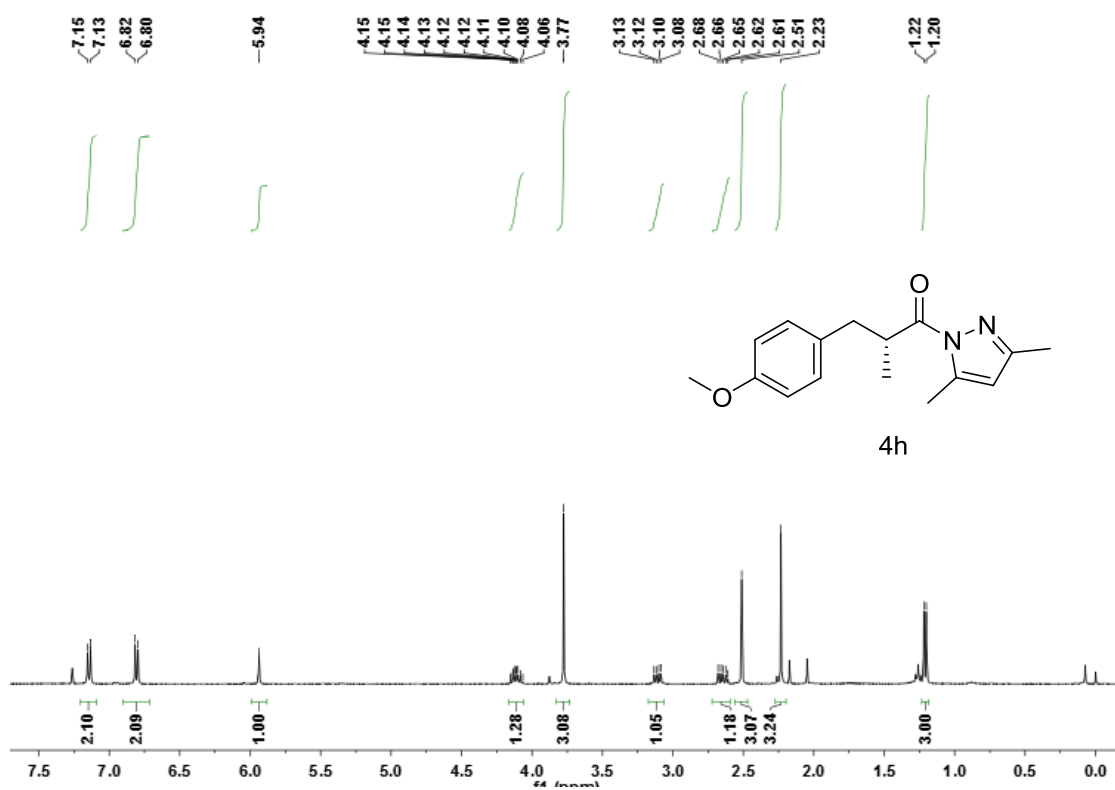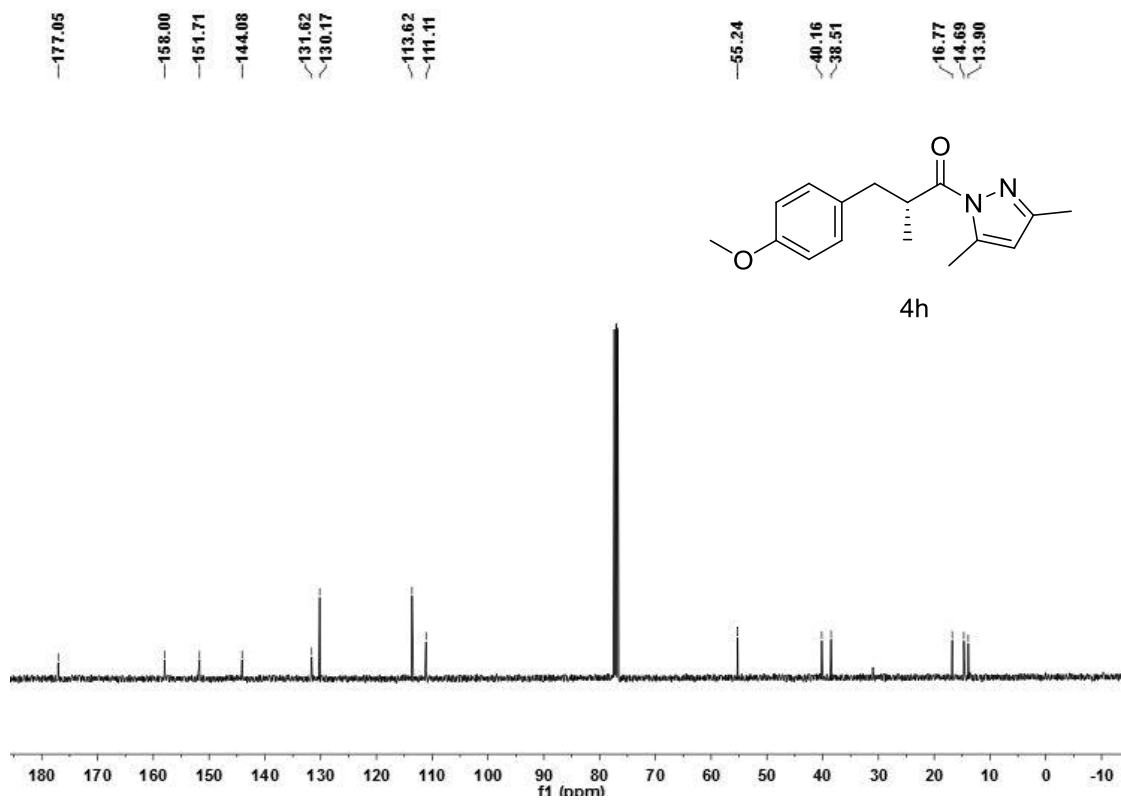

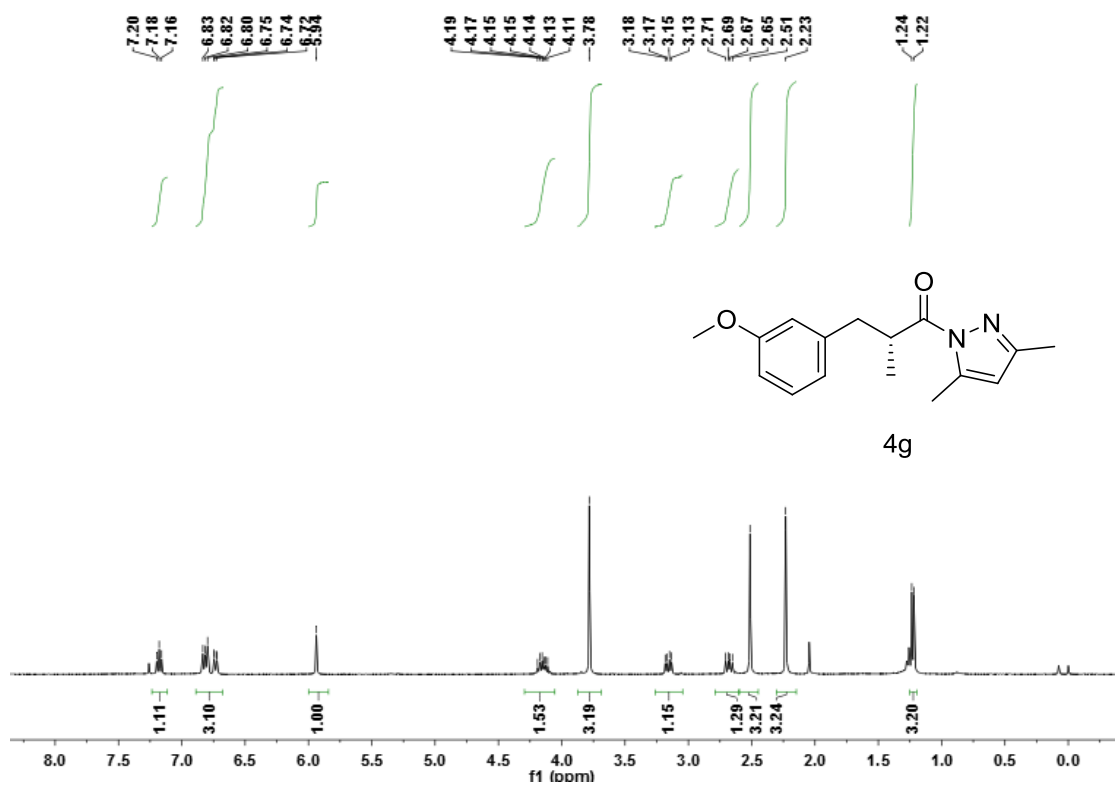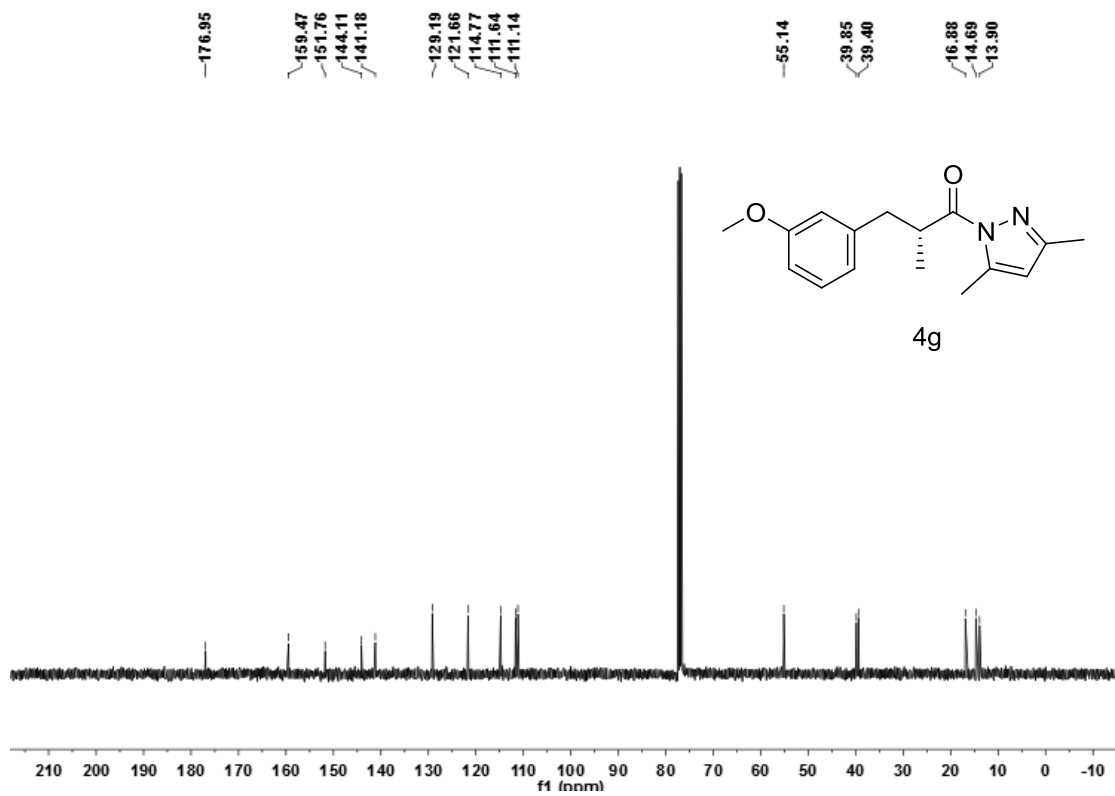

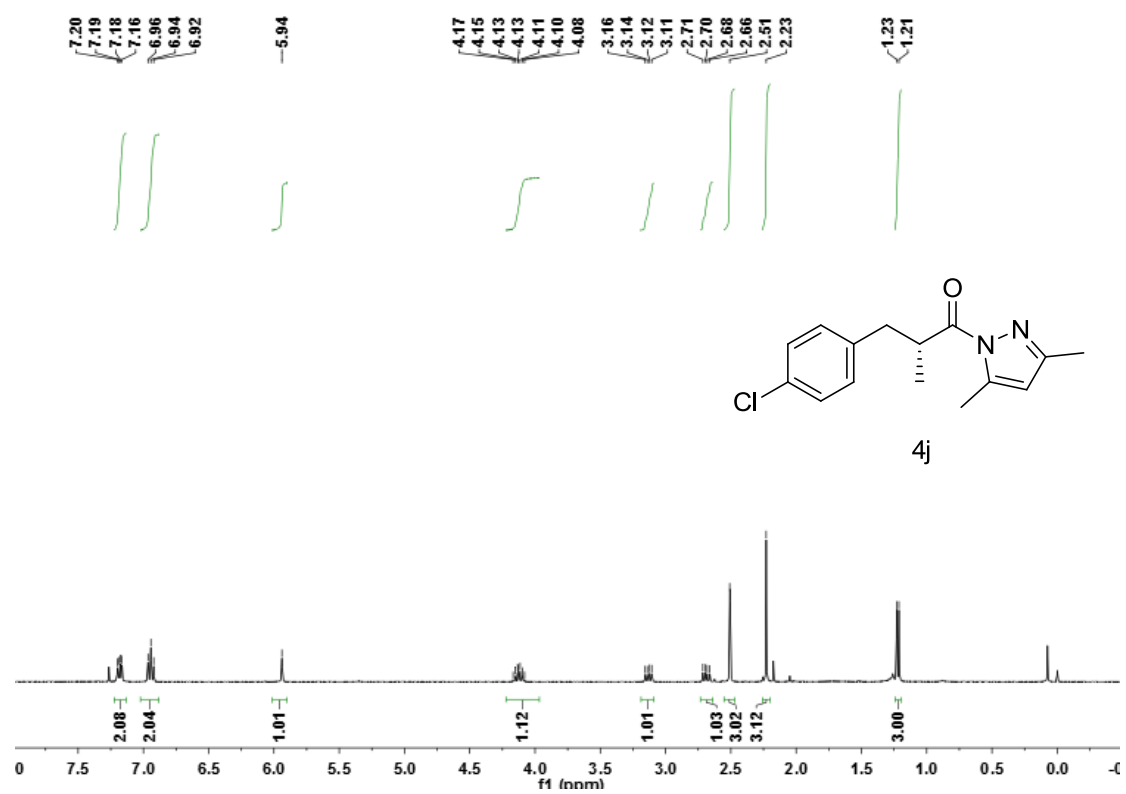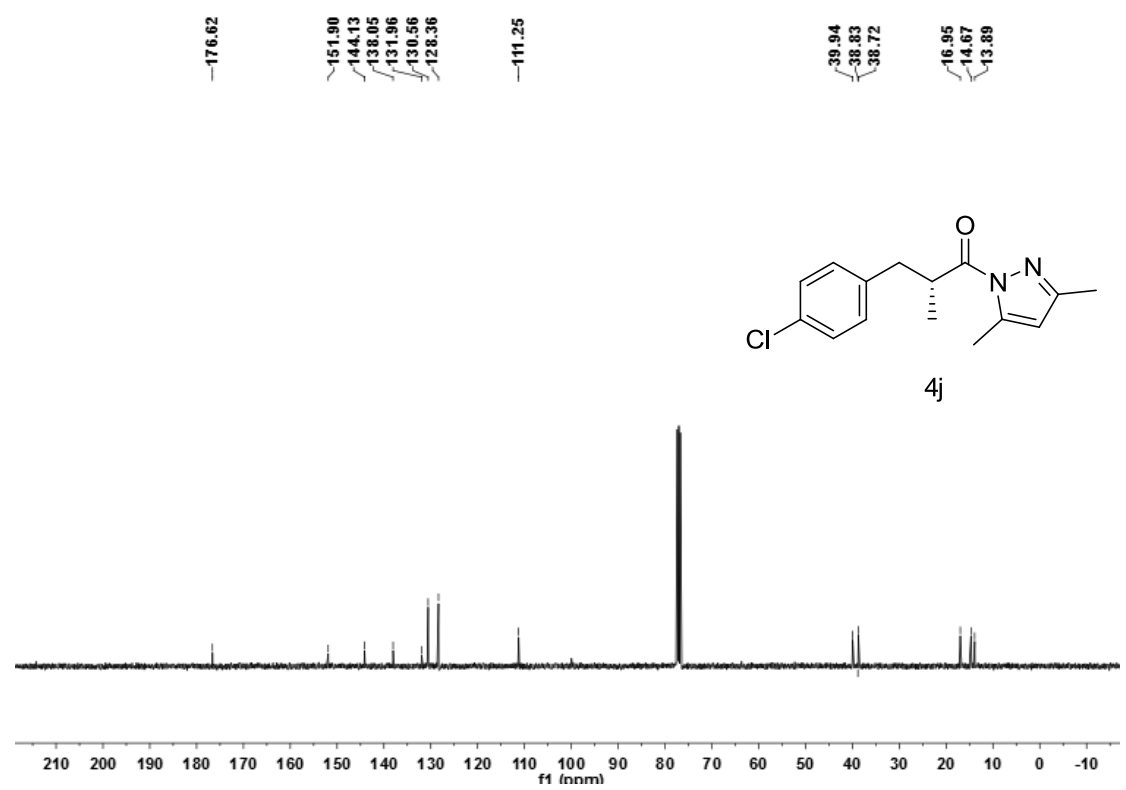

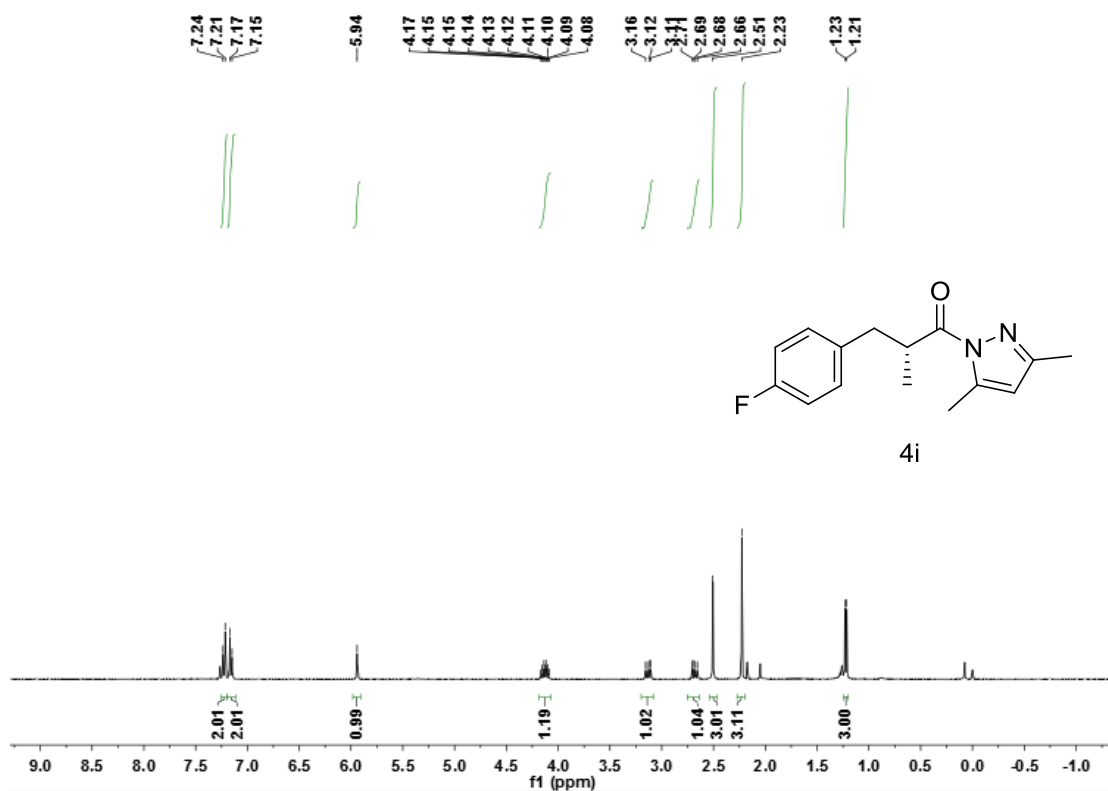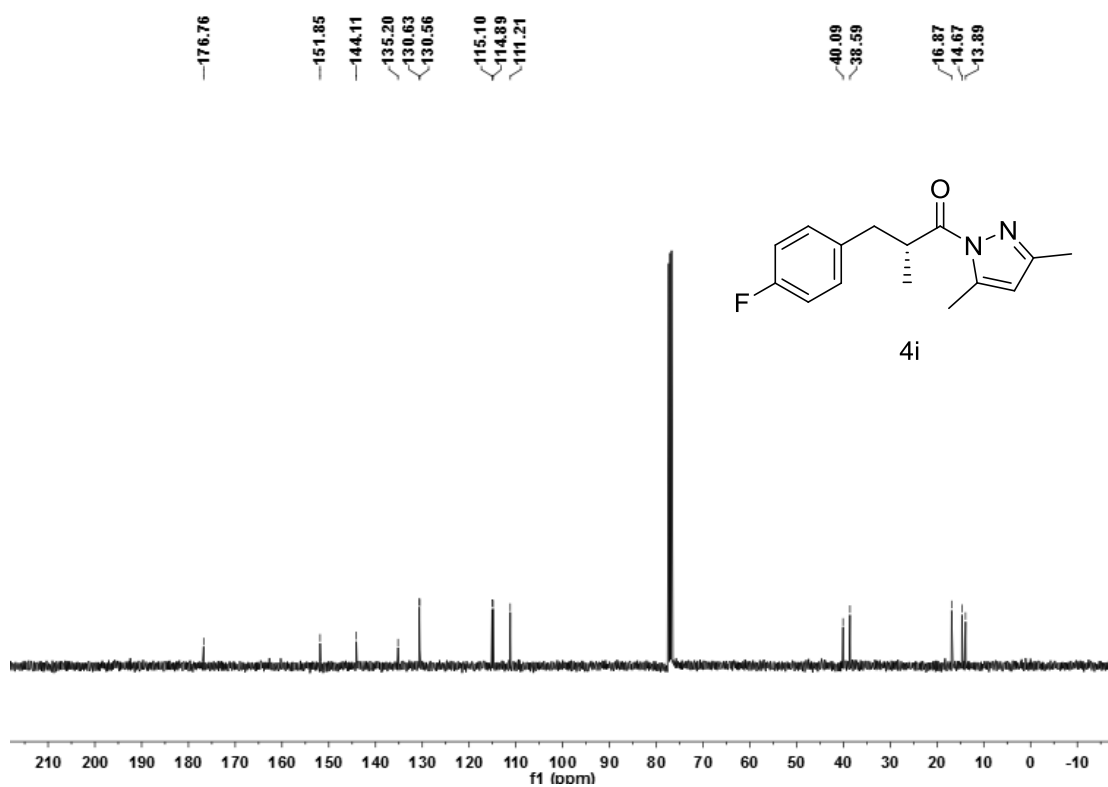

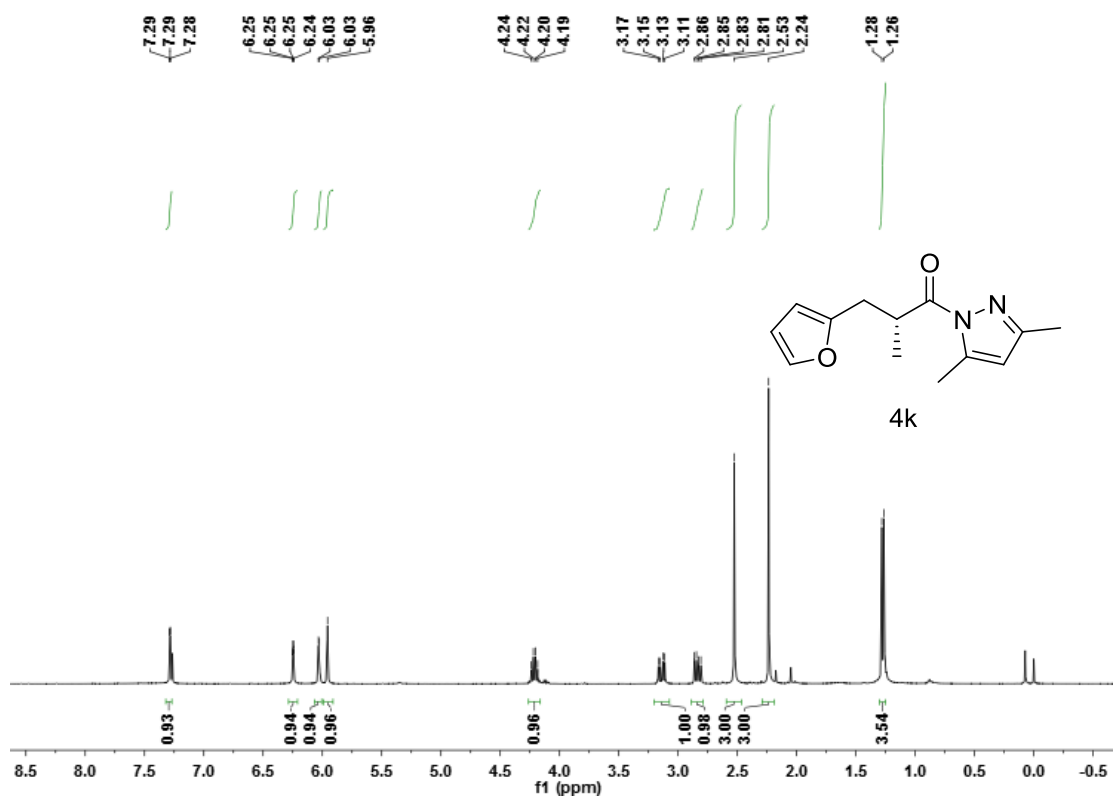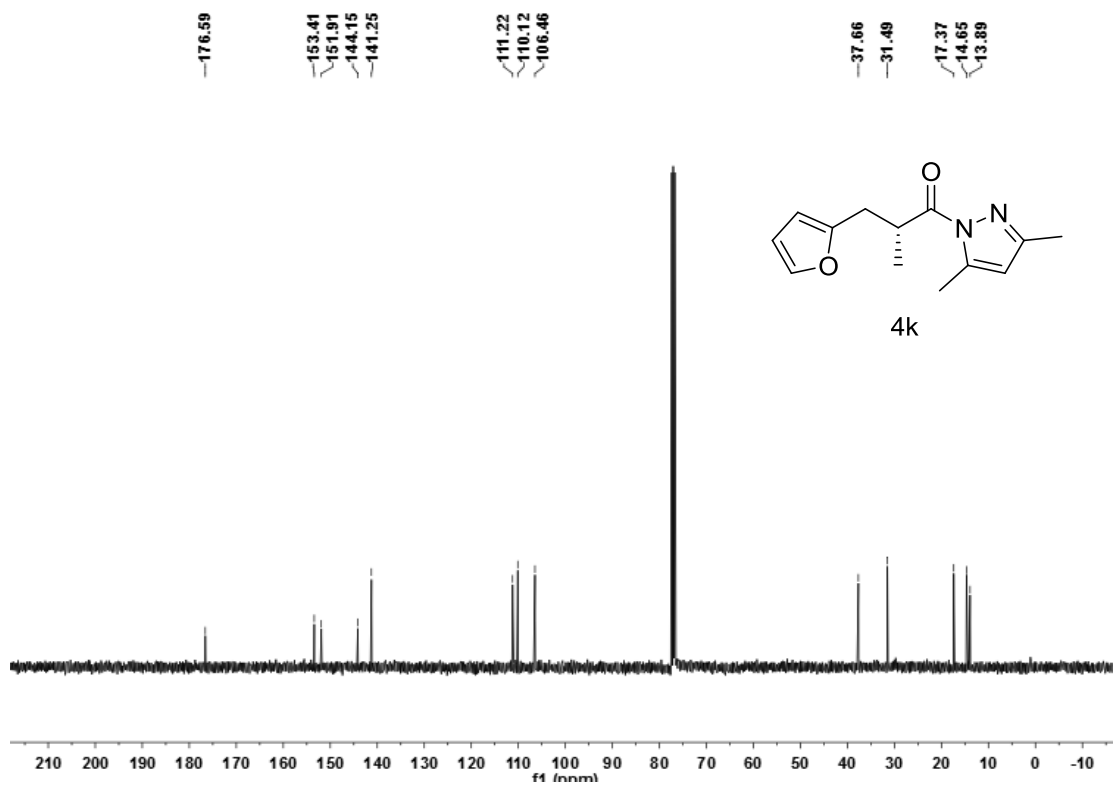

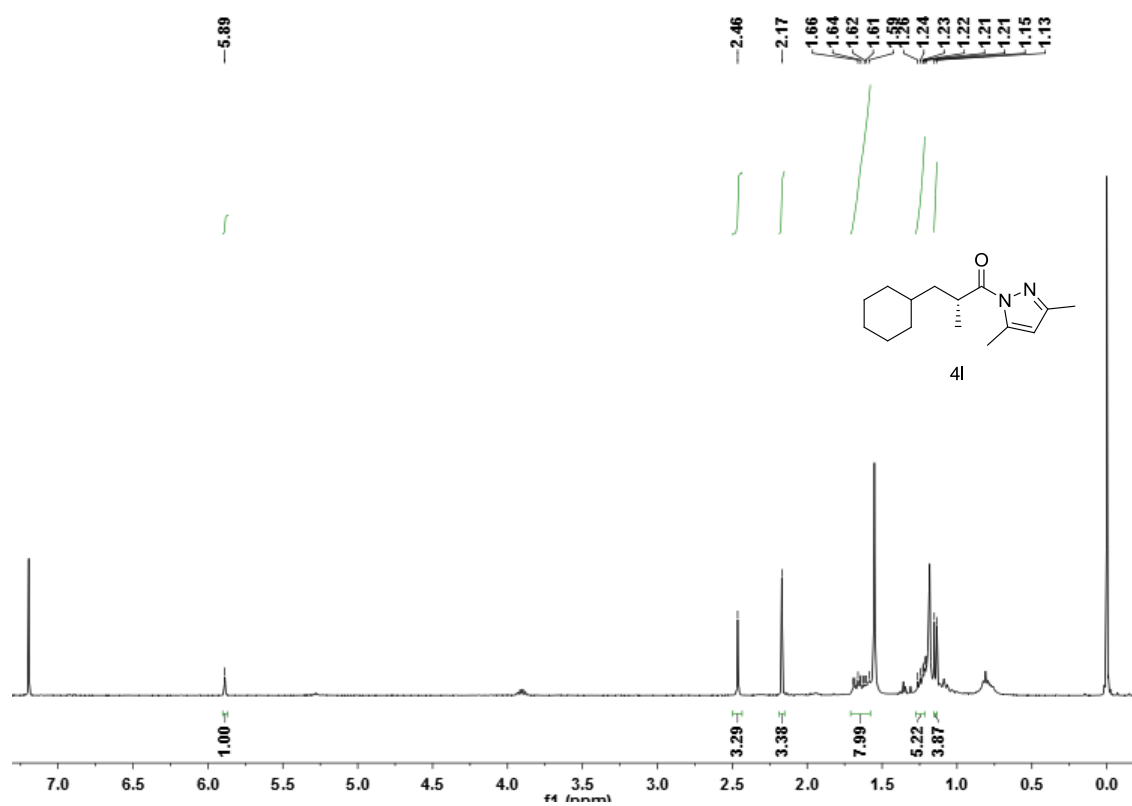

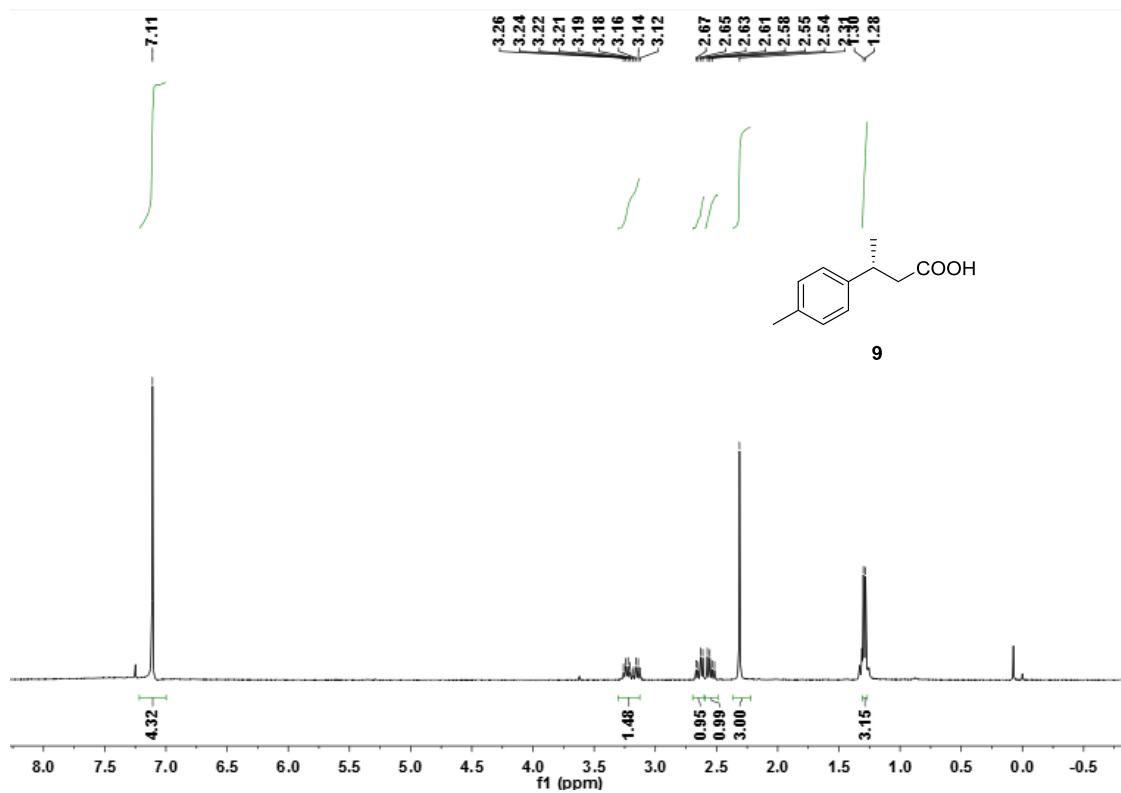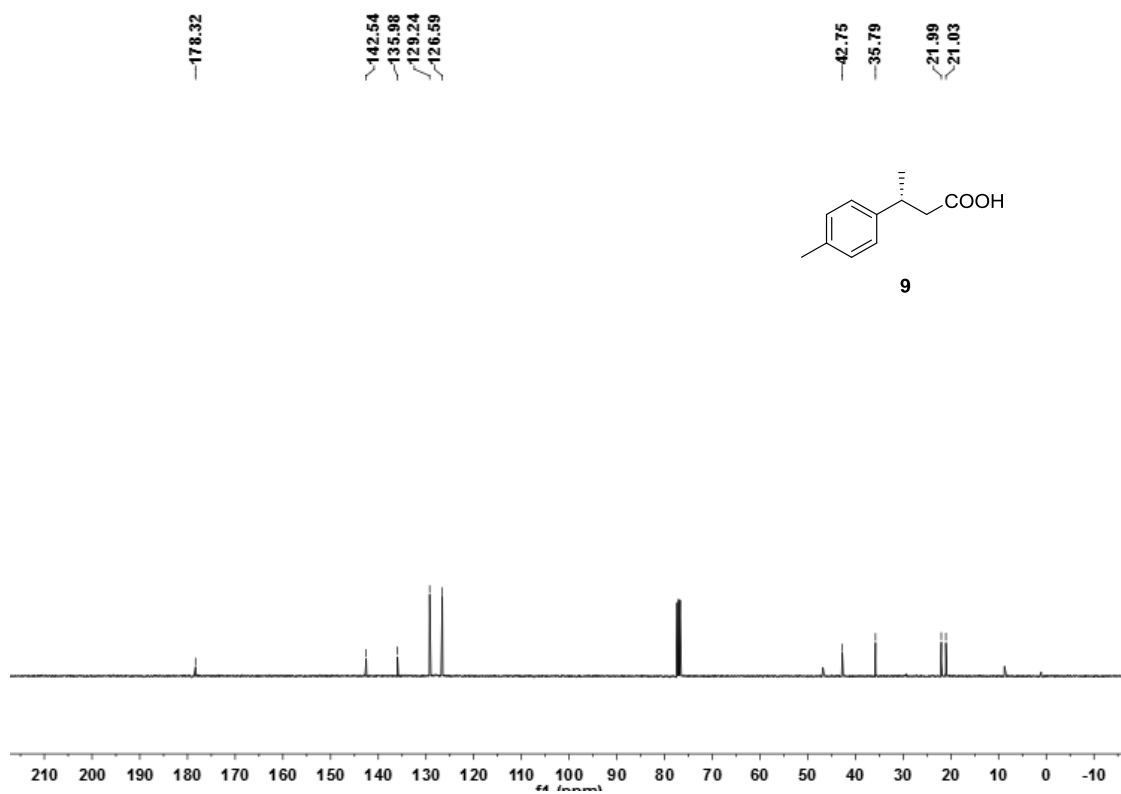



## VI. HPLC spectra

Data File E:\DATA\LP\LP20150608\LP20150608-4 2015-06-08 15-25-02\033-0201.D  
Sample Name: LP-1-H XIAOXUAN

```
=====
Acq. Operator   : SYSTEM                      Seq. Line :    2
Acq. Instrument : 1260HPLC-DAD                Location  : Vial 33
Injection Date  : 6/8/2015 3:38:06 PM          Inj       :    1
                                           Inj Volume: 10.000 µl
Acq. Method     : E:\DATA\LP\LP20150608\LP20150608-4 2015-06-08 15-25-02\
DAD-0J(1-6)-95-5-1ML-10U-ALL 30MIN.M
Last changed    : 6/8/2015 3:25:02 PM by SYSTEM
Analysis Method : E:\DATA\LP\LP20150608\LP20150608-4 2015-06-08 15-25-02\
DAD-0J(1-6)-95-5-1ML-10U-ALL 30MIN.M (Sequence Method)
Last changed    : 4/23/2016 4:58:48 PM by SYSTEM
                (modified after loading)
Additional Info : Peak(s) manually integrated
=====
```

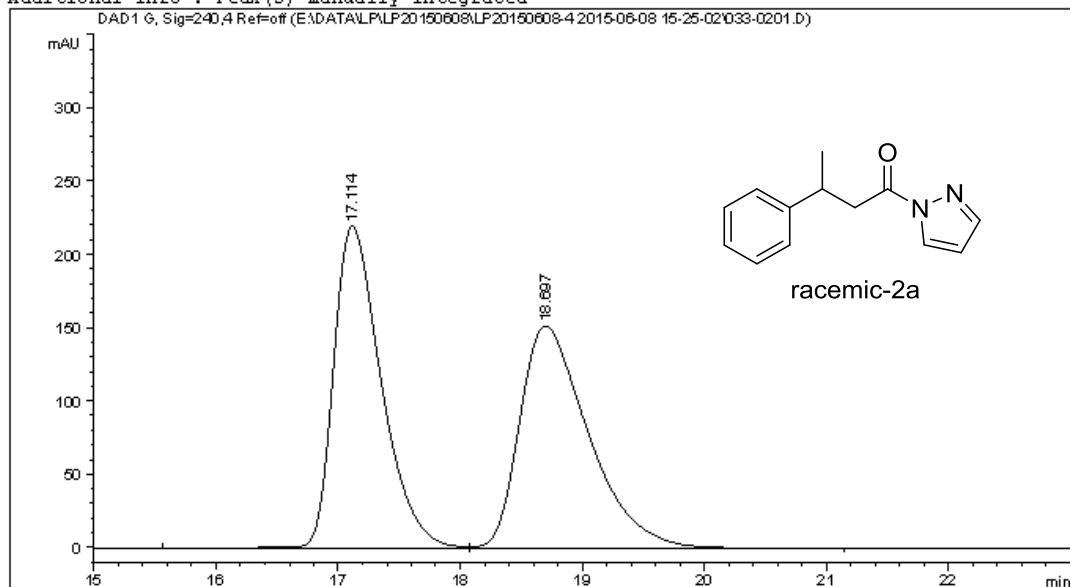

### Area Percent Report

```
Sorted By      : Signal
Multiplier     : 1.0000
Dilution       : 1.0000
Do not use Multiplier & Dilution Factor with ISTDs
```

Signal 1: DAD1 G, Sig=240,4 Ref=off

| Peak # | RetTime [min] | Type | Width [min] | Area [mAU*s] | Height [mAU] | Area %  |
|--------|---------------|------|-------------|--------------|--------------|---------|
| 1      | 17.114        | BV   | 0.4141      | 5904.73633   | 219.32953    | 50.0284 |
| 2      | 18.697        | VB   | 0.5885      | 5898.03955   | 151.41437    | 49.9716 |

Totals : 1.18028e4 370.74390

\*\*\* End of Report \*\*\*

Data File E:\DATA\LP\LP20150608\LP20150608-4 2015-06-08 15-25-02\043-0401.D  
Sample Name: LP-1-H 5-1

```
=====
Acq. Operator   : SYSTEM                      Seq. Line :    4
Acq. Instrument : 1260HPLC-DAD                Location  : Vial 43
Injection Date  : 6/8/2015 4:40:05 PM          Inj       :    1
                                           Inj Volume: 10.000 µl
Acq. Method     : E:\DATA\LP\LP20150608\LP20150608-4 2015-06-08 15-25-02\DAD-0J(1-6)-95-5-
                  1ML-10U-ALL 30MIN.M
Last changed    : 6/8/2015 3:25:02 PM by SYSTEM
Analysis Method : E:\DATA\LP\LP20150608\LP20150608-4 2015-06-08 15-25-02\DAD-0J(1-6)-95-5-
                  1ML-10U-ALL 30MIN.M (Sequence Method)
Last changed    : 4/23/2016 5:03:48 PM by SYSTEM
                  (modified after loading)
Additional Info : Peak(s) manually integrated
=====
```

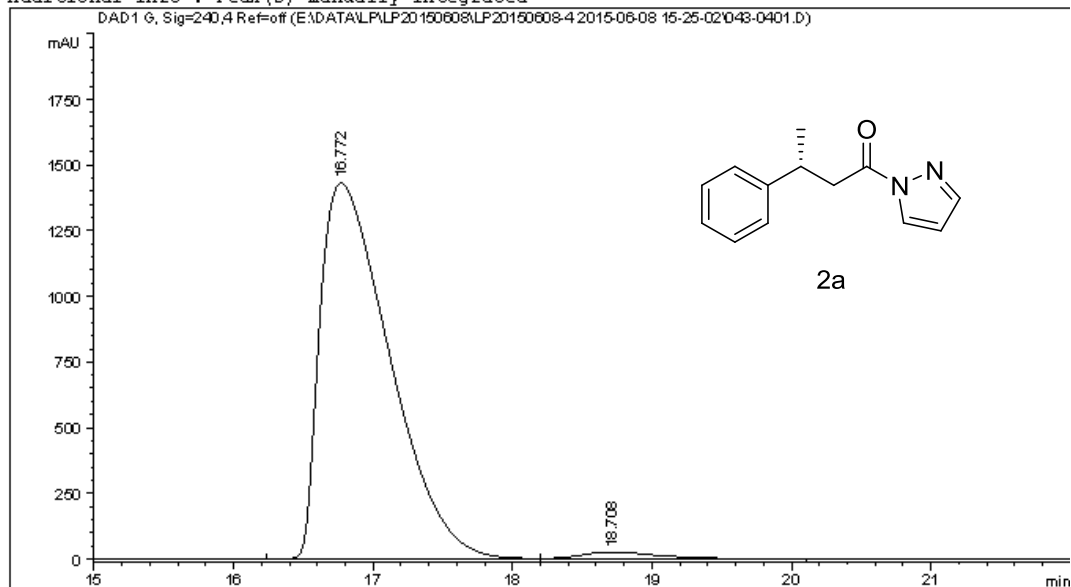

=====  
Area Percent Report  
=====

Sorted By : Signal  
Multiplier : 1.0000  
Dilution : 1.0000  
Do not use Multiplier & Dilution Factor with ISTDs

Signal 1: DAD1 G, Sig=240,4 Ref=off

| Peak # | RetTime [min] | Type | Width [min] | Area [mAU*s] | Height [mAU] | Area %  |
|--------|---------------|------|-------------|--------------|--------------|---------|
| 1      | 16.772        | BV   | 0.5462      | 4.95520e4    | 1430.23523   | 98.0728 |
| 2      | 18.708        | VB   | 0.5835      | 973.71332    | 25.04695     | 1.9272  |

Totals : 5.05257e4 1455.28218

=====  
\*\*\* End of Report \*\*\*

Data File E:\DATA\LP\LP-3-50\LP-3-50-1 (1) 2016-07-06 16-22-41\011-0501.D  
Sample Name: LP-3-50-2

```
=====
Acq. Operator   : SYSTEM                      Seq. Line :    5
Acq. Instrument : 1260HPLC-DAD                Location  : Vial 11
Injection Date  : 7/6/2016 6:01:59 PM          Inj       :    1
                                           Inj Volume: 10.000 µl
Acq. Method     : E:\DATA\LP\LP-3-50\LP-3-50-1 (1) 2016-07-06 16-22-41\DAD-0J(1-6)-95-5-
                  1ML-10U-ALL 30MIN.M
Last changed    : 7/6/2016 5:49:47 PM by SYSTEM
Analysis Method : E:\DATA\LP\LP-3-50\LP-3-50-1 (1) 2016-07-06 16-22-41\DAD-0J(1-6)-95-5-
                  1ML-10U-ALL 30MIN.M (Sequence Method)
Last changed    : 8/23/2016 4:25:07 PM by SYSTEM
                  (modified after loading)
Additional Info : Peak(s) manually integrated
=====
```

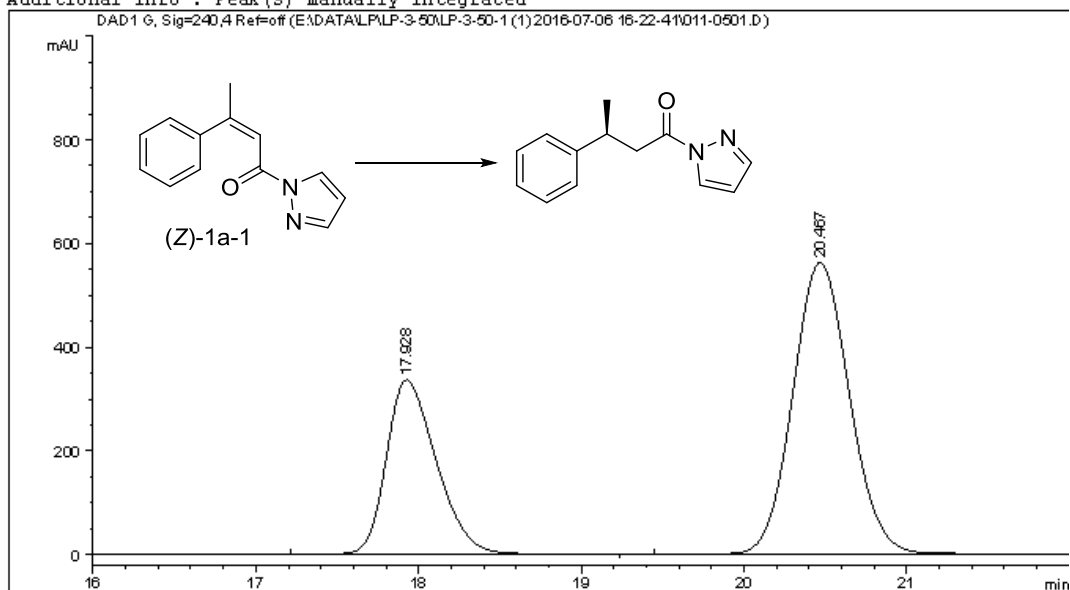

=====  
Area Percent Report  
=====

Sorted By : Signal  
Multiplier : 1.0000  
Dilution : 1.0000  
Do not use Multiplier & Dilution Factor with ISTDs

Signal 1: DAD1 G, Sig=240,4 Ref=off

| Peak # | RetTime [min] | Type | Width [min] | Area [mAU*s] | Height [mAU] | Area %  |
|--------|---------------|------|-------------|--------------|--------------|---------|
| 1      | 17.928        | BB   | 0.3279      | 7128.77686   | 335.52017    | 34.4243 |
| 2      | 20.467        | BB   | 0.3758      | 1.35798e4    | 562.30396    | 65.5757 |

Totals : 2.07086e4 897.82413

=====  
\*\*\* End of Report \*\*\*

Data File E:\DATA\LP\LP20160731\LP20160731 2016-07-31 17-30-12\081-0201.D  
Sample Name: LP

```
=====
Acq. Operator   : SYSTEM                      Seq. Line :    2
Acq. Instrument : 1260HPLC-VWD                Location  : Vial 81
Injection Date  : 7/31/2016 5:34:43 PM        Inj       :    1
                                           Inj Volume: 5.000 µl

Acq. Method     : E:\DATA\LP\LP20160731\LP20160731 2016-07-31 17-30-12\VWD-0J(1-6)-95-5-0.
                  6ML-5UL-210-60MIN.M
Last changed    : 7/31/2016 5:30:12 PM by SYSTEM
Analysis Method : E:\DATA\LP\LP20160731\LP20160731 2016-07-31 17-30-12\VWD-0J(1-6)-95-5-0.
                  6ML-5UL-210-60MIN.M (Sequence Method)
Last changed    : 8/23/2016 4:10:38 PM by SYSTEM
                  (modified after loading)
Additional Info : Peak(s) manually integrated
=====
```

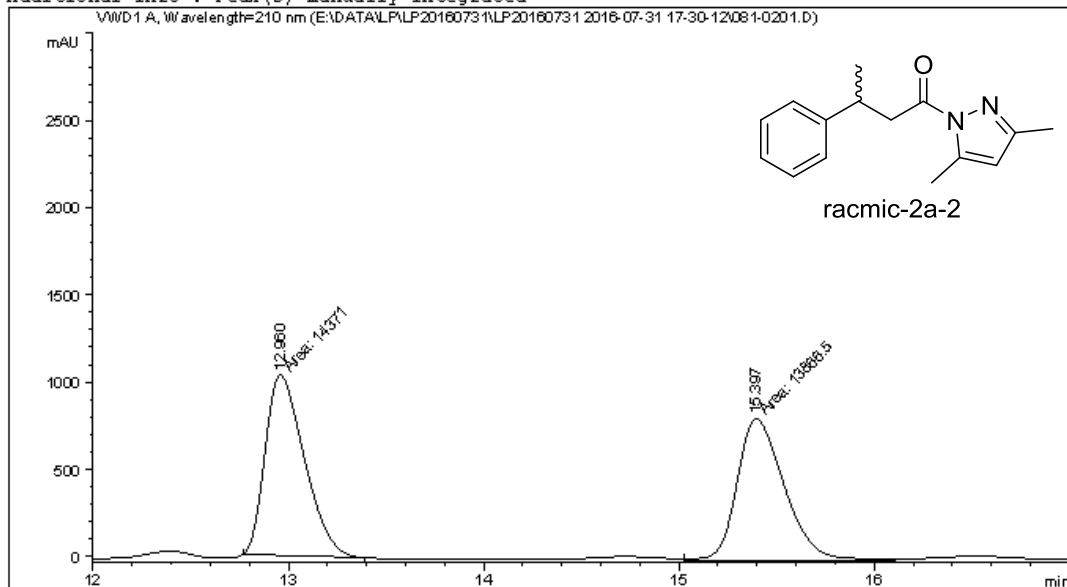

Area Percent Report

```
Sorted By      : Signal
Multiplier     : 1.0000
Dilution       : 1.0000
Do not use Multiplier & Dilution Factor with ISTDs
```

Signal 1: VWD1 A, Wavelength=210 nm

| Peak # | RetTime [min] | Type | Width [min] | Area [mAU*s] | Height [mAU] | Area %  |
|--------|---------------|------|-------------|--------------|--------------|---------|
| 1      | 12.960        | MM   | 0.2322      | 1.43710e4    | 1031.45593   | 50.8932 |
| 2      | 15.397        | MM   | 0.2837      | 1.38665e4    | 814.60529    | 49.1068 |

Totals : 2.82375e4 1846.06122

\*\*\* End of Report \*\*\*

Data File E:\DATA\LP\LP20160731\LP20160731 2016-07-31 17-30-12\081-0201.D  
Sample Name: LP

```
=====
Acq. Operator   : SYSTEM                      Seq. Line :    2
Acq. Instrument : 1260HPLC-VWD                Location  : Vial 81
Injection Date  : 7/31/2016 5:34:43 PM        Inj       :    1
                                           Inj Volume: 5.000 µl
Acq. Method     : E:\DATA\LP\LP20160731\LP20160731 2016-07-31 17-30-12\VWD-0J(1-6)-95-5-0.
                                           6ML-5UL-210-60MIN.M
Last changed    : 7/31/2016 5:30:12 PM by SYSTEM
Analysis Method : E:\DATA\LP\LP20160731\LP20160731 2016-07-31 17-30-12\VWD-0J(1-6)-95-5-0.
                                           6ML-5UL-210-60MIN.M (Sequence Method)
Last changed    : 8/23/2016 4:05:32 PM by SYSTEM
                                           (modified after loading)
Additional Info : Peak(s) manually integrated
=====
```

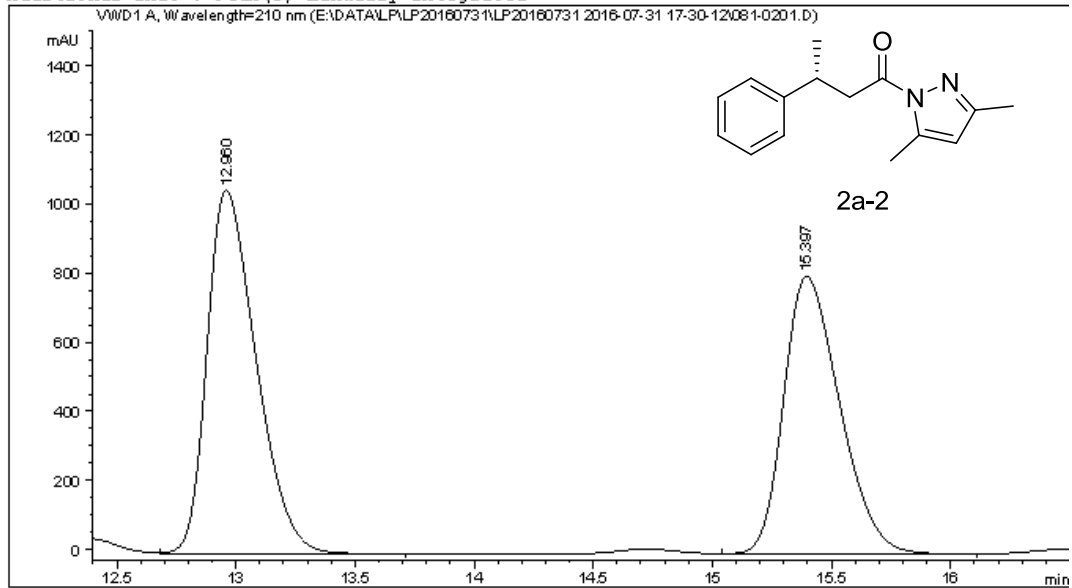

Area Percent Report

```
Sorted By      :      Signal
Multiplier     :      1.0000
Dilution       :      1.0000
Do not use Multiplier & Dilution Factor with ISTDs
```

Signal 1: VWD1 A, Wavelength=210 nm

| Peak # | RetTime [min] | Type | Width [min] | Area [mAU*s] | Height [mAU] | Area %  |
|--------|---------------|------|-------------|--------------|--------------|---------|
| 1      | 12.960        | VB   | 0.2206      | 1.49993e4    | 1050.40625   | 53.3239 |
| 2      | 15.397        | VV   | 0.2527      | 1.31294e4    | 803.13306    | 46.6761 |

Totals : 2.81287e4 1853.53931

\*\*\* End of Report \*\*\*

Data File E:\DATA\LP\LP-1-H\LP-1-H -OCH3 2015-12-15 13-07-44\011-0601.D  
Sample Name: LP-1-H CH3 RAC

```
=====
Acq. Operator   : SYSTEM                      Seq. Line :    6
Acq. Instrument : 1260HPLC-DAD                Location  : Vial 11
Injection Date  : 12/15/2015 4:44:08 PM       Inj       :    1
                                           Inj Volume: 5.000 µl
Acq. Method     : E:\DATA\LP\LP-1-H\LP-1-H -OCH3 2015-12-15 13-07-44\DAD-0J(1-6)-90-0.6ML
                  -ALLNM-60MIN2015-3.M
Last changed    : 12/15/2015 2:04:30 PM by SYSTEM
Analysis Method : E:\DATA\LP\LP-1-H\LP-1-H -OCH3 2015-12-15 13-07-44\DAD-0J(1-6)-90-0.6ML
                  -ALLNM-60MIN2015-3.M (Sequence Method)
Last changed    : 12/22/2015 11:25:38 AM by SYSTEM
                  (modified after loading)
Additional Info : Peak(s) manually integrated
=====
```

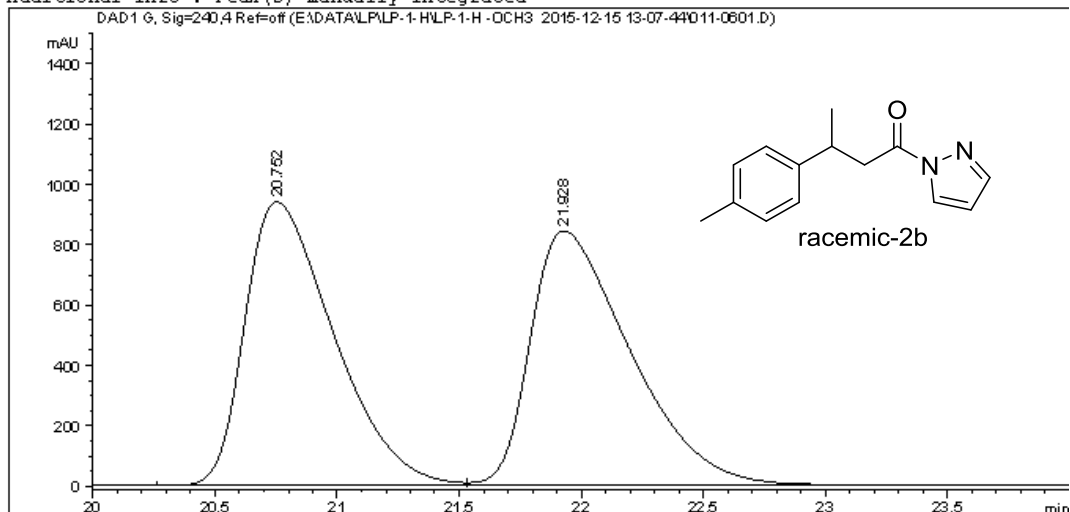

Area Percent Report

```
Sorted By      :      Signal
Multiplier     :      1.0000
Dilution       :      1.0000
Do not use Multiplier & Dilution Factor with ISTDs
```

Signal 1: DAD1 G, Sig=240,4 Ref=off

| Peak # | RetTime [min] | Type | Width [min] | Area [mAU*s] | Height [mAU] | Area %  |
|--------|---------------|------|-------------|--------------|--------------|---------|
| 1      | 20.752        | VV   | 0.3871      | 2.38091e4    | 941.29773    | 49.6589 |
| 2      | 21.928        | VB   | 0.4353      | 2.41362e4    | 844.87860    | 50.3411 |

Totals : 4.79453e4 1786.17633

\*\*\* End of Report \*\*\*

Data File E:\DATA\LP\LP-1-H\LP-1-H -OCH3 2015-12-15 13-07-44\012-0701.D  
Sample Name: LP-1-H -CH3

```
=====
Acq. Operator   : SYSTEM                      Seq. Line :    7
Acq. Instrument : 1260HPLC-DAD                Location  : Vial 12
Injection Date  : 12/15/2015 5:35:06 PM      Inj       :    1
                                           Inj Volume: 5.000 µl
Acq. Method     : E:\DATA\LP\LP-1-H\LP-1-H -OCH3 2015-12-15 13-07-44\DAD-0J (1-6)-90-0.6ML
                  -ALLNM-60MIN2015-3.M
Last changed    : 12/15/2015 2:04:30 PM by SYSTEM
Analysis Method : E:\DATA\LP\LP-1-H\LP-1-H -OCH3 2015-12-15 13-07-44\DAD-0J (1-6)-90-0.6ML
                  -ALLNM-60MIN2015-3.M (Sequence Method)
Last changed    : 12/22/2015 11:27:09 AM by SYSTEM
                  (modified after loading)
Additional Info : Peak(s) manually integrated
=====
```

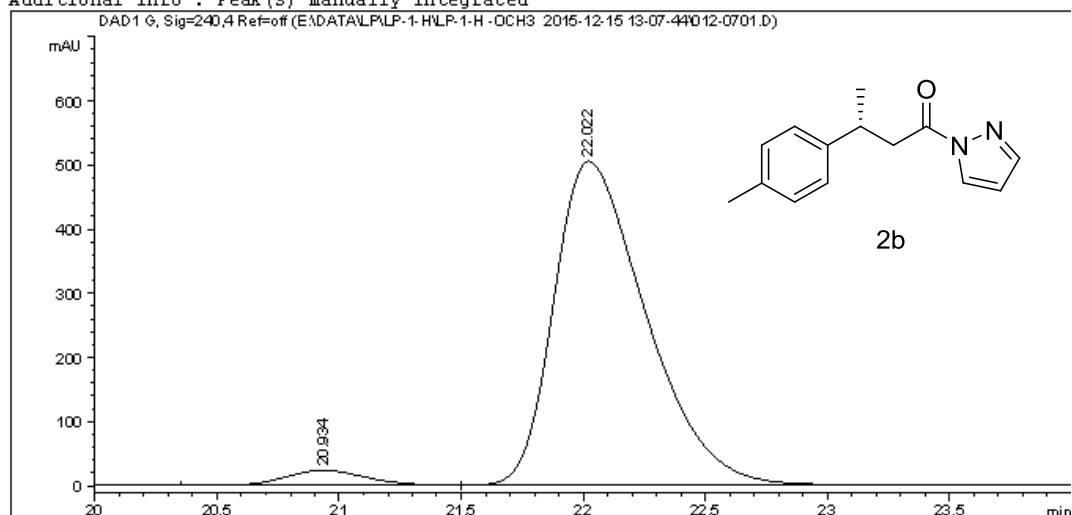

Area Percent Report

```
Sorted By      :      Signal
Multiplier     :      1.0000
Dilution       :      1.0000
Do not use Multiplier & Dilution Factor with ISTDs
```

Signal 1: DAD1 G, Sig=240,4 Ref=off

| Peak # | RetTime [min] | Type | Width [min] | Area [mAU*s] | Height [mAU] | Area %  |
|--------|---------------|------|-------------|--------------|--------------|---------|
| 1      | 20.934        | BV   | 0.3561      | 548.13611    | 23.67835     | 3.9545  |
| 2      | 22.022        | VB   | 0.4034      | 1.33128e4    | 505.21228    | 96.0455 |

Totals : 1.38609e4 528.89063

\*\*\* End of Report \*\*\*

Data File E:\DATA\LP\LP-1-H\LP-1-H -F 2015-12-06 18-35-41\032-0801.D  
Sample Name: LP-1-H 3-CH3 RAC

```
=====
Acq. Operator   : SYSTEM                      Seq. Line :    8
Acq. Instrument : 1260HPLC-DAD                Location  : Vial 32
Injection Date  : 12/6/2015 8:25:25 PM        Inj       :    1
                                           Inj Volume: 5.000 µl
Acq. Method     : E:\DATA\LP\LP-1-H\LP-1-H -F 2015-12-06 18-35-41\DAD-0J(1-6)-90-0.6ML-
                  ALLNM-60MIN2015-3.M
Last changed    : 12/6/2015 8:23:10 PM by SYSTEM
Analysis Method : E:\DATA\LP\LP-1-H\LP-1-H -F 2015-12-06 18-35-41\DAD-0J(1-6)-90-0.6ML-
                  ALLNM-60MIN2015-3.M (Sequence Method)
Last changed    : 12/6/2015 8:51:08 PM by SYSTEM
                  (modified after loading)
Additional Info : Peak(s) manually integrated
=====
```

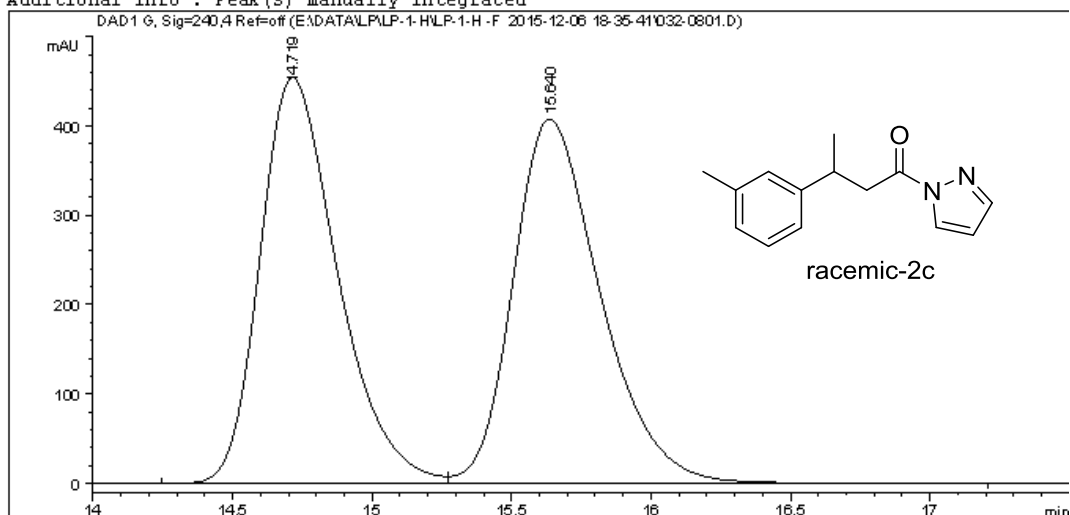

Area Percent Report

```
Sorted By      :      Signal
Multiplier     :      1.0000
Dilution       :      1.0000
Do not use Multiplier & Dilution Factor with ISTDs
```

Signal 1: DAD1 G, Sig=240,4 Ref=off

| Peak # | RetTime [min] | Type | Width [min] | Area [mAU*s] | Height [mAU] | Area %  |
|--------|---------------|------|-------------|--------------|--------------|---------|
| 1      | 14.719        | BV   | 0.2955      | 8786.37305   | 454.61768    | 49.6933 |
| 2      | 15.640        | VB   | 0.3322      | 8894.83984   | 408.25012    | 50.3067 |

Totals : 1.76812e4 862.86780

\*\*\* End of Report \*\*\*



Data File E:\DATA\LP\LP-1-H\LP-1-H -F 2015-12-06 18-35-41\031-0901.D  
Sample Name: LP-1-H 3-CH3

```
=====
Acq. Operator   : SYSTEM                      Seq. Line :    9
Acq. Instrument : 1260HPLC-DAD                Location  : Vial 31
Injection Date  : 12/6/2015 8:46:20 PM        Inj       :    1
                                           Inj Volume: 5.000 µl
Acq. Method     : E:\DATA\LP\LP-1-H\LP-1-H -F 2015-12-06 18-35-41\DAD-0J(1-6)-90-0.6ML-
                  ALLNM-60MIN2015-3.M
Last changed    : 12/6/2015 8:23:10 PM by SYSTEM
Analysis Method : E:\DATA\LP\LP-1-H\LP-1-H -F 2015-12-06 18-35-41\DAD-0J(1-6)-90-0.6ML-
                  ALLNM-60MIN2015-3.M (Sequence Method)
Last changed    : 12/6/2015 9:14:39 PM by SYSTEM
                  (modified after loading)
Additional Info : Peak(s) manually integrated
=====
```

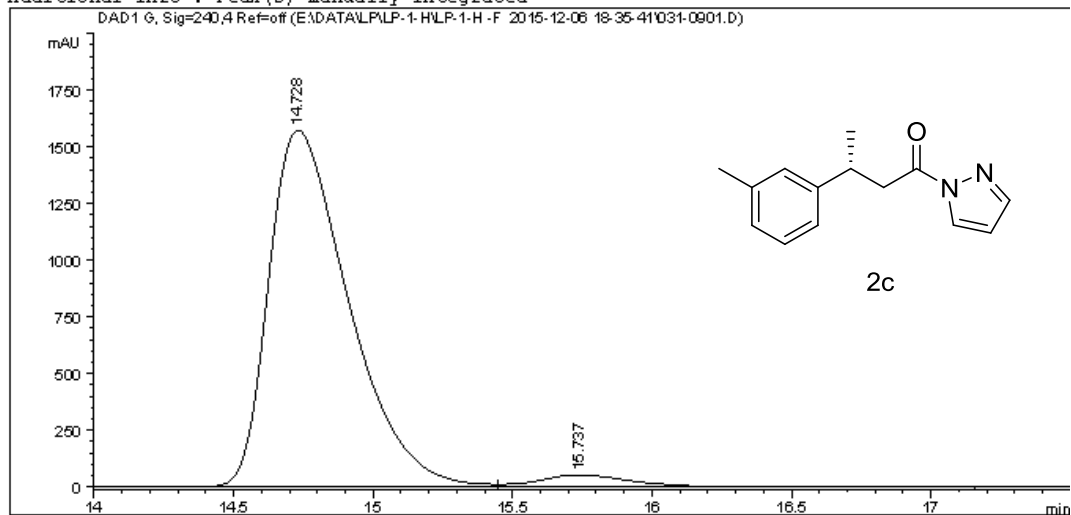

Area Percent Report

```
Sorted By      :      Signal
Multiplier     :      1.0000
Dilution       :      1.0000
Do not use Multiplier & Dilution Factor with ISTDs
```

Signal 1: DAD1 G, Sig=240,4 Ref=off

| Peak # | RetTime [min] | Type | Width [min] | Area [mAU*s] | Height [mAU] | Area %  |
|--------|---------------|------|-------------|--------------|--------------|---------|
| 1      | 14.728        | BV   | 0.3062      | 3.13390e4    | 1574.60608   | 96.2315 |
| 2      | 15.737        | VB   | 0.3462      | 1227.26953   | 52.98319     | 3.7685  |

Totals : 3.25663e4 1627.58927

\*\*\* End of Report \*\*\*

Data File E:\DATA\LP\LP-1-H\LP-1-H -OCH3 2015-12-15 13-07-44\031-0201.D  
Sample Name: LP-1-H -OCH3 RAC

```
=====
Acq. Operator   : SYSTEM                      Seq. Line :    2
Acq. Instrument : 1260HPLC-DAD                Location  : Vial 31
Injection Date  : 12/15/2015 1:20:20 PM        Inj       :    1
                                           Inj Volume: 5.000 µl
Acq. Method     : E:\DATA\LP\LP-1-H\LP-1-H -OCH3 2015-12-15 13-07-44\
                  -ALLNM-60MIN2015-3.M        DAD-0J(1-6)-90-0.6ML
Last changed    : 12/15/2015 2:04:30 PM by SYSTEM
                  (modified after loading)
Analysis Method : E:\DATA\LP\LP-1-H\LP-1-H -OCH3 2015-12-15 13-07-44\
                  -ALLNM-60MIN2015-3.M (Sequence Method)
Last changed    : 12/22/2015 11:16:03 AM by SYSTEM
                  (modified after loading)
Additional Info  : Peak(s) manually integrated
=====
```

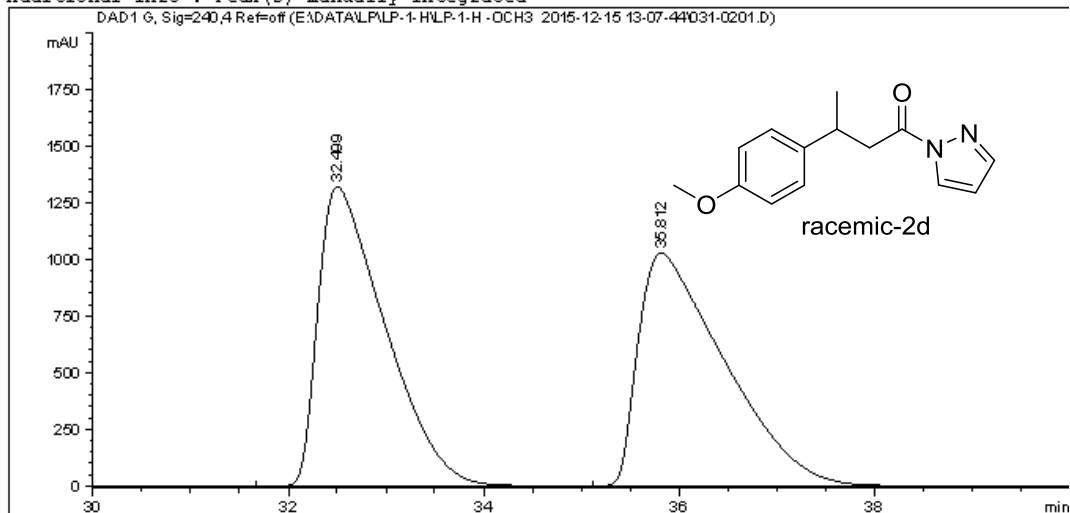

=====  
Area Percent Report  
=====

Sorted By : Signal  
Multiplier : 1.0000  
Dilution : 1.0000  
Do not use Multiplier & Dilution Factor with ISTDs

Signal 1: DAD1 G, Sig=240,4 Ref=off

| Peak # | RetTime [min] | Type | Width [min] | Area [mAU*s] | Height [mAU] | Area %  |
|--------|---------------|------|-------------|--------------|--------------|---------|
| 1      | 32.499        | BB   | 0.7170      | 6.29396e4    | 1323.15295   | 49.8897 |
| 2      | 35.812        | BB   | 0.8963      | 6.32178e4    | 1029.64429   | 50.1103 |

Totals : 1.26157e5 2352.79724

=====  
\*\*\* End of Report \*\*\*

Data File E:\DATA\LP\LP-1-H\LP-1-H -OCH3 2015-12-15 13-07-44\032-0301.D  
Sample Name: LP-1-H -OCH3

```
=====
Acq. Operator   : SYSTEM                      Seq. Line :    3
Acq. Instrument : 1260HPLC-DAD                Location  : Vial 32
Injection Date  : 12/15/2015 2:11:17 PM       Inj       :    1
                                           Inj Volume: 5.000 µl
Acq. Method     : E:\DATA\LP\LP-1-H\LP-1-H -OCH3 2015-12-15 13-07-44\DAD-OJ (1-6)-90-0.6ML
                  -ALLNM-60MIN2015-3.M
Last changed    : 12/15/2015 2:04:30 PM by SYSTEM
Analysis Method : E:\DATA\LP\LP-1-H\LP-1-H -OCH3 2015-12-15 13-07-44\DAD-OJ (1-6)-90-0.6ML
                  -ALLNM-60MIN2015-3.M (Sequence Method)
Last changed    : 12/22/2015 11:19:36 AM by SYSTEM
                  (modified after loading)
Additional Info : Peak(s) manually integrated
=====
```

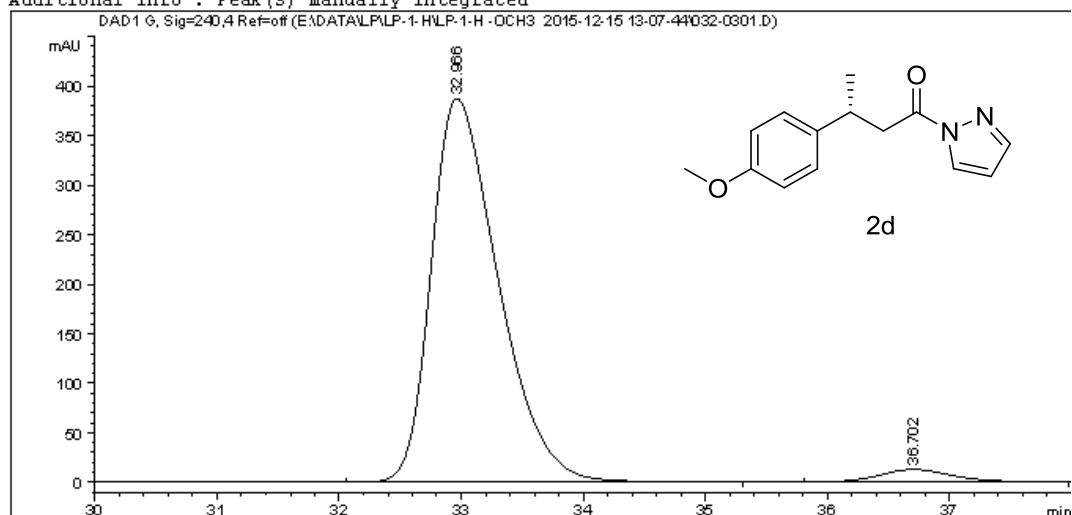

# Area Percent Report

```
Sorted By      : Signal
Multiplier     : 1.0000
Dilution      : 1.0000
Do not use Multiplier & Dilution Factor with ISTDs
```

Signal 1: DAD1 G, Sig=240,4 Ref=off

| Peak # | RetTime [min] | Type | Width [min] | Area [mAU*s] | Height [mAU] | Area %  |
|--------|---------------|------|-------------|--------------|--------------|---------|
| 1      | 32.966        | BB   | 0.5822      | 1.47415e4    | 387.18433    | 96.6631 |
| 2      | 36.702        | BB   | 0.5934      | 508.88422    | 12.43564     | 3.3369  |

Totals : 1.52504e4 399.61997

\*\*\* End of Report \*\*\*

Data File E:\DATA\LP\LP-1-H\LP-1-H -OCH3 2015-12-15 13-07-44\071-0401.D  
Sample Name: LP-1-H -3-OCH3 RAC

```
=====
Acq. Operator   : SYSTEM                      Seq. Line :    4
Acq. Instrument : 1260HPLC-DAD                Location  : Vial 71
Injection Date  : 12/15/2015 3:02:14 PM        Inj       :    1
                                           Inj Volume: 5.000 µl
Acq. Method     : E:\DATA\LP\LP-1-H\LP-1-H -OCH3 2015-12-15 13-07-44\DAD-0J(1-6)-90-0.6ML
                  -ALLNM-60MIN2015-3.M
Last changed    : 12/15/2015 2:04:30 PM by SYSTEM
Analysis Method : E:\DATA\LP\LP-1-H\LP-1-H -OCH3 2015-12-15 13-07-44\DAD-0J(1-6)-90-0.6ML
                  -ALLNM-60MIN2015-3.M (Sequence Method)
Last changed    : 12/22/2015 11:21:28 AM by SYSTEM
                  (modified after loading)
Additional Info : Peak(s) manually integrated
=====
```

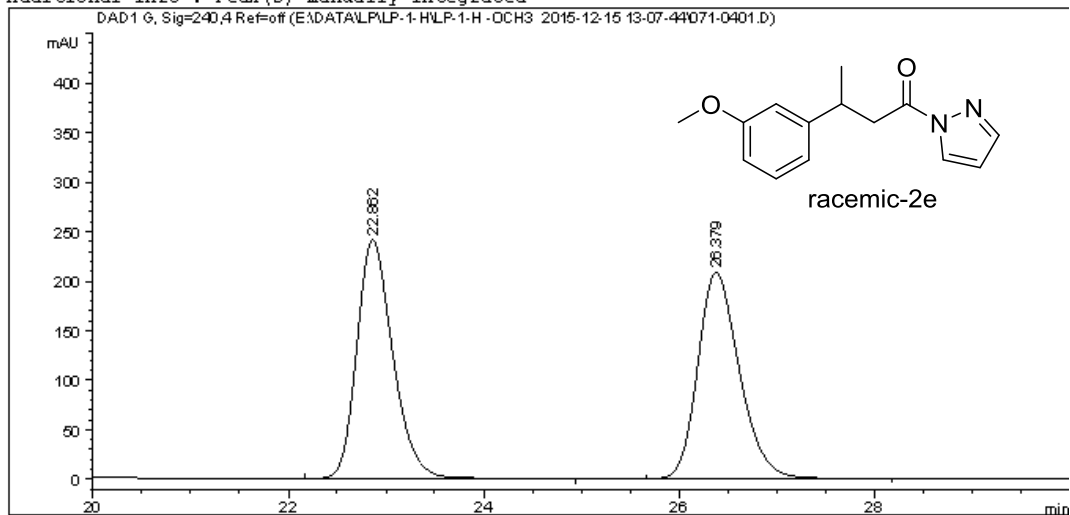

=====  
Area Percent Report  
=====

Sorted By : Signal  
Multiplier : 1.0000  
Dilution : 1.0000  
Do not use Multiplier & Dilution Factor with ISTDs

Signal 1: DAD1 G, Sig=240,4 Ref=off

| Peak # | RetTime [min] | Type | Width [min] | Area [mAU*s] | Height [mAU] | Area %  |
|--------|---------------|------|-------------|--------------|--------------|---------|
| 1      | 22.862        | BB   | 0.3922      | 6149.76563   | 240.59865    | 49.9949 |
| 2      | 26.379        | BB   | 0.4547      | 6151.02441   | 208.18143    | 50.0051 |

Totals : 1.23008e4 448.78008

=====  
\*\*\* End of Report \*\*\*

Data File E:\DATA\LP\LP-1-H\LP-1-H -OCH3 2015-12-15 13-07-44\072-0501.D  
Sample Name: LP-1-H 3-OCH3

```
=====
Acq. Operator   : SYSTEM                      Seq. Line :    5
Acq. Instrument : 1260HPLC-DAD                Location  : Vial 72
Injection Date  : 12/15/2015 3:53:09 PM        Inj       :    1
                                           Inj Volume: 5.000 µl
Acq. Method     : E:\DATA\LP\LP-1-H\LP-1-H -OCH3 2015-12-15 13-07-44\DAD-0J (1-6)-90-0.6ML
                  -ALLNM-60MIN2015-3.M
Last changed    : 12/15/2015 2:04:30 PM by SYSTEM
Analysis Method : E:\DATA\LP\LP-1-H\LP-1-H -OCH3 2015-12-15 13-07-44\DAD-0J (1-6)-90-0.6ML
                  -ALLNM-60MIN2015-3.M (Sequence Method)
Last changed    : 12/22/2015 11:23:32 AM by SYSTEM
                  (modified after loading)
Additional Info : Peak(s) manually integrated
=====
```

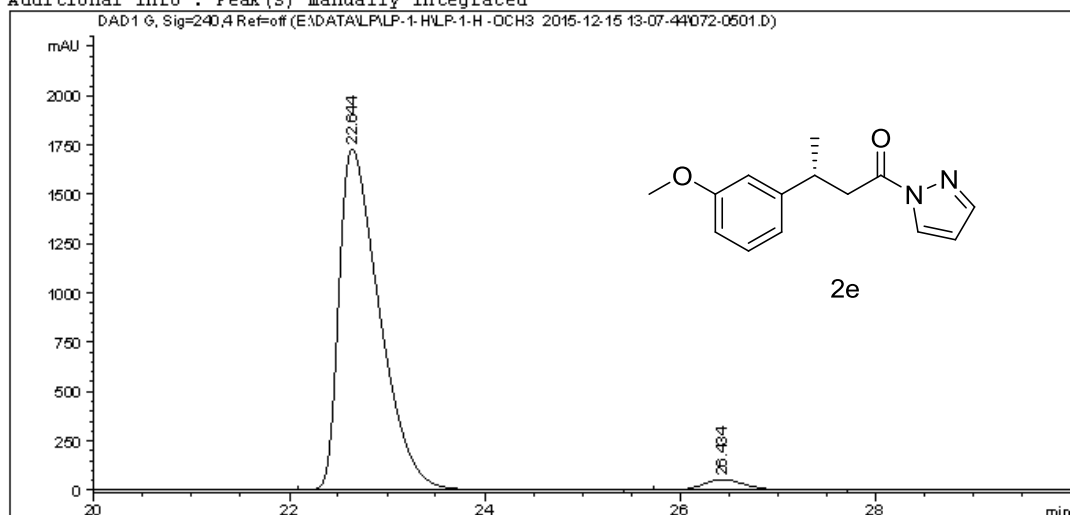

# Area Percent Report

```
Sorted By      :      Signal
Multiplier     :      1.0000
Dilution       :      1.0000
Do not use Multiplier & Dilution Factor with ISTDs
```

Signal 1: DAD1 G, Sig=240,4 Ref=off

| Peak # | RetTime [min] | Type | Width [min] | Area [mAU*s] | Height [mAU] | Area %  |
|--------|---------------|------|-------------|--------------|--------------|---------|
| 1      | 22.644        | BB   | 0.4377      | 4.98479e4    | 1732.20117   | 96.9325 |
| 2      | 26.434        | BB   | 0.4502      | 1577.49573   | 53.78045     | 3.0675  |

Totals : 5.14254e4 1785.98162

\*\*\* End of Report \*\*\*

Data File E:\DATA\LP\LP20150826\LP20150826-1 2015-08-26 11-07-28\071-0201.D  
Sample Name: LP-1-H 4-CL RAC

```
=====
Acq. Operator   : SYSTEM                      Seq. Line :    2
Acq. Instrument : 1260HPLC-VWD                Location  : Vial 71
Injection Date  : 8/26/2015 11:20:06 AM       Inj       :    1
                                           Inj Volume: 5.000 µl
Acq. Method     : E:\DATA\LP\LP20150826\LP20150826-1 2015-08-26 11-07-28\VWD-0J(1-2)-90-10
                  -0.6ML-210NM-60MIN.M
Last changed    : 8/26/2015 11:07:29 AM by SYSTEM
Analysis Method : E:\DATA\LP\LP20150826\LP20150826-1 2015-08-26 11-07-28\VWD-0J(1-2)-90-10
                  -0.6ML-210NM-60MIN.M (Sequence Method)
Last changed    : 4/26/2016 10:57:46 AM by SYSTEM
                  (modified after loading)
Additional Info : Peak(s) manually integrated
=====
```

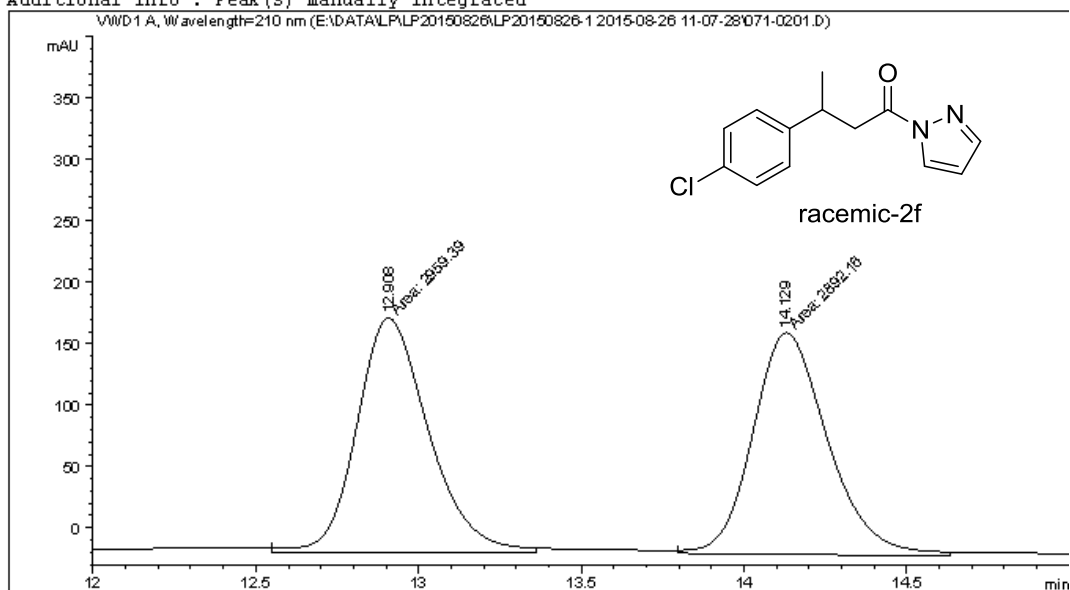

=====  
Area Percent Report  
=====

Sorted By : Signal  
Multiplier : 1.0000  
Dilution : 1.0000  
Do not use Multiplier & Dilution Factor with ISTDs

Signal 1: VWD1 A, Wavelength=210 nm

| Peak # | RetTime [min] | Type | Width [min] | Area [mAU*s] | Height [mAU] | Area %  |
|--------|---------------|------|-------------|--------------|--------------|---------|
| 1      | 12.908        | MM   | 0.2579      | 2959.39258   | 191.28188    | 50.5745 |
| 2      | 14.129        | MM   | 0.2675      | 2892.16089   | 180.20035    | 49.4255 |

Totals : 5851.55347 371.48222

=====  
\*\*\* End of Report \*\*\*

Data File E:\DATA\LP\LP20150812\LP20150812-1 2015-08-12 09-30-47\006-0701.D  
Sample Name: LP-1-H -Cl

```
=====
Acq. Operator   : SYSTEM                      Seq. Line :    7
Acq. Instrument : 1260HPLC-DAD                Location  : Vial 6
Injection Date  : 8/12/2015 1:20:23 PM        Inj       :    1
                                           Inj Volume: 5.000 µl

Acq. Method     : E:\DATA\LP\LP20150812\LP20150812-1 2015-08-12 09-30-47\DAD-0J(1-6)-90-0.
                  6ML-ALLNM-30MIN2015-3.M
Last changed    : 8/12/2015 11:43:25 AM by SYSTEM
Analysis Method : E:\DATA\LP\LP20150812\LP20150812-1 2015-08-12 09-30-47\DAD-0J(1-6)-90-0.
                  6ML-ALLNM-30MIN2015-3.M (Sequence Method)
Last changed    : 4/26/2016 10:42:46 AM by SYSTEM
                  (modified after loading)
Additional Info  : Peak(s) manually integrated
=====
```

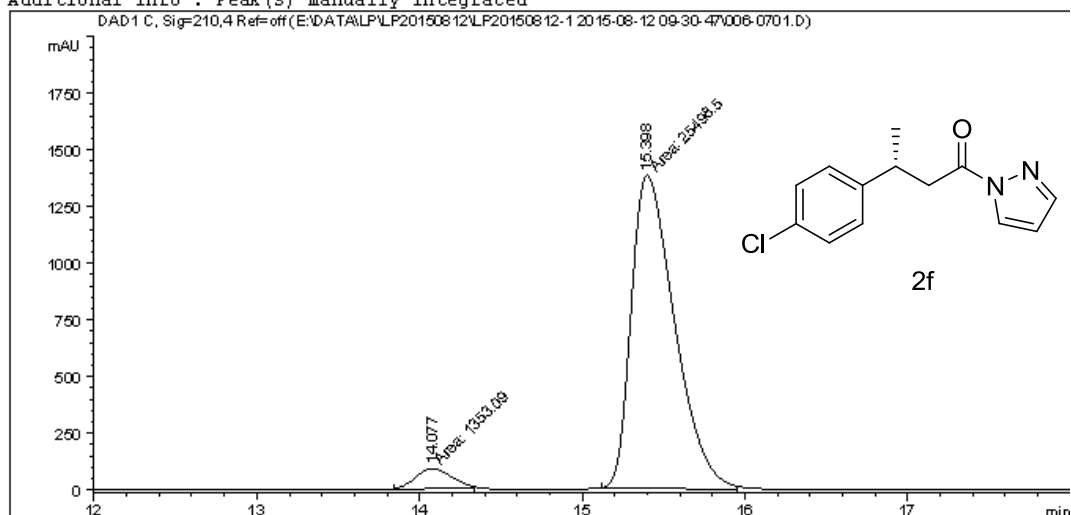

# Area Percent Report

```
Sorted By      :      Signal
Multiplier     :      1.0000
Dilution       :      1.0000
Do not use Multiplier & Dilution Factor with ISTDs
```

Signal 1: DAD1 C, Sig=210,4 Ref=off

| Peak # | RetTime [min] | Type | Width [min] | Area [mAU*s] | Height [mAU] | Area %  |
|--------|---------------|------|-------------|--------------|--------------|---------|
| 1      | 14.077        | MM   | 0.2523      | 1353.08643   | 89.37776     | 5.0391  |
| 2      | 15.398        | MM   | 0.3080      | 2.54985e4    | 1379.89917   | 94.9609 |

Totals : 2.68516e4 1469.27693

\*\*\* End of Report \*\*\*

Data File E:\DATA\LP\LP20150827\LP20150827-1 2015-08-27 09-19-37\001-0201.D  
Sample Name: LP-1-H 3-CL RAC

```
=====
Acq. Operator   : SYSTEM                      Seq. Line :    2
Acq. Instrument : 1260HPLC-DAD                Location  : Vial 1
Injection Date  : 8/27/2015 9:34:46 AM         Inj       :    1
                                           Inj Volume: 5.000 µl
Acq. Method     : E:\DATA\LP\LP20150827\LP20150827-1 2015-08-27 09-19-37\DAD-AD(1-2)-90-10
                  -1.0ML-210-254-30MIN.M
Last changed    : 8/27/2015 9:19:37 AM by SYSTEM
Analysis Method : E:\DATA\LP\LP20150827\LP20150827-1 2015-08-27 09-19-37\DAD-AD(1-2)-90-10
                  -1.0ML-210-254-30MIN.M (Sequence Method)
Last changed    : 12/6/2015 7:56:37 PM by SYSTEM
                  (modified after loading)
Additional Info : Peak(s) manually integrated
=====
```

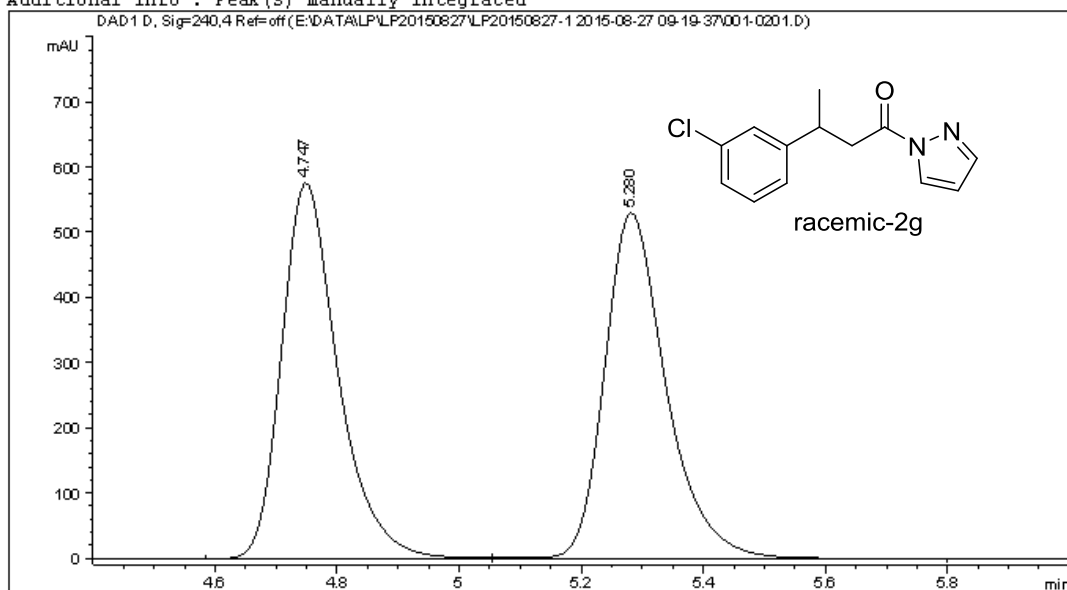

=====  
Area Percent Report  
=====

Sorted By : Signal  
Multiplier : 1.0000  
Dilution : 1.0000  
Do not use Multiplier & Dilution Factor with ISTDs

Signal 1: DAD1 D, Sig=240,4 Ref=off

| Peak # | RetTime [min] | Type | Width [min] | Area [mAU*s] | Height [mAU] | Area %  |
|--------|---------------|------|-------------|--------------|--------------|---------|
| 1      | 4.747         | BV   | 0.0967      | 3696.48535   | 577.36884    | 49.9205 |
| 2      | 5.280         | VB   | 0.1055      | 3708.26611   | 531.09973    | 50.0795 |

Totals : 7404.75146 1108.46857

=====  
\*\*\* End of Report \*\*\*



Data File E:\DATA\LP\LP-1-H\2-CL 3-CL 2015-11-09 09-30-55\012-0501.D  
Sample Name: LP-1-H 3-CL

```
=====
Acq. Operator   : SYSTEM                      Seq. Line :    5
Acq. Instrument : 1260HPLC-VWD                Location  : Vial 12
Injection Date  : 11/9/2015 11:55:55 AM        Inj       :    1
                                           Inj Volume: 5.000 µl
Acq. Method     : E:\DATA\LP\LP-1-H\2-CL 3-CL 2015-11-09 09-30-55\VWD-AD(1-2)-90-10-1ML-
                  240NM-60MIN.M
Last changed    : 11/9/2015 9:30:55 AM by SYSTEM
Analysis Method : E:\DATA\LP\LP-1-H\2-CL 3-CL 2015-11-09 09-30-55\VWD-AD(1-2)-90-10-1ML-
                  240NM-60MIN.M (Sequence Method)
Last changed    : 12/6/2015 8:00:19 PM by SYSTEM
                  (modified after loading)
Additional Info : Peak(s) manually integrated
=====
```

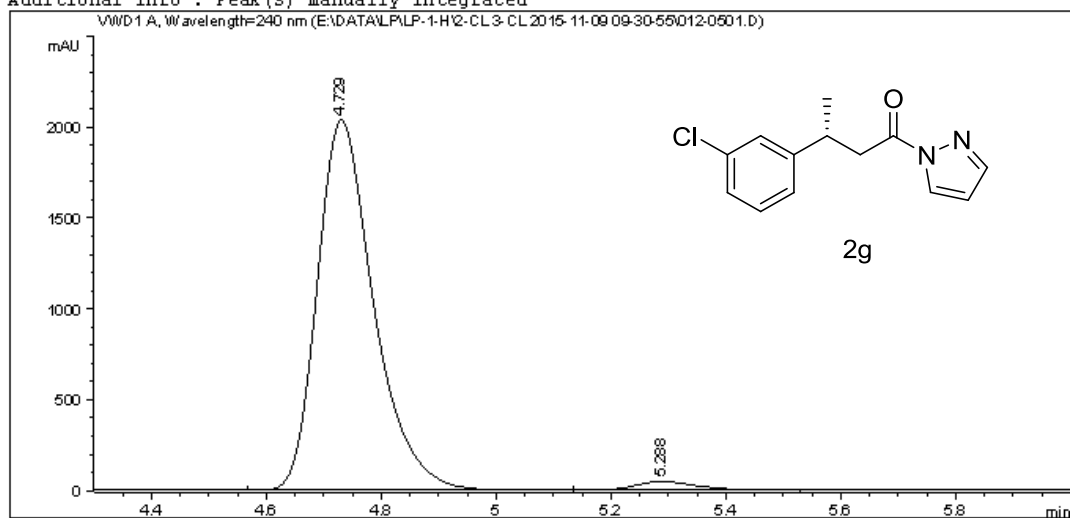

Area Percent Report

```
Sorted By      : Signal
Multiplier     : 1.0000
Dilution       : 1.0000
Do not use Multiplier & Dilution Factor with ISTDs
```

Signal 1: VWD1 A, Wavelength=240 nm

| Peak # | RetTime [min] | Type | Width [min] | Area [mAU*s] | Height [mAU] | Area %  |
|--------|---------------|------|-------------|--------------|--------------|---------|
| 1      | 4.729         | BV   | 0.1035      | 1.38982e4    | 2039.50220   | 97.4617 |
| 2      | 5.288         | VV   | 0.1132      | 361.95911    | 48.44436     | 2.5383  |

Totals : 1.42601e4 2087.94656

\*\*\* End of Report \*\*\*

Data File E:\DATA\LP\LP-1-H\F 11-17-2 2015-11-17 14-56-59\001-0201.D  
Sample Name: LP-1-H -F RAC

```
=====
Acq. Operator   : SYSTEM                      Seq. Line :    2
Acq. Instrument : 1260HPLC-DAD                Location  : Vial 1
Injection Date  : 11/17/2015 3:09:06 PM        Inj       :    1
                                           Inj Volume: 5.000 µl
Acq. Method     : E:\DATA\LP\LP-1-H\F 11-17-2 2015-11-17 14-56-59\DAD-0J (1-6)-98-2-0.6ML-
                  210-254-60MIN.M
Last changed    : 11/17/2015 2:57:00 PM by SYSTEM
Analysis Method : E:\DATA\LP\LP-1-H\F 11-17-2 2015-11-17 14-56-59\DAD-0J (1-6)-98-2-0.6ML-
                  210-254-60MIN.M (Sequence Method)
Last changed    : 12/6/2015 4:46:42 PM by SYSTEM
                  (modified after loading)
Additional Info : Peak(s) manually integrated
=====
```

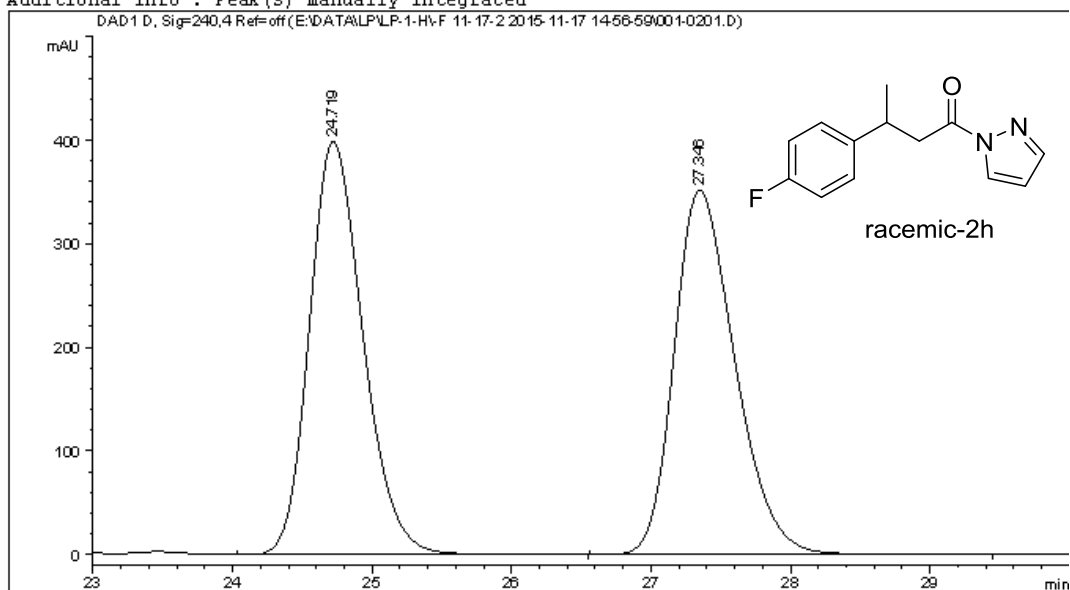

=====  
Area Percent Report  
=====

Sorted By : Signal  
Multiplier : 1.0000  
Dilution : 1.0000  
Do not use Multiplier & Dilution Factor with ISTDs

Signal 1: DAD1 D, Sig=240,4 Ref=off

| Peak # | RetTime [min] | Type | Width [min] | Area [mAU*s] | Height [mAU] | Area %  |
|--------|---------------|------|-------------|--------------|--------------|---------|
| 1      | 24.719        | BB   | 0.4111      | 1.06488e4    | 399.34598    | 49.9749 |
| 2      | 27.346        | BB   | 0.4653      | 1.06595e4    | 352.01514    | 50.0251 |

Totals : 2.13084e4 751.36111

=====  
\*\*\* End of Report \*\*\*

Data File E:\DATA\LP\LP-1-H\F 11-17-2 2015-11-17 14-56-59\002-0301.D  
Sample Name: LP-1-H -F

```

=====
Acq. Operator   : SYSTEM                      Seq. Line :    3
Acq. Instrument : 1260HPLC-DAD                Location  : Vial 2
Injection Date  : 11/17/2015 4:10:11 PM       Inj       :    1
                                           Inj Volume: 5.000 µl
Acq. Method     : E:\DATA\LP\LP-1-H\F 11-17-2 2015-11-17 14-56-59\DAD-0J (1-6)-98-2-0.6ML-
210-254-60MIN.M
Last changed    : 11/17/2015 2:57:00 PM by SYSTEM
Analysis Method : E:\DATA\LP\LP-1-H\F 11-17-2 2015-11-17 14-56-59\DAD-0J (1-6)-98-2-0.6ML-
210-254-60MIN.M (Sequence Method)
Last changed    : 12/6/2015 5:09:50 PM by SYSTEM
                (modified after loading)
Additional Info : Peak(s) manually integrated
=====

```

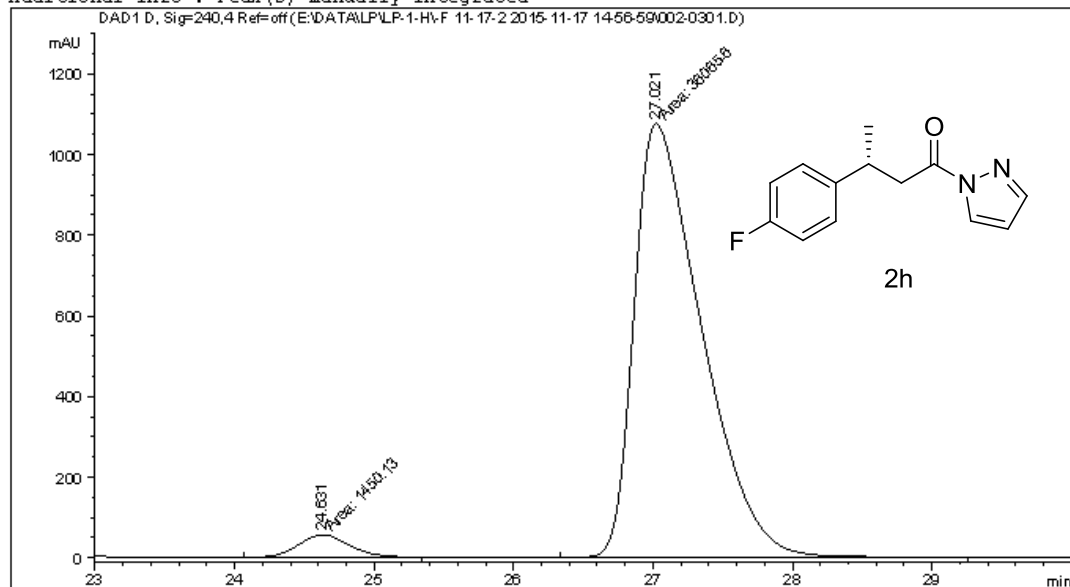

# Area Percent Report

```

=====
Sorted By      :      Signal
Multiplier     :      1.0000
Dilution       :      1.0000
Do not use Multiplier & Dilution Factor with ISTDs

```

Signal 1: DAD1 D, Sig=240,4 Ref=off

| Peak # | RetTime [min] | Type | Width [min] | Area [mAU*s] | Height [mAU] | Area %  |
|--------|---------------|------|-------------|--------------|--------------|---------|
| 1      | 24.631        | MM   | 0.4329      | 1450.13452   | 55.82598     | 3.8654  |
| 2      | 27.021        | MM   | 0.5586      | 3.60656e4    | 1076.16211   | 96.1346 |

Totals : 3.75157e4 1131.98809

\*\*\* End of Report \*\*\*

Data File E:\DATA\LP\LP-1-H\LP-1-H -F 2015-12-06 18-35-41\012-0501.D  
Sample Name: LP-1-H -iPr RAC

```
=====
Acq. Operator   : SYSTEM                      Seq. Line :    5
Acq. Instrument : 1260HPLC-DAD                Location  : Vial 12
Injection Date  : 12/6/2015 7:37:25 PM        Inj       :    1
                                           Inj Volume: 5.000 µl
Acq. Method     : E:\DATA\LP\LP-1-H\LP-1-H -F 2015-12-06 18-35-41\DAD-0J(1-6)-95-0.6ML-
                  ALLNM-60MIN2015-3.M
Last changed    : 12/6/2015 7:34:52 PM by SYSTEM
Analysis Method : E:\DATA\LP\LP-1-H\LP-1-H -F 2015-12-06 18-35-41\DAD-0J(1-6)-95-0.6ML-
                  ALLNM-60MIN2015-3.M (Sequence Method)
Last changed    : 12/6/2015 8:03:25 PM by SYSTEM
                  (modified after loading)
Additional Info : Peak(s) manually integrated
=====
```

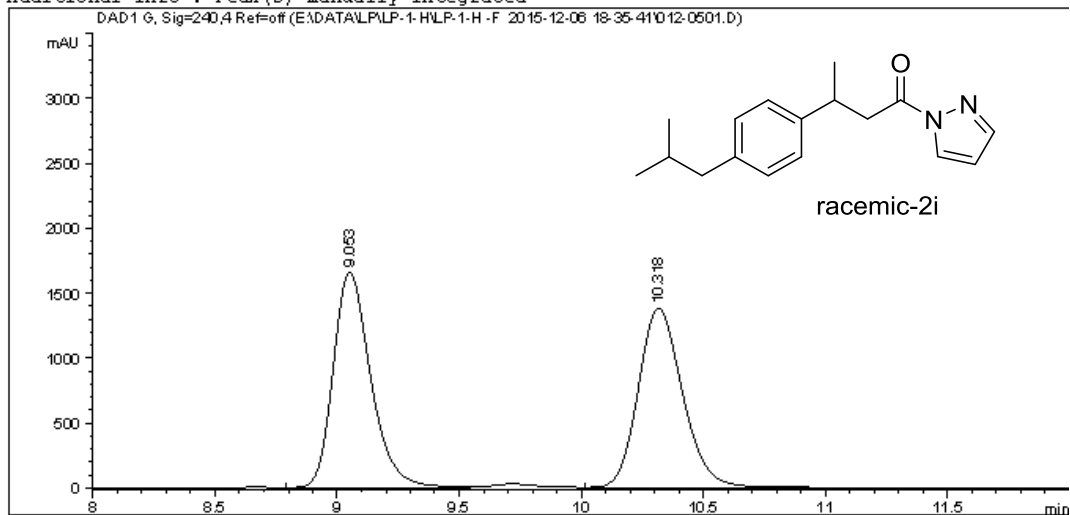

Area Percent Report

```
Sorted By      :      Signal
Multiplier     :      1.0000
Dilution       :      1.0000
Do not use Multiplier & Dilution Factor with ISTDs
```

Signal 1: DAD1 G, Sig=240,4 Ref=off

| Peak # | RetTime [min] | Type | Width [min] | Area [mAU*s] | Height [mAU] | Area %  |
|--------|---------------|------|-------------|--------------|--------------|---------|
| 1      | 9.053         | VV   | 0.1644      | 1.77368e4    | 1663.09924   | 50.3450 |
| 2      | 10.318        | VB   | 0.1956      | 1.74937e4    | 1382.44446   | 49.6550 |

Totals : 3.52306e4 3045.54370

\*\*\* End of Report \*\*\*

Data File E:\DATA\LP\LP-1-H\LP-1-H -F 2015-12-06 18-35-41\011-0401.D  
Sample Name: lp-1-h -ipr

```
=====
Acq. Operator   : SYSTEM                      Seq. Line :    4
Acq. Instrument : 1260HPLC-DAD                Location  : Vial 11
Injection Date  : 12/6/2015 7:21:30 PM        Inj       :    1
                                           Inj Volume: 5.000 µl
Acq. Method     : E:\DATA\LP\LP-1-H\LP-1-H -F 2015-12-06 18-35-41\DAD-0J(1-6)-95-0.6ML-
                  ALLNM-60MIN2015-3.M
Last changed    : 12/6/2015 7:34:52 PM by SYSTEM
                  (modified after loading)
Analysis Method : E:\DATA\LP\LP-1-H\LP-1-H -F 2015-12-06 18-35-41\DAD-0J(1-6)-95-0.6ML-
                  ALLNM-60MIN2015-3.M (Sequence Method)
Last changed    : 6/14/2016 9:26:40 AM by SYSTEM
                  (modified after loading)
Additional Info : Peak(s) manually integrated
=====
```

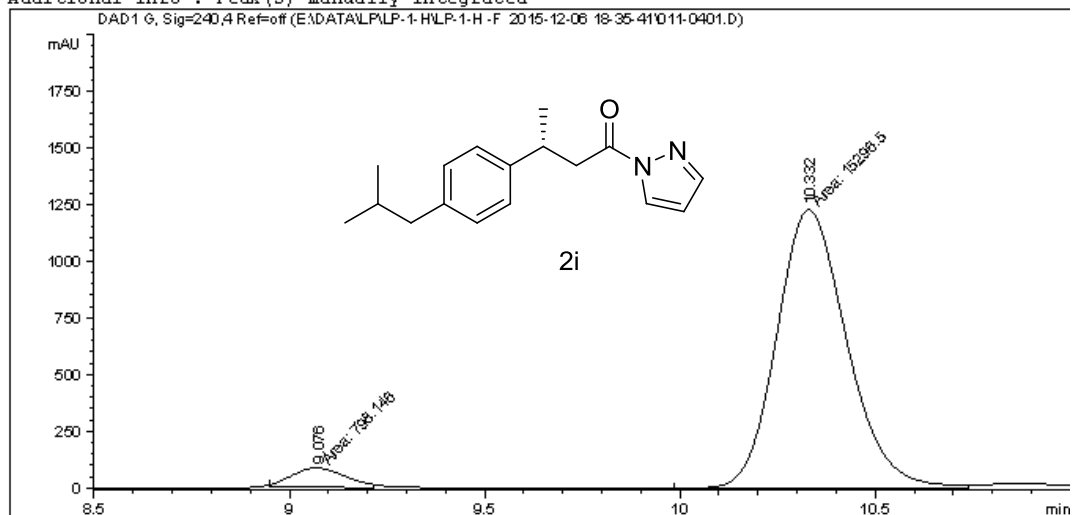

=====  
Area Percent Report  
=====

Sorted By : Signal  
Multiplier : 1.0000  
Dilution : 1.0000  
Do not use Multiplier & Dilution Factor with ISTDs

Signal 1: DAD1 G, Sig=240,4 Ref=off

| Peak # | RetTime [min] | Type | Width [min] | Area [mAU*s] | Height [mAU] | Area %  |
|--------|---------------|------|-------------|--------------|--------------|---------|
| 1      | 9.076         | MM   | 0.1588      | 798.14618    | 83.74681     | 4.9591  |
| 2      | 10.332        | MF   | 0.2077      | 1.52965e4    | 1227.36108   | 95.0409 |

Totals : 1.60946e4 1311.10789

=====  
\*\*\* End of Report \*\*\*

Data File E:\DATA\LP\LP-2-H\20151207-3 2015-12-07 13-39-17\031-0801.D  
Sample Name: LP-2-H ADD 2-CH3 RAC

```
=====
Acq. Operator   : SYSTEM                      Seq. Line :    8
Acq. Instrument : 1260HPLC-DAD                Location  : Vial 31
Injection Date  : 12/7/2015 5:28:07 PM         Inj       :    1
                                           Inj Volume: 5.000 µl
Acq. Method     : E:\DATA\LP\LP-2-H\20151207-3 2015-12-07 13-39-17\DAD-0J (1-6)-98-2-1.OML-
                  210-254-60MIN.M
Last changed    : 12/7/2015 1:39:18 PM by SYSTEM
Analysis Method : E:\DATA\LP\LP-2-H\20151207-3 2015-12-07 13-39-17\DAD-0J (1-6)-98-2-1.OML-
                  210-254-60MIN.M (Sequence Method)
Last changed    : 5/16/2016 9:23:09 AM by SYSTEM
                  (modified after loading)
Additional Info : Peak(s) manually integrated
=====
```

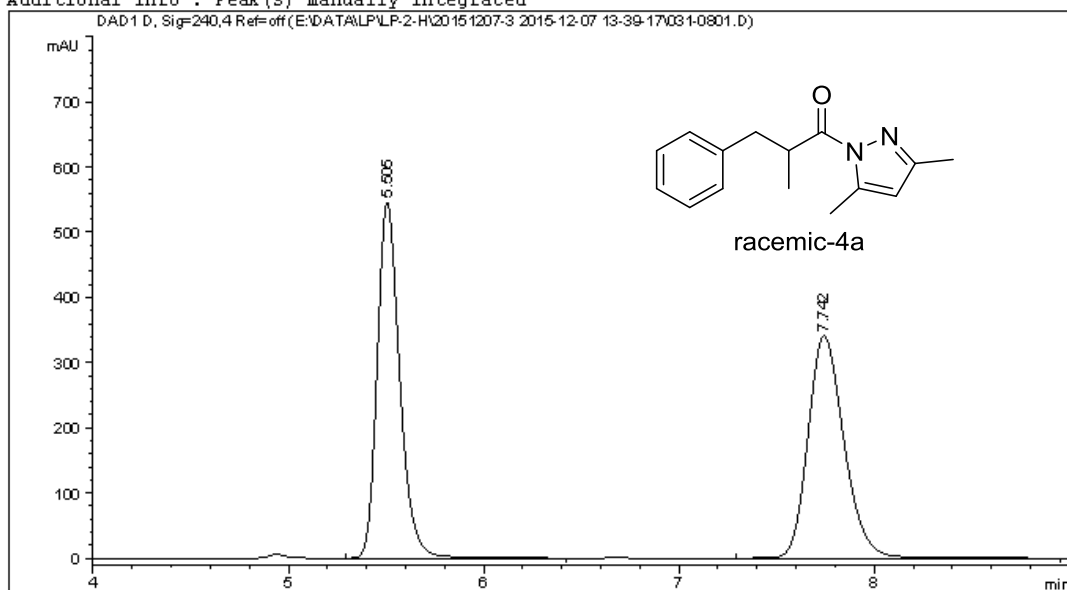

=====  
Area Percent Report  
=====

Sorted By : Signal  
Multiplier : 1.0000  
Dilution : 1.0000  
Do not use Multiplier & Dilution Factor with ISTDs

Signal 1: DAD1 D, Sig=240,4 Ref=off

| Peak # | RetTime [min] | Type | Width [min] | Area [mAU*s] | Height [mAU] | Area %  |
|--------|---------------|------|-------------|--------------|--------------|---------|
| 1      | 5.505         | BB   | 0.1229      | 4351.47852   | 546.41278    | 49.8943 |
| 2      | 7.742         | BB   | 0.1976      | 4369.91992   | 340.75269    | 50.1057 |

Totals : 8721.39844 887.16547

=====  
\*\*\* End of Report \*\*\*

Data File E:\DATA\LP\LP20160511\LP20160511-1 2016-05-11 09-18-40\031-0201.D  
Sample Name: LP-2-H sample

```
=====
Acq. Operator   : SYSTEM                      Seq. Line :    2
Acq. Instrument : 1260HPLC-VWD                Location  : Vial 31
Injection Date  : 5/11/2016 9:32:03 AM        Inj       :    1
                                           Inj Volume: 5.000 µl
Acq. Method     : E:\DATA\LP\LP20160511\LP20160511-1 2016-05-11 09-18-40\VWD-0J(1-6)-98-2-
                  1ML-5U-240ALL 30MIN.M
Last changed    : 5/11/2016 9:42:26 AM by SYSTEM
                  (modified after loading)
Analysis Method : E:\DATA\LP\LP20160511\LP20160511-1 2016-05-11 09-18-40\VWD-0J(1-6)-98-2-
                  1ML-5U-240ALL 30MIN.M (Sequence Method)
Last changed    : 5/16/2016 9:40:11 AM by SYSTEM
                  (modified after loading)
Additional Info : Peak(s) manually integrated
=====
```

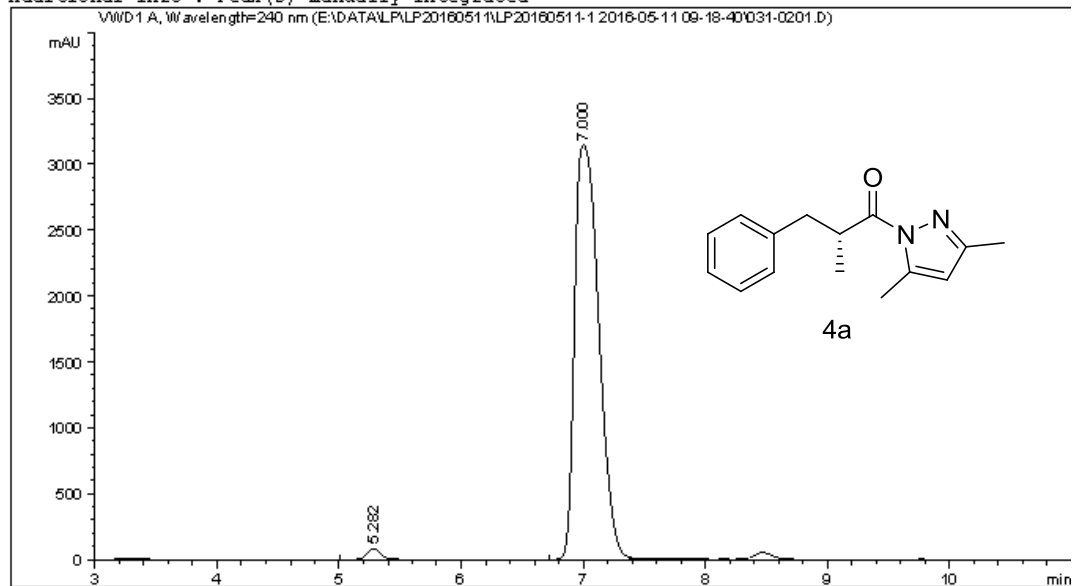

Area Percent Report

```
Sorted By      : Signal
Multiplier     : 1.0000
Dilution       : 1.0000
Do not use Multiplier & Dilution Factor with ISTDs
```

Signal 1: VWD1 A, Wavelength=240 nm

| Peak # | RetTime [min] | Type | Width [min] | Area [mAU*s] | Height [mAU] | Area %  |
|--------|---------------|------|-------------|--------------|--------------|---------|
| 1      | 5.282         | BB   | 0.1147      | 622.92249    | 83.83946     | 1.4178  |
| 2      | 7.000         | BB   | 0.2176      | 4.33120e4    | 3145.68481   | 98.5822 |

Totals : 4.39349e4 3229.52428

Data File E:\DATA\LP\LP-3-15\LP20160118-2 2016-01-18 14-31-28\021-0201.D  
Sample Name: 3-CH3

```
=====
Acq. Operator   : SYSTEM                      Seq. Line :    2
Acq. Instrument : 1260HPLC-DAD                Location  : Vial 21
Injection Date  : 1/18/2016 2:44:02 PM        Inj       :    1
                                           Inj Volume: 5.000 µl
Acq. Method     : E:\DATA\LP\LP-3-15\LP20160118-2 2016-01-18 14-31-28\DAD-0J(1-2)-98-2-1-
                  ALLUM-30MIN.M
Last changed    : 1/18/2016 2:31:28 PM by SYSTEM
Analysis Method : E:\DATA\LP\LP-3-15\LP20160118-2 2016-01-18 14-31-28\DAD-0J(1-2)-98-2-1-
                  ALLUM-30MIN.M (Sequence Method)
Last changed    : 1/25/2016 3:12:06 PM by SYSTEM
                  (modified after loading)
Additional Info : Peak(s) manually integrated
=====
```

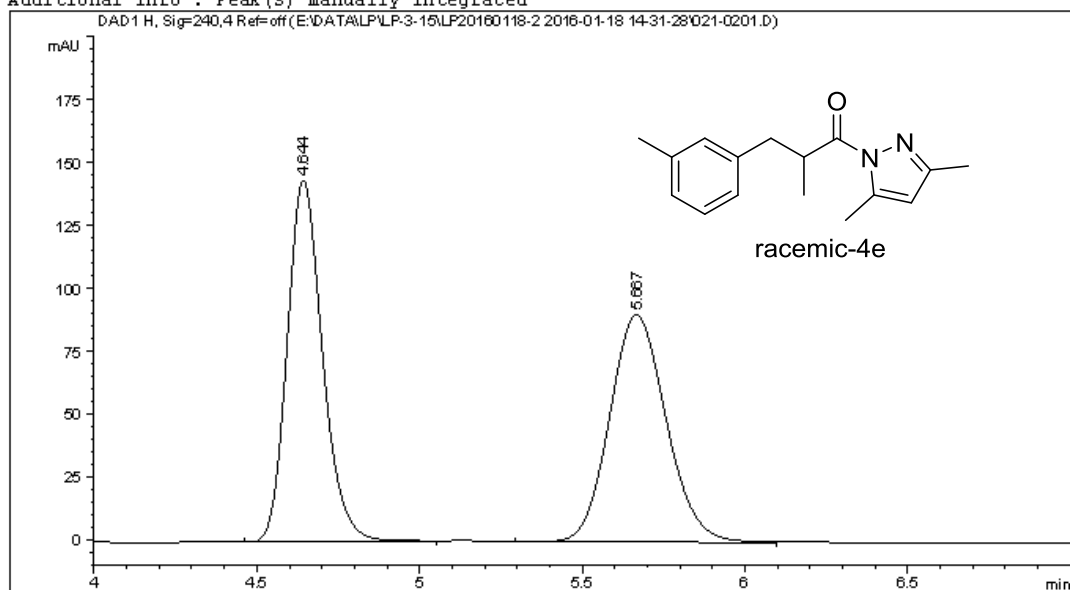

=====  
Area Percent Report  
=====

Sorted By : Signal  
Multiplier : 1.0000  
Dilution : 1.0000  
Do not use Multiplier & Dilution Factor with ISTDs

Signal 1: DAD1 H, Sig=240,4 Ref=off

| Peak # | RetTime [min] | Type | Width [min] | Area [mAU*s] | Height [mAU] | Area %  |
|--------|---------------|------|-------------|--------------|--------------|---------|
| 1      | 4.644         | BB   | 0.1159      | 1084.44165   | 144.01190    | 49.8970 |
| 2      | 5.667         | BV   | 0.1865      | 1088.91895   | 90.42944     | 50.1030 |

Totals : 2173.36060 234.44134

=====  
\*\*\* End of Report \*\*\*



Data File E:\DATA\LP\LP-3-15\LP20160118-2 2016-01-18 14-31-28\031-0501.D  
Sample Name: 3-ch3

```
=====
Acq. Operator   : SYSTEM                      Seq. Line :    5
Acq. Instrument : 1260HPLC-DAD                Location  : Vial 31
Injection Date  : 1/18/2016 4:10:45 PM        Inj       :    1
                                           Inj Volume: 5.000 µl

Acq. Method     : E:\DATA\LP\LP-3-15\LP20160118-2 2016-01-18 14-31-28\
ALLUM-30MIN.M
Last changed    : 1/18/2016 4:09:51 PM by SYSTEM
Analysis Method : E:\DATA\LP\LP-3-15\LP20160118-2 2016-01-18 14-31-28\
ALLUM-30MIN.M (Sequence Method)
Last changed    : 1/25/2016 7:54:44 PM by SYSTEM
                (modified after loading)
Additional Info : Peak(s) manually integrated
=====
```

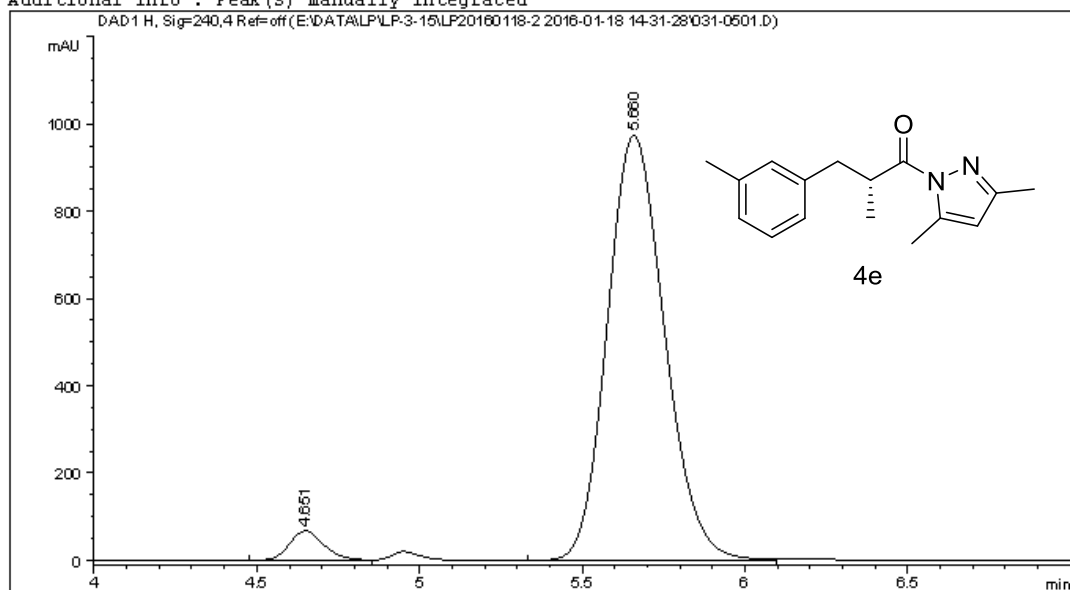

# Area Percent Report

```
Sorted By      :      Signal
Multiplier     :      1.0000
Dilution       :      1.0000
Do not use Multiplier & Dilution Factor with ISTDs
```

Signal 1: DAD1 H, Sig=240,4 Ref=off

| Peak # | RetTime [min] | Type | Width [min] | Area [mAU*s] | Height [mAU] | Area %  |
|--------|---------------|------|-------------|--------------|--------------|---------|
| 1      | 4.651         | VV   | 0.1149      | 503.57791    | 67.63942     | 4.0564  |
| 2      | 5.660         | BV   | 0.1886      | 1.19109e4    | 974.44037    | 95.9436 |

Totals : 1.24145e4 1042.07979

\*\*\* End of Report \*\*\*

Data File E:\DATA\LP\LP-3-2\LP-3-2 2015-12-22 16-09-31\031-0201.D  
Sample Name: -CH3 RAC

```
=====
Acq. Operator   : SYSTEM                      Seq. Line :    2
Acq. Instrument : 1260HPLC-DAD                Location  : Vial 31
Injection Date  : 12/22/2015 4:22:08 PM       Inj       :    1
                                           Inj Volume: 5.000 µl
Acq. Method     : E:\DATA\LP\LP-3-2\LP-3-2 2015-12-22 16-09-31\DAD-0J(1-6)-98-2-1.OML-210-
254-30MIN.M
Last changed    : 12/22/2015 4:42:56 PM by SYSTEM
                  (modified after loading)
Analysis Method : E:\DATA\LP\LP-3-2\LP-3-2 2015-12-22 16-09-31\DAD-0J(1-6)-98-2-1.OML-210-
254-30MIN.M (Sequence Method)
Last changed    : 1/25/2016 8:01:35 PM by SYSTEM
                  (modified after loading)
Additional Info : Peak(s) manually integrated
=====
```

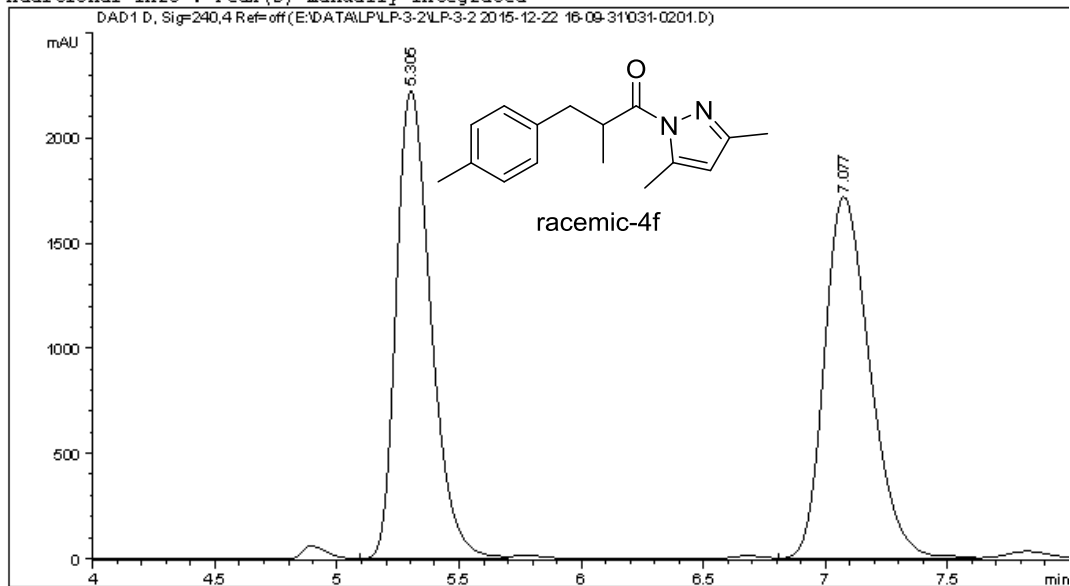

Area Percent Report

```
Sorted By      :      Signal
Multiplier     :      1.0000
Dilution       :      1.0000
Do not use Multiplier & Dilution Factor with ISTDs
```

Signal 1: DAD1 D, Sig=240,4 Ref=off

| Peak # | RetTime [min] | Type | Width [min] | Area [mAU*s] | Height [mAU] | Area %  |
|--------|---------------|------|-------------|--------------|--------------|---------|
| 1      | 5.305         | BV   | 0.1528      | 2.18940e4    | 2224.44580   | 49.4421 |
| 2      | 7.077         | VV   | 0.2018      | 2.23880e4    | 1721.14331   | 50.5579 |

Totals : 4.42820e4 3945.58911

Data File E:\DATA\LP\LP-3-15\LP20160118-2 2016-01-18 14-31-28\041-0801.D  
Sample Name: -CH3(2)

```
=====
Acq. Operator   : SYSTEM                      Seq. Line :    8
Acq. Instrument : 1260HPLC-DAD                Location  : Vial 41
Injection Date  : 1/18/2016 4:58:27 PM        Inj       :    1
                                           Inj Volume: 5.000 µl
Acq. Method     : E:\DATA\LP\LP-3-15\LP20160118-2 2016-01-18 14-31-28\
DAD-0J(1-2)-98-2-1-ALLUM-30MIN.M
Last changed    : 1/18/2016 4:09:51 PM by SYSTEM
Analysis Method : E:\DATA\LP\LP-3-15\LP20160118-2 2016-01-18 14-31-28\
DAD-0J(1-2)-98-2-1-ALLUM-30MIN.M (Sequence Method)
Last changed    : 1/25/2016 8:16:05 PM by SYSTEM
                (modified after loading)
Additional Info : Peak(s) manually integrated
=====
```

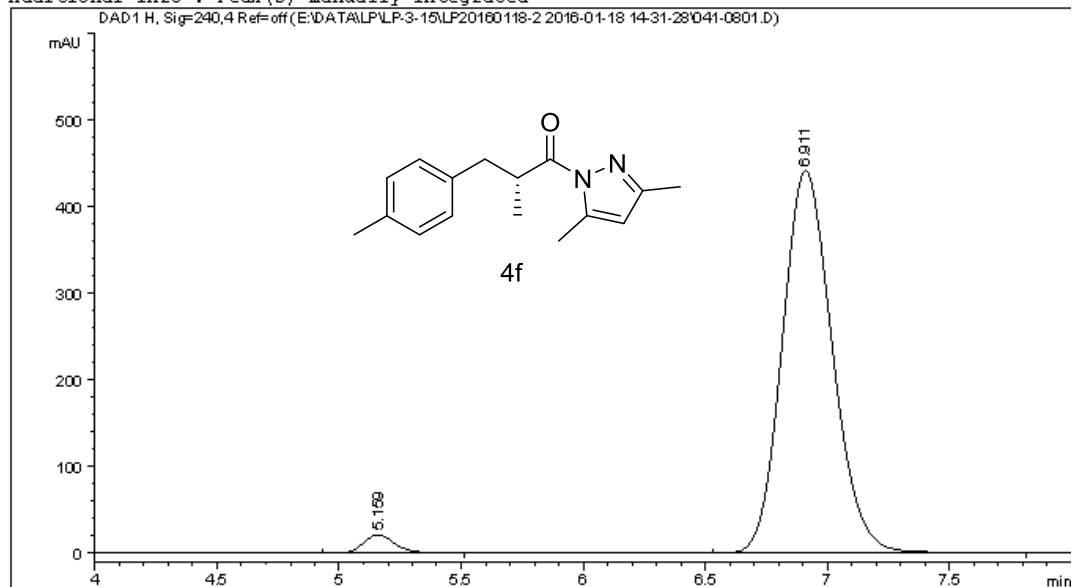

=====  
Area Percent Report  
=====

Sorted By : Signal  
Multiplier : 1.0000  
Dilution : 1.0000  
Do not use Multiplier & Dilution Factor with ISTDs

Signal 1: DAD1 H, Sig=240,4 Ref=off

| Peak # | RetTime [min] | Type | Width [min] | Area [mAU*s] | Height [mAU] | Area %  |
|--------|---------------|------|-------------|--------------|--------------|---------|
| 1      | 5.159         | BB   | 0.1362      | 187.58426    | 20.99443     | 2.8964  |
| 2      | 6.911         | BB   | 0.2221      | 6288.79346   | 441.78464    | 97.1036 |

Totals : 6476.37772 462.77907

=====  
\*\*\* End of Report \*\*\*

Data File E:\DATA\LP\LP-3-15\LP20160118-2 2016-01-18 14-31-28\022-0301.D  
Sample Name: 3-0CH3

```
=====
Acq. Operator   : SYSTEM                      Seq. Line :    3
Acq. Instrument : 1260HPLC-DAD                Location  : Vial 22
Injection Date  : 1/18/2016 3:14:55 PM        Inj       :    1
                                           Inj Volume: 5.000 µl
Acq. Method     : E:\DATA\LP\LP-3-15\LP20160118-2 2016-01-18 14-31-28\DAD-0J(1-2)-98-2-1-
                  ALLUM-30MIN.M
Last changed    : 1/18/2016 2:31:28 PM by SYSTEM
Analysis Method : E:\DATA\LP\LP-3-15\LP20160118-2 2016-01-18 14-31-28\DAD-0J(1-2)-98-2-1-
                  ALLUM-30MIN.M (Sequence Method)
Last changed    : 1/25/2016 7:49:26 PM by SYSTEM
                  (modified after loading)
Additional Info : Peak(s) manually integrated
=====
```

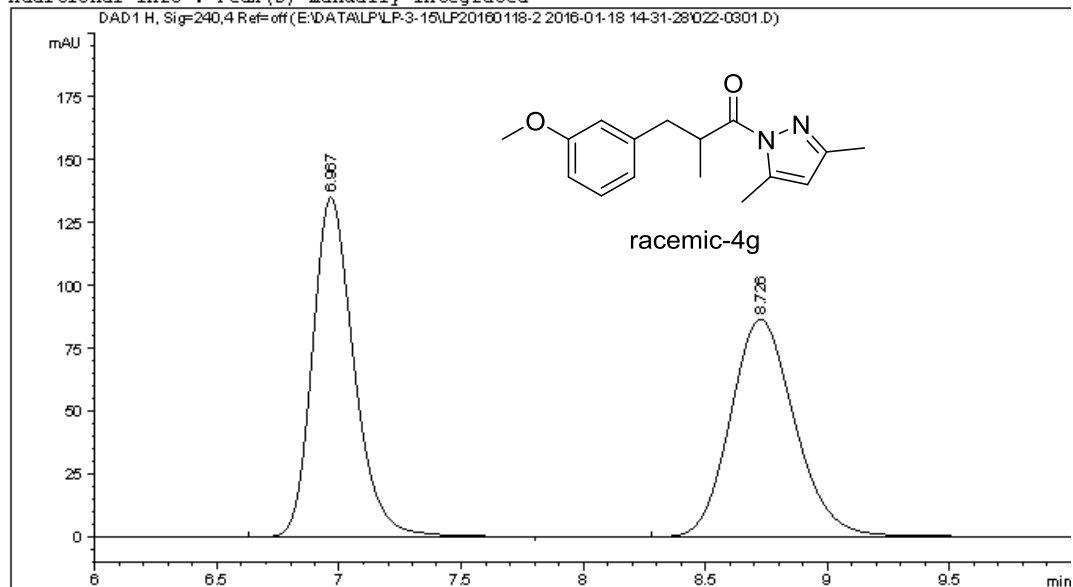

=====  
Area Percent Report  
=====

Sorted By : Signal  
Multiplier : 1.0000  
Dilution : 1.0000  
Do not use Multiplier & Dilution Factor with ISTDs

Signal 1: DAD1 H, Sig=240,4 Ref=off

| Peak # | RetTime [min] | Type | Width [min] | Area [mAU*s] | Height [mAU] | Area %  |
|--------|---------------|------|-------------|--------------|--------------|---------|
| 1      | 6.967         | BB   | 0.1790      | 1586.65857   | 135.13722    | 50.0449 |
| 2      | 8.726         | BB   | 0.2815      | 1583.81018   | 86.55563     | 49.9551 |

Totals : 3170.46875 221.69286

=====  
\*\*\* End of Report \*\*\*

Data File E:\DATA\LP\LP-3-15\LP20160118-2 2016-01-18 14-31-28\032-0601.D  
Sample Name: 3-och3

```
=====
Acq. Operator   : SYSTEM                      Seq. Line :    6
Acq. Instrument : 1260HPLC-DAD                Location  : Vial 32
Injection Date  : 1/18/2016 4:26:40 PM        Inj       :    1
                                           Inj Volume: 5.000 µl
Acq. Method     : E:\DATA\LP\LP-3-15\LP20160118-2 2016-01-18 14-31-28\
ALLUM-30MIN.M
Last changed    : 1/18/2016 4:09:51 PM by SYSTEM
Analysis Method : E:\DATA\LP\LP-3-15\LP20160118-2 2016-01-18 14-31-28\
ALLUM-30MIN.M (Sequence Method)
Last changed    : 1/25/2016 7:56:18 PM by SYSTEM
                (modified after loading)
Additional Info : Peak(s) manually integrated
=====
```

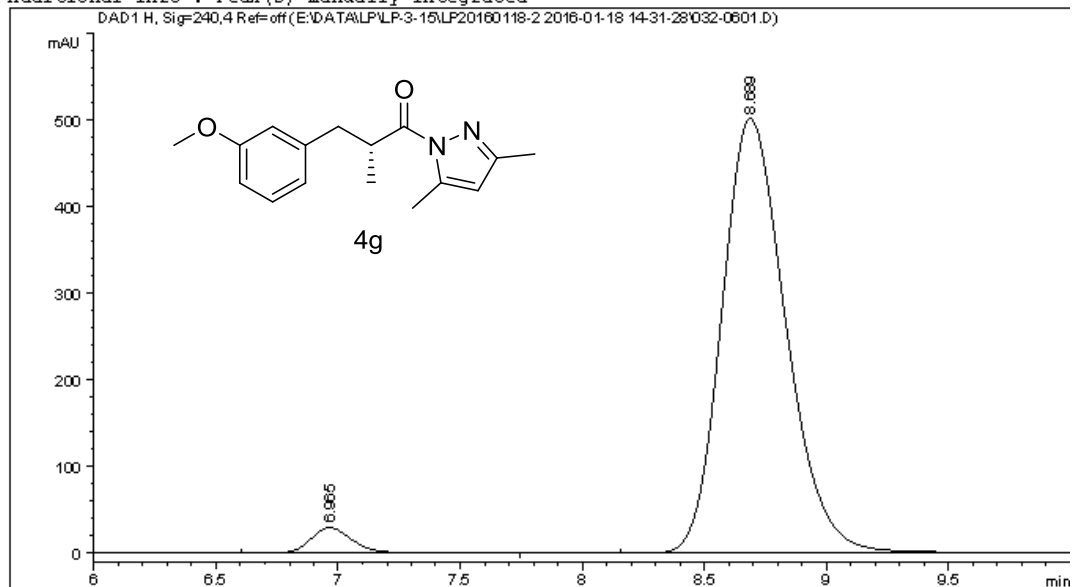

=====  
Area Percent Report  
=====

Sorted By : Signal  
Multiplier : 1.0000  
Dilution : 1.0000  
Do not use Multiplier & Dilution Factor with ISTDs

Signal 1: DAD1 H, Sig=240,4 Ref=off

| Peak # | RetTime [min] | Type | Width [min] | Area [mAU*s] | Height [mAU] | Area %  |
|--------|---------------|------|-------------|--------------|--------------|---------|
| 1      | 6.965         | BB   | 0.1833      | 352.72330    | 29.53148     | 3.7100  |
| 2      | 8.689         | BB   | 0.2808      | 9154.66211   | 501.85910    | 96.2900 |

Totals : 9507.38541 531.39058

=====  
\*\*\* End of Report \*\*\*

Data File E:\DATA\LP\LP-3-2\LP-3-2 2015-12-22 16-09-31\032-0301.D  
Sample Name: -OCH3 RAC

```
=====
Acq. Operator   : SYSTEM                      Seq. Line :    3
Acq. Instrument : 1260HPLC-DAD                Location  : Vial 32
Injection Date  : 12/22/2015 4:43:53 PM       Inj       :    1
                                           Inj Volume: 5.000 µl

Acq. Method     : E:\DATA\LP\LP-3-2\LP-3-2 2015-12-22 16-09-31\DAD-0J(1-6)-98-2-1.OML-210-
                  254-30MIN.M
Last changed    : 12/22/2015 4:43:10 PM by SYSTEM
                  (modified after loading)
Analysis Method : E:\DATA\LP\LP-3-2\LP-3-2 2015-12-22 16-09-31\DAD-0J(1-6)-98-2-1.OML-210-
                  254-30MIN.M (Sequence Method)
Last changed    : 1/25/2016 8:02:48 PM by SYSTEM
                  (modified after loading)
Additional Info  : Peak(s) manually integrated
=====
```

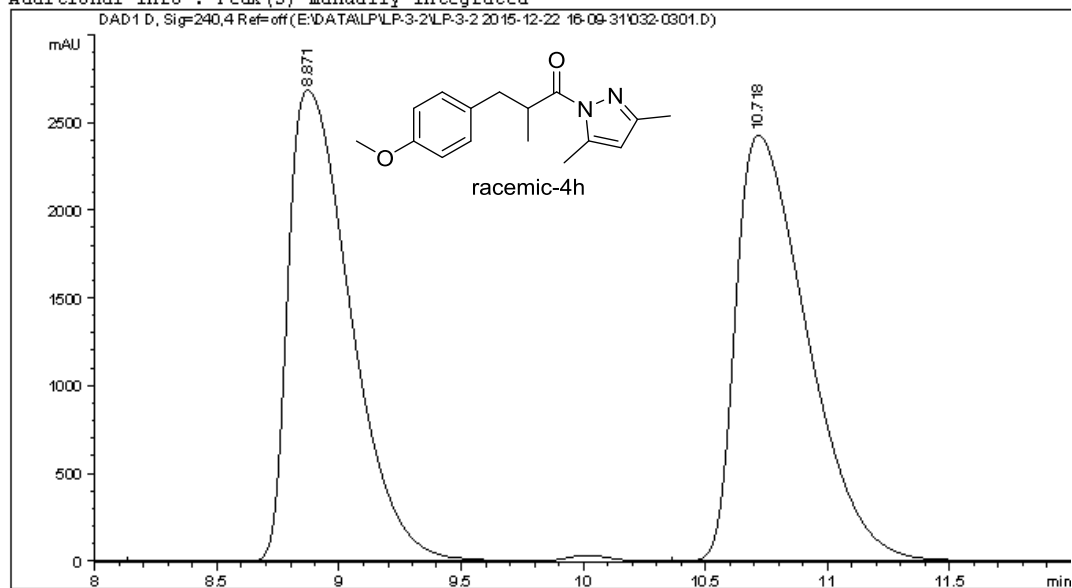

Area Percent Report

```
Sorted By      : Signal
Multiplier     : 1.0000
Dilution       : 1.0000
Do not use Multiplier & Dilution Factor with ISTDs
```

Signal 1: DAD1 D, Sig=240,4 Ref=off

| Peak # | RetTime [min] | Type | Width [min] | Area [mAU*s] | Height [mAU] | Area %  |
|--------|---------------|------|-------------|--------------|--------------|---------|
| 1      | 8.871         | BV   | 0.2750      | 4.75866e4    | 2682.58374   | 49.1126 |
| 2      | 10.718        | BB   | 0.3151      | 4.93063e4    | 2425.97192   | 50.8874 |

Totals : 9.68929e4 5108.55566

Data File E:\DATA\LP\LP-3-15\LP20160118-2 2016-01-18 14-31-28\042-0901.D  
Sample Name: -OCH3(2)

```
=====
Acq. Operator   : SYSTEM                      Seq. Line :    9
Acq. Instrument : 1260HPLC-DAD                Location  : Vial 42
Injection Date  : 1/18/2016 5:14:21 PM         Inj       :    1
                                           Inj Volume: 5.000 µl
Acq. Method     : E:\DATA\LP\LP-3-15\LP20160118-2 2016-01-18 14-31-28\DAD-0J(1-2)-98-2-1-
                  ALLUM-30MIN.M
Last changed    : 1/18/2016 4:09:51 PM by SYSTEM
Analysis Method : E:\DATA\LP\LP-3-15\LP20160118-2 2016-01-18 14-31-28\DAD-0J(1-2)-98-2-1-
                  ALLUM-30MIN.M (Sequence Method)
Last changed    : 1/25/2016 8:17:28 PM by SYSTEM
                  (modified after loading)
Additional Info : Peak(s) manually integrated
=====
```

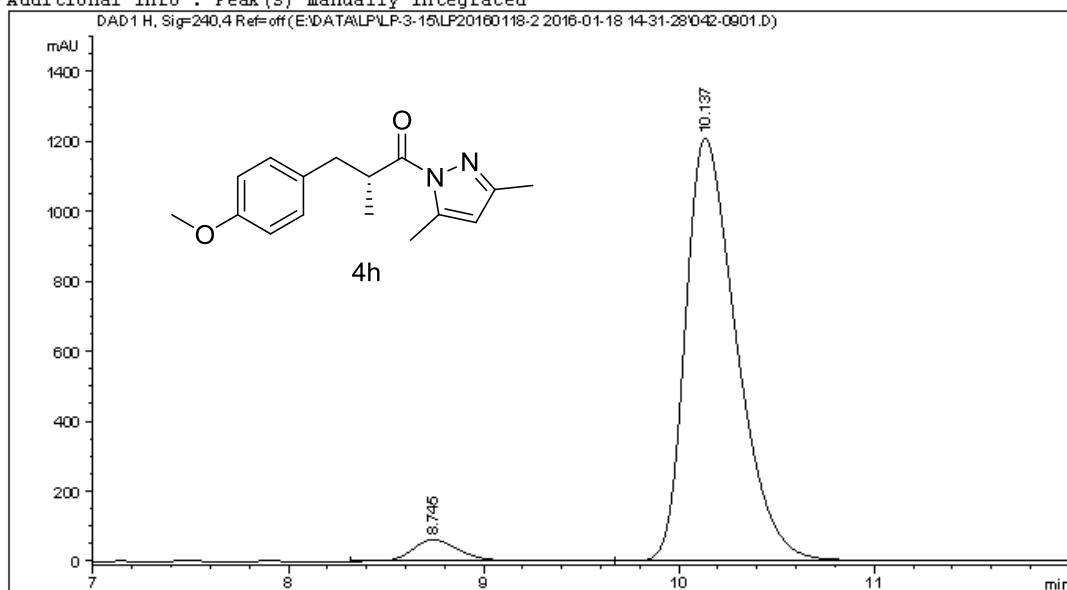

=====  
Area Percent Report  
=====

Sorted By : Signal  
Multiplier : 1.0000  
Dilution : 1.0000  
Do not use Multiplier & Dilution Factor with ISTDs

Signal 1: DAD1 H, Sig=240,4 Ref=off

| Peak # | RetTime [min] | Type | Width [min] | Area [mAU*s] | Height [mAU] | Area %  |
|--------|---------------|------|-------------|--------------|--------------|---------|
| 1      | 8.745         | BB   | 0.2542      | 1022.45892   | 61.41182     | 4.4457  |
| 2      | 10.137        | BB   | 0.2780      | 2.19764e4    | 1209.36194   | 95.5543 |

Totals : 2.29989e4 1270.77375

=====  
\*\*\* End of Report \*\*\*

Data File E:\DATA\LP\LP-3-13\F RAC-3 2016-01-09 20-03-32\011-0201.D  
Sample Name: -F RAC

```
=====
Acq. Operator   : SYSTEM                      Seq. Line :    2
Acq. Instrument : 1260HPLC-VWD                Location  : Vial 11
Injection Date  : 1/9/2016 8:16:02 PM          Inj       :    1
                                           Inj Volume: 5.000 µl
Acq. Method     : E:\DATA\LP\LP-3-13\F RAC-3 2016-01-09 20-03-32\VWD-AD(1-2)-99-1-IML-
                  240NM-60MIN.M
Last changed    : 1/9/2016 8:27:16 PM by SYSTEM
                  (modified after loading)
Analysis Method : E:\DATA\LP\LP-3-13\F RAC-3 2016-01-09 20-03-32\VWD-AD(1-2)-99-1-IML-
                  240NM-60MIN.M (Sequence Method)
Last changed    : 5/25/2016 4:18:53 PM by SYSTEM
                  (modified after loading)
Additional Info : Peak(s) manually integrated
=====
```

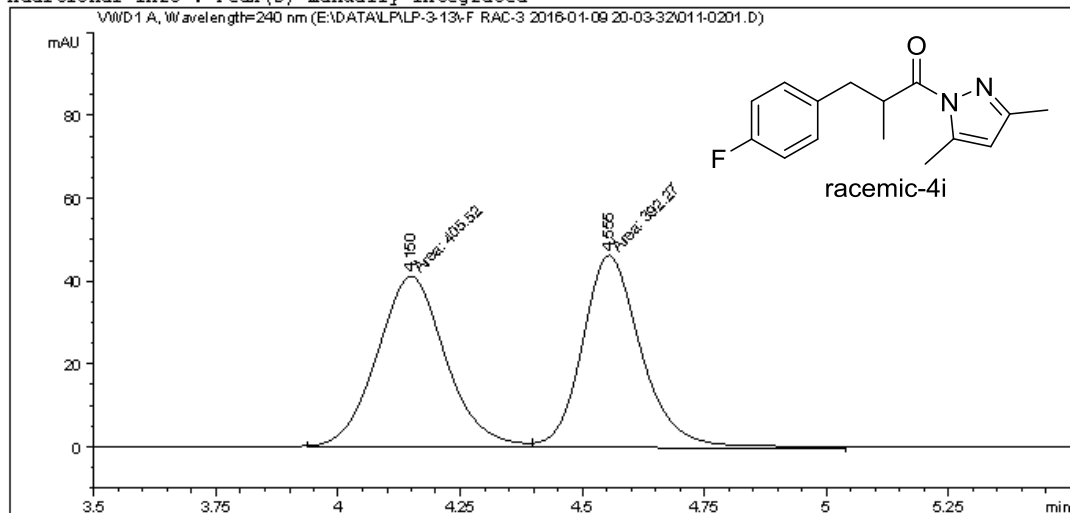

=====  
Area Percent Report  
=====

Sorted By : Signal  
Multiplier : 1.0000  
Dilution : 1.0000  
Do not use Multiplier & Dilution Factor with ISTDs

Signal 1: VWD1 A, Wavelength=240 nm

| Peak # | RetTime [min] | Type | Width [min] | Area [mAU*s] | Height [mAU] | Area %  |
|--------|---------------|------|-------------|--------------|--------------|---------|
| 1      | 4.150         | MF   | 0.1639      | 405.51953    | 41.23326     | 50.8304 |
| 2      | 4.555         | FM   | 0.1407      | 392.27005    | 46.45706     | 49.1696 |

Totals : 797.78958 87.69032

=====  
\*\*\* End of Report \*\*\*



Data File E:\DATA\LP\LP-3-13\F RAC-3 2016-01-09 20-03-32\012-0301.D  
Sample Name: -F

```
=====
Acq. Operator   : SYSTEM                      Seq. Line :    3
Acq. Instrument : 1260HPLC-VWD                Location  : Vial 12
Injection Date  : 1/9/2016 8:28:00 PM          Inj       :    1
                                           Inj Volume: 5.000 µl
Acq. Method     : E:\DATA\LP\LP-3-13\F RAC-3 2016-01-09 20-03-32\VWD-AD(1-2)-99-1-IML-
                  240NM-60MIN.M
Last changed    : 1/9/2016 8:27:16 PM by SYSTEM
Analysis Method : E:\DATA\LP\LP-3-13\F RAC-3 2016-01-09 20-03-32\VWD-AD(1-2)-99-1-IML-
                  240NM-60MIN.M (Sequence Method)
Last changed    : 1/25/2016 8:20:00 PM by SYSTEM
                  (modified after loading)
Additional Info : Peak(s) manually integrated
=====
```

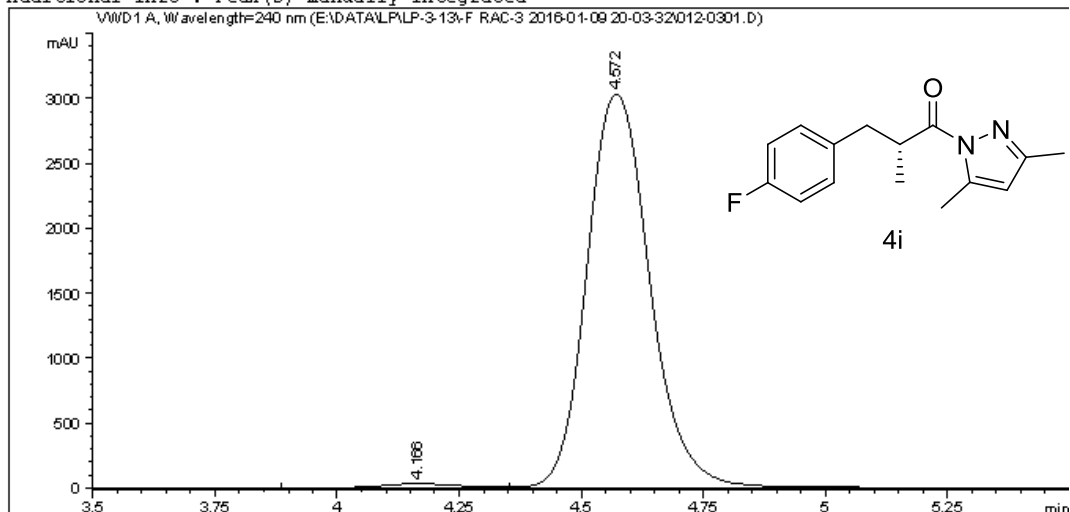

=====  
Area Percent Report  
=====

Sorted By : Signal  
Multiplier : 1.0000  
Dilution : 1.0000  
Do not use Multiplier & Dilution Factor with ISTDs

Signal 1: VWD1 A, Wavelength=240 nm

| Peak # | RetTime [min] | Type | Width [min] | Area [mAU*s] | Height [mAU] | Area %  |
|--------|---------------|------|-------------|--------------|--------------|---------|
| 1      | 4.166         | BV   | 0.1657      | 348.73050    | 31.61261     | 1.2627  |
| 2      | 4.572         | VB   | 0.1389      | 2.72691e4    | 3031.86963   | 98.7373 |

Totals : 2.76178e4 3063.48224

=====  
\*\*\* End of Report \*\*\*

Data File E:\DATA\LP\LP-3-13\LP20160109-1 2016-01-09 14-41-11\001-0601.D  
Sample Name: -Cl 1 RAC

```
=====
Acq. Operator   : SYSTEM                      Seq. Line :    6
Acq. Instrument : 1260HPLC-DAD                Location  : Vial 1
Injection Date  : 1/9/2016 3:50:33 PM          Inj       :    1
                                           Inj Volume: 5.000 µl
Acq. Method     : E:\DATA\LP\LP-3-13\LP20160109-1 2016-01-09 14-41-11\DAD-0J(1-6)-98-2-1.
                                           OML-210-254-30MIN.M
Last changed    : 1/9/2016 3:57:22 PM by SYSTEM
                                           (modified after loading)
Analysis Method : E:\DATA\LP\LP-3-13\LP20160109-1 2016-01-09 14-41-11\DAD-0J(1-6)-98-2-1.
                                           OML-210-254-30MIN.M (Sequence Method)
Last changed    : 1/25/2016 8:06:04 PM by SYSTEM
                                           (modified after loading)
Additional Info : Peak(s) manually integrated
=====
```

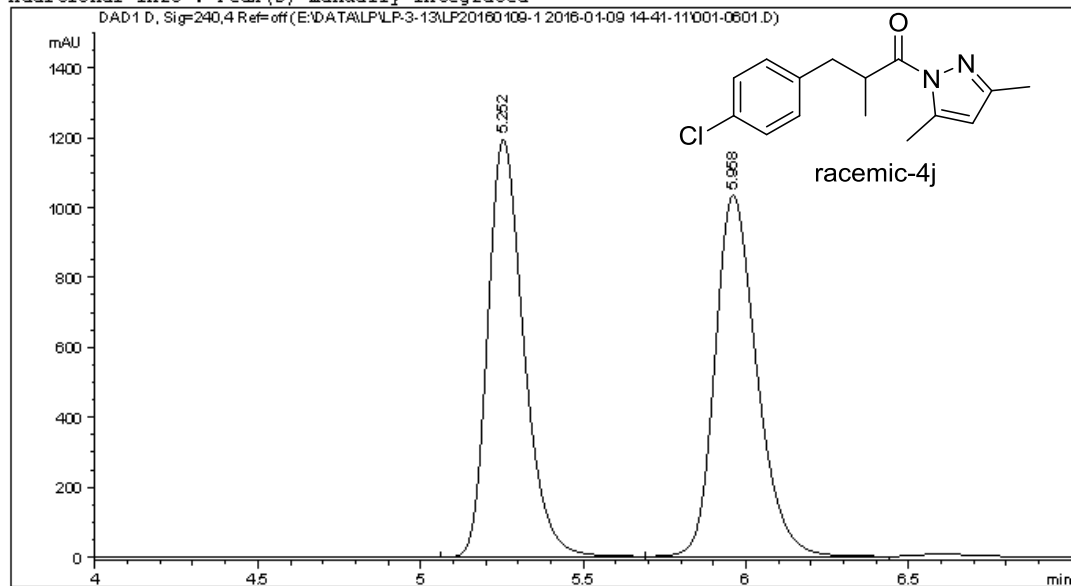

# Area Percent Report

```
Sorted By      :      Signal
Multiplier     :      1.0000
Dilution       :      1.0000
Do not use Multiplier & Dilution Factor with ISTDs
```

Signal 1: DAD1 D, Sig=240,4 Ref=off

| Peak # | RetTime [min] | Type | Width [min] | Area [mAU*s] | Height [mAU] | Area %  |
|--------|---------------|------|-------------|--------------|--------------|---------|
| 1      | 5.252         | BB   | 0.1172      | 9141.96094   | 1196.20447   | 49.7308 |
| 2      | 5.958         | BV   | 0.1362      | 9240.93652   | 1034.62537   | 50.2692 |

Totals : 1.83829e4 2230.82983

Data File E:\DATA\LP\LP-3-15\LP20160118-2 2016-01-18 14-31-28\043-1001.D  
Sample Name: -Cl(2)

=====

|                 |                        |            |            |
|-----------------|------------------------|------------|------------|
| Acq. Operator   | : SYSTEM               | Seq. Line  | : 10       |
| Acq. Instrument | : 1260HPLC-DAD         | Location   | : Vial 43  |
| Injection Date  | : 1/18/2016 5:30:16 PM | Inj        | : 1        |
|                 |                        | Inj Volume | : 5.000 µl |

Acq. Method : E:\DATA\LP\LP-3-15\LP20160118-2 2016-01-18 14-31-28\DAD-0J(1-2)-98-2-1-ALLUM-30MIN.M

Last changed : 1/18/2016 4:09:51 PM by SYSTEM

Analysis Method : E:\DATA\LP\LP-3-15\LP20160118-2 2016-01-18 14-31-28\DAD-0J(1-2)-98-2-1-ALLUM-30MIN.M (Sequence Method)

Last changed : 1/25/2016 8:14:35 PM by SYSTEM  
(modified after loading)

Additional Info : Peak(s) manually integrated

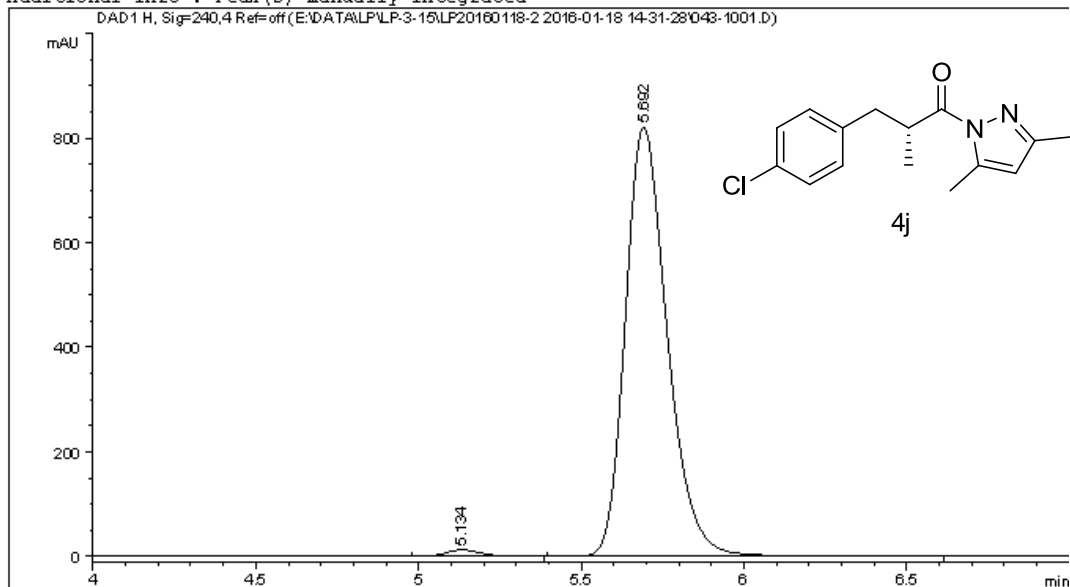

=====  
Area Percent Report  
=====

Sorted By : Signal  
Multiplier : 1.0000  
Dilution : 1.0000  
Do not use Multiplier & Dilution Factor with ISTDs

Signal 1: DAD1 H, Sig=240,4 Ref=off

| Peak # | RetTime [min] | Type | Width [min] | Area [mAU*s] | Height [mAU] | Area %  |
|--------|---------------|------|-------------|--------------|--------------|---------|
| 1      | 5.134         | BB   | 0.1191      | 95.60490     | 12.51784     | 1.2826  |
| 2      | 5.692         | BB   | 0.1364      | 7358.16504   | 821.98718    | 98.7174 |

Totals : 7453.76994 834.50502

=====  
\*\*\* End of Report \*\*\*

Data File E:\DATA\LP\LP-3-15\LP20160118-2 2016-01-18 14-31-28\023-0401.D  
Sample Name: Fruyl

```
=====
Acq. Operator   : SYSTEM                      Seq. Line :    4
Acq. Instrument : 1260HPLC-DAD                Location  : Vial 23
Injection Date  : 1/18/2016 3:45:49 PM        Inj       :    1
                                           Inj Volume: 5.000 µl

Acq. Method     : E:\DATA\LP\LP-3-15\LP20160118-2 2016-01-18 14-31-28\
ALLUM-30MIN.M
Last changed    : 1/18/2016 4:09:51 PM by SYSTEM
                  (modified after loading)
Analysis Method : E:\DATA\LP\LP-3-15\LP20160118-2 2016-01-18 14-31-28\
ALLUM-30MIN.M (Sequence Method)
Last changed    : 1/25/2016 7:50:39 PM by SYSTEM
                  (modified after loading)
Additional Info : Peak(s) manually integrated
=====
```

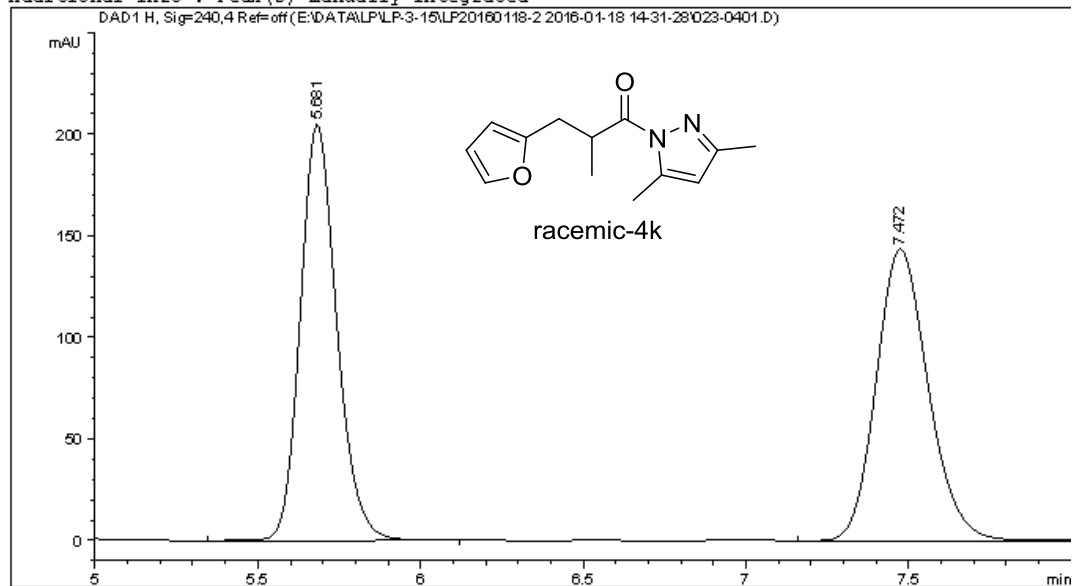

Area Percent Report

```
Sorted By      : Signal
Multiplier     : 1.0000
Dilution       : 1.0000
Do not use Multiplier & Dilution Factor with ISTDs
```

Signal 1: DAD1 H, Sig=240,4 Ref=off

| Peak # | RetTime [min] | Type | Width [min] | Area [mAU*s] | Height [mAU] | Area %  |
|--------|---------------|------|-------------|--------------|--------------|---------|
| 1      | 5.681         | BB   | 0.1187      | 1594.19800   | 204.98987    | 50.0613 |
| 2      | 7.472         | BB   | 0.1711      | 1590.29651   | 143.67979    | 49.9387 |

Totals : 3184.49451 348.66966

Data File E:\DATA\LP\LP-3-15\LP20160118-2 2016-01-18 14-31-28\033-0701.D  
Sample Name: fruy1

```
=====
Acq. Operator   : SYSTEM                      Seq. Line :    7
Acq. Instrument : 1260HPLC-DAD                Location  : Vial 33
Injection Date  : 1/18/2016 4:42:34 PM        Inj       :    1
                                           Inj Volume: 5.000 µl
Acq. Method     : E:\DATA\LP\LP-3-15\LP20160118-2 2016-01-18 14-31-28\DAD-0J(1-2)-98-2-1-
                  ALLUM-30MIN.M
Last changed    : 1/18/2016 4:09:51 PM by SYSTEM
Analysis Method : E:\DATA\LP\LP-3-15\LP20160118-2 2016-01-18 14-31-28\DAD-0J(1-2)-98-2-1-
                  ALLUM-30MIN.M (Sequence Method)
Last changed    : 1/25/2016 7:57:37 PM by SYSTEM
                  (modified after loading)
Additional Info : Peak(s) manually integrated
=====
```

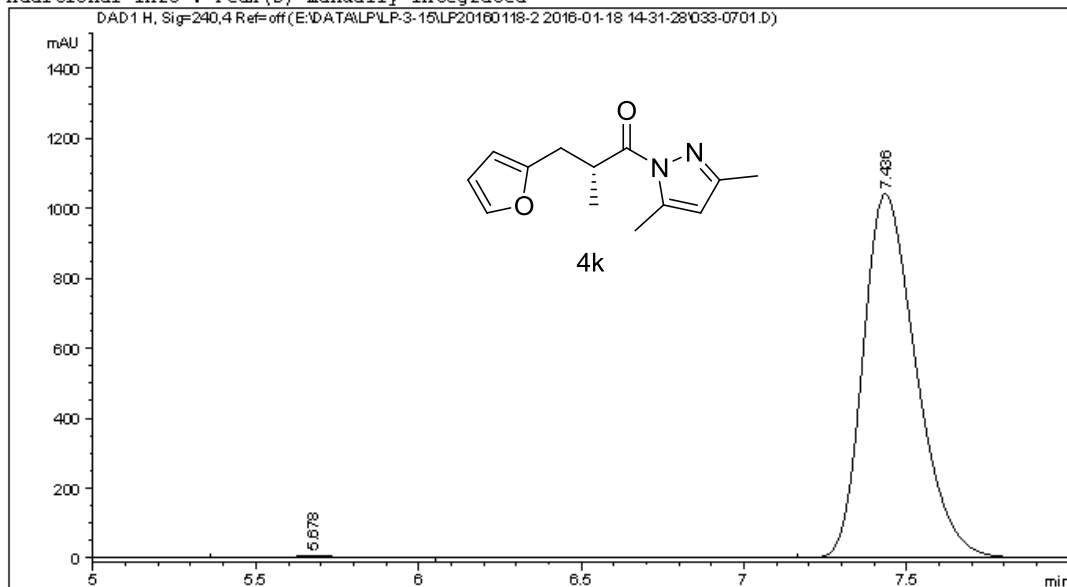

=====  
Area Percent Report  
=====

Sorted By : Signal  
Multiplier : 1.0000  
Dilution : 1.0000  
Do not use Multiplier & Dilution Factor with ISTDs

Signal 1: DAD1 H, Sig=240,4 Ref=off

| Peak # | RetTime [min] | Type | Width [min] | Area [mAU*s] | Height [mAU] | Area %  |
|--------|---------------|------|-------------|--------------|--------------|---------|
| 1      | 5.678         | BB   | 0.1286      | 73.65875     | 8.53807      | 0.6214  |
| 2      | 7.436         | BB   | 0.1758      | 1.17796e4    | 1042.33997   | 99.3786 |

Totals : 1.18532e4 1050.87804

=====  
\*\*\* End of Report \*\*\*

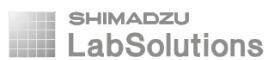

# Analysis Report

## <Sample Information>

Sample Name : LP-C-hex rac  
 Sample ID :  
 Data Filename : lp-c-hex rac.gcd  
 Method Filename : bdex120-250-80~150-260-150min.gcm  
 Batch Filename : zrt-7-8-1.gcb  
 Vial # : 21  
 Injection Volume : 1 uL  
 Date Acquired : 2016-7-28 10:29:47  
 Date Processed : 2016-8-23 17:09:56

Sample Type : Unknown  
 Acquired by : System Administrator  
 Processed by : System Administrator

## <Chromatogram>

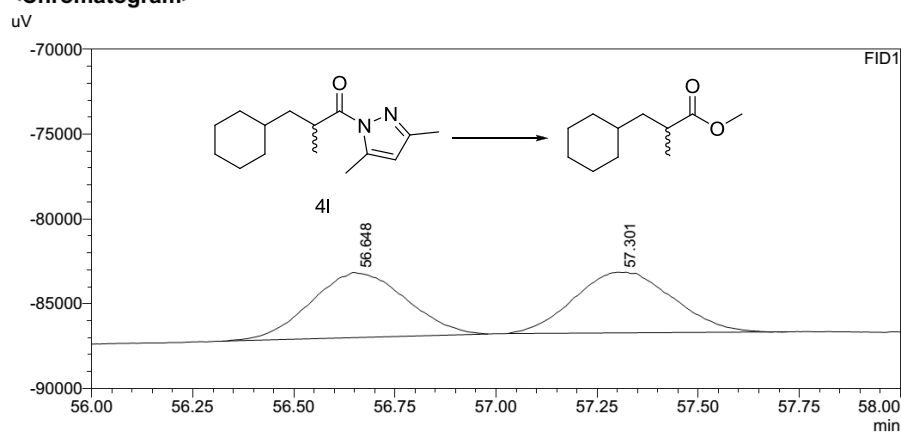

## <Peak Table>

| Peak# | Ret. Time | Area   | Height | Conc.  | Unit | Mark | Name |
|-------|-----------|--------|--------|--------|------|------|------|
| 1     | 56.648    | 62679  | 3835   | 50.814 |      | M    |      |
| 2     | 57.301    | 60671  | 3573   | 49.186 |      | M    |      |
| Total |           | 123350 | 7408   |        |      |      |      |

D:\DATA FILE\LP\data\lp-c-hex rac.gcd

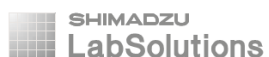

# Analysis Report

## <Sample Information>

Sample Name : lp20160730-guanghuo  
 Sample ID :  
 Data Filename : lp-c-hex guanghuo.gcd  
 Method Filename : bdex120-250-80~150-260-150min.gcm  
 Batch Filename : zrt-7-8-1.gcb  
 Vial # : 21  
 Injection Volume : 1 uL  
 Date Acquired : 2016-7-30 21:01:31  
 Date Processed : 2016-7-30 22:02:59

Sample Type : Unknown  
 Acquired by : System Administrator  
 Processed by : System Administrator

## <Chromatogram>

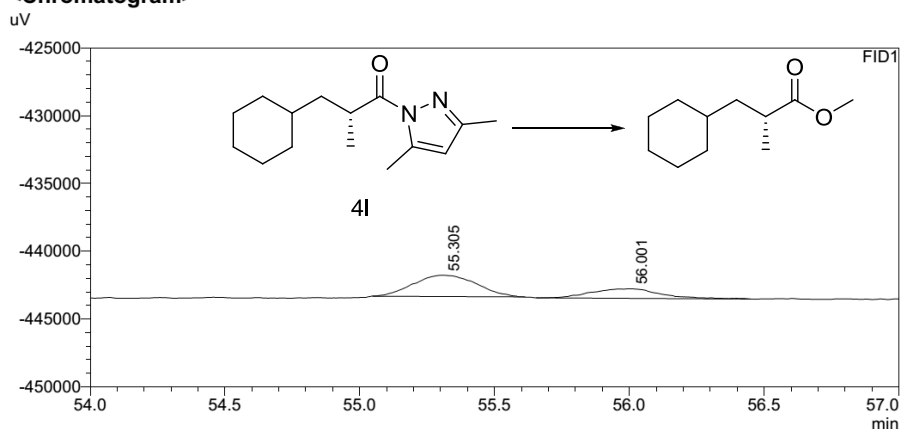

## <Peak Table>

FID1

| Peak# | Ret. Time | Area  | Height | Conc.  | Unit | Mark | Name |
|-------|-----------|-------|--------|--------|------|------|------|
| 1     | 55.305    | 25528 | 1571   | 66.890 |      | M    |      |
| 2     | 56.001    | 12636 | 705    | 33.110 |      | M    |      |
| Total |           | 38164 | 2276   |        |      |      |      |

D:\DATA FILE\LP\data\lp-c-hex guanghuo.gcd

Data File E:\DATA\GYQ\GYQ-GM\GYQ-20160730-RAC 2016-07-30 14:47-24\031-0701.D  
Sample Name: rac

=====

|                 |                        |            |            |
|-----------------|------------------------|------------|------------|
| Acq. Operator   | : SYSTEM               | Seq. Line  | : 7        |
| Acq. Instrument | : 1260HPLC-DAD         | Location   | : Vial 31  |
| Injection Date  | : 7/30/2016 6:39:22 PM | Inj        | : 1        |
|                 |                        | Inj Volume | : 5.000 µl |

Acq. Method : E:\DATA\GYQ\GYQ-GM\GYQ-20160730-RAC 2016-07-30 14:47-24\DAD-0J(1-6)-95-0  
.6ML-ALLNM-60MIN2015-3.M

Last changed : 7/30/2016 7:04:26 PM by SYSTEM  
(modified after loading)

Analysis Method : E:\DATA\GYQ\GYQ-GM\GYQ-20160730-RAC 2016-07-30 14:47-24\DAD-0J(1-6)-95-0  
.6ML-ALLNM-60MIN2015-3.M (Sequence Method)

Last changed : 7/31/2016 9:45:53 PM by SYSTEM  
(modified after loading)

Additional Info : Peak(s) manually integrated

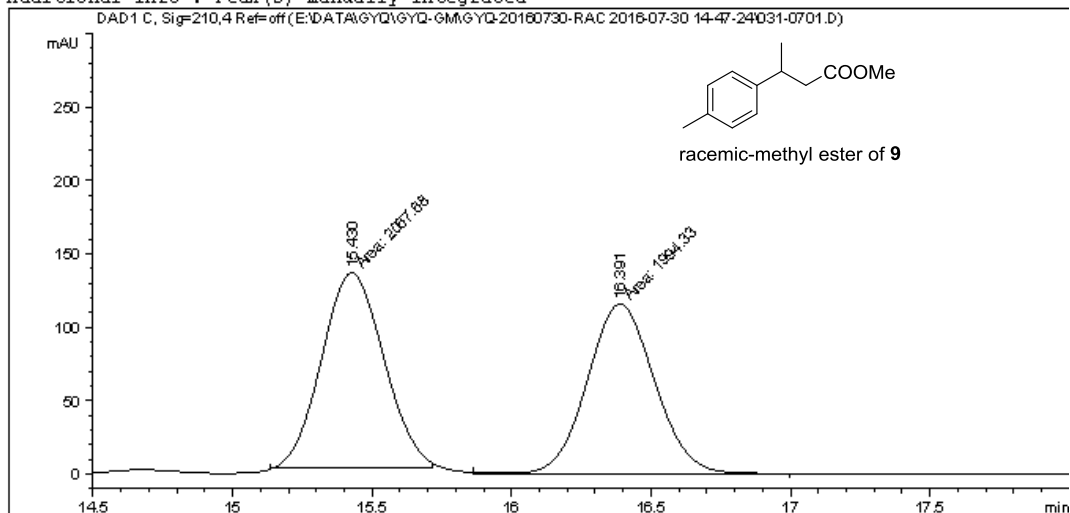

=====  
Area Percent Report  
=====

Sorted By : Signal  
Multiplier : 1.0000  
Dilution : 1.0000  
Do not use Multiplier & Dilution Factor with ISTDs

Signal 1: DAD1 C, Sig=210,4 Ref=off

| Peak # | RetTime [min] | Type | Width [min] | Area [mAU*s] | Height [mAU] | Area %  |
|--------|---------------|------|-------------|--------------|--------------|---------|
| 1      | 15.430        | MM   | 0.2585      | 2067.68335   | 133.32091    | 50.9029 |
| 2      | 16.391        | MM   | 0.2857      | 1994.32837   | 116.35642    | 49.0971 |

Totals : 4062.01172 249.67733

=====  
\*\*\* End of Report \*\*\*



Data File E:\DATA\LP\LP20160731\LP20160731 2016-07-31 17-30-12\081-0201.D  
Sample Name: LP

```
=====
Acq. Operator   : SYSTEM                      Seq. Line :    2
Acq. Instrument : 1260HPLC-VWD                Location  : Vial 81
Injection Date  : 7/31/2016 5:34:43 PM        Inj       :    1
                                           Inj Volume: 5.000 µl
Acq. Method     : E:\DATA\LP\LP20160731\LP20160731 2016-07-31 17-30-12\VWD-0J(1-6)-95-5-0.
                                           6ML-5UL-210-60MIN.M
Last changed    : 7/31/2016 5:30:12 PM by SYSTEM
Analysis Method : E:\DATA\LP\LP20160731\LP20160731 2016-07-31 17-30-12\VWD-0J(1-6)-95-5-0.
                                           6ML-5UL-210-60MIN.M (Sequence Method)
Last changed    : 7/31/2016 9:48:57 PM by SYSTEM
                                           (modified after loading)
Additional Info : Peak(s) manually integrated
=====
```

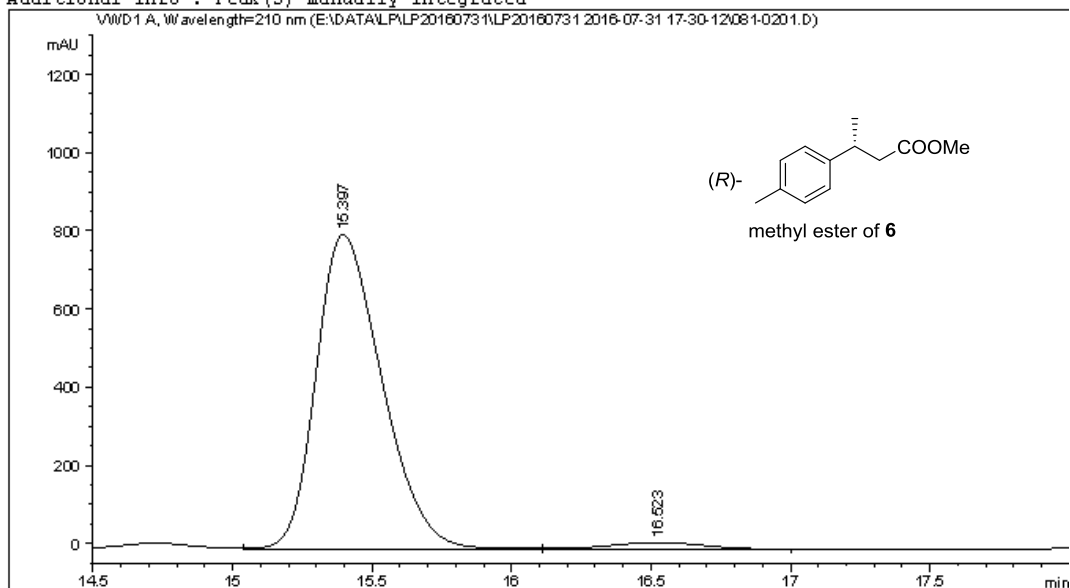

=====  
Area Percent Report  
=====

Sorted By : Signal  
Multiplier : 1.0000  
Dilution : 1.0000  
Do not use Multiplier & Dilution Factor with ISTDs

Signal 1: VWD1 A, Wavelength=210 nm

| Peak # | RetTime [min] | Type | Width [min] | Area [mAU*s] | Height [mAU] | Area %  |
|--------|---------------|------|-------------|--------------|--------------|---------|
| 1      | 15.397        | VV   | 0.2527      | 1.31294e4    | 803.13306    | 97.3857 |
| 2      | 16.523        | VB   | 0.3359      | 352.45477    | 16.45183     | 2.6143  |

Totals : 1.34819e4 819.58489

=====  
\*\*\* End of Report \*\*\*

## VII. Reference

1. Q. Yan, D. Kong, W. Zhao, G. Zi, G. Hou, *J. Org. Chem.*, 2016, **81**, 2070–2077.
2. M. Abe, K. Nishikawa, H. Fukuda, K. Nakanishi, Y. Tazawa, T. Taniguchi, S.-Y. Park, S. Hiradate, Y. Fujii, K. Okuda, M. Shindo, *Phytochemistry*, 2012, **84**, 56-67.
3. K. Dong, Y. Li, Z. Wang, K. Ding, *Org. Chem. Front*, 2014, **1**, 155-160.
4. S. Li, S.-F. Zhu, C.-M. Zhang, S. Song, Q.-L. Zhou, *J. Am. Chem. Soc*, 2008, **130**, 8584-8585.
5. X.-Q. Dong, X. Fang, H.-Y. Tao, X. Zhou, C.-J. Wang, *Chem. Commun.* 2012, **48** (58), 7238-7240.
